# Supplementary material for: Rational design of photo-cleavable alkoxyamines for polymerization and synthesis
Source: Royal Society of Chemistry journal article supplement (doi:10.1039/d0cp02924f), 2020-01-01
Supplement: d0cp02924f1.pdf [file d0cp02924f1.pdf]

## Supporting Information:

# Rational Design of Photo-cleavable Alkoxyamines for Polymerization and Synthesis

Nicholas S. Hill, Michelle L. Coote

ARC Centre of Excellence for Electromaterials Science, Research School of Chemistry, Australian National University, Canberra, Australian Capital Territory, 2601, Australia

## Supplementary Information

### Table of Contents

|                                                                         |    |
|-------------------------------------------------------------------------|----|
| Supplementary Figures .....                                             | 2  |
| Raw Energies .....                                                      | 3  |
| Raw Vertical Excitation Energies and Oscillator Intensities .....       | 4  |
| Open shell singlet vs triplet Mulliken Charges and Spin Densities ..... | 5  |
| Gas Phase Structure Cartesian Coordinates .....                         | 7  |
| Solvent Phase Structure Cartesian Coordinates and Free Energies.....    | 62 |

## Supplementary Figures

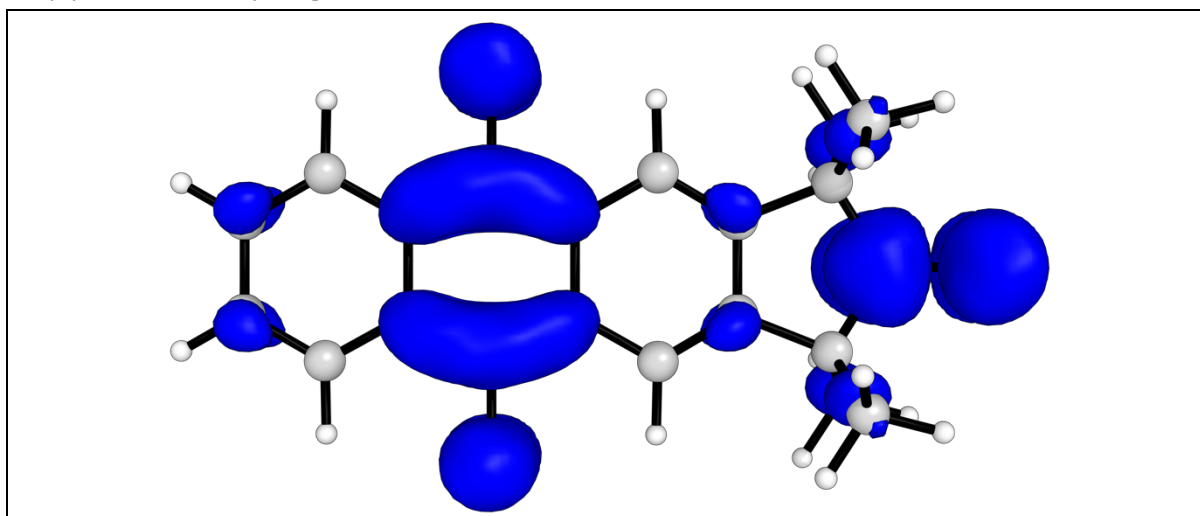

**Figure S1.** Spin density of anthraquinone-alkoxyamine triplet anion

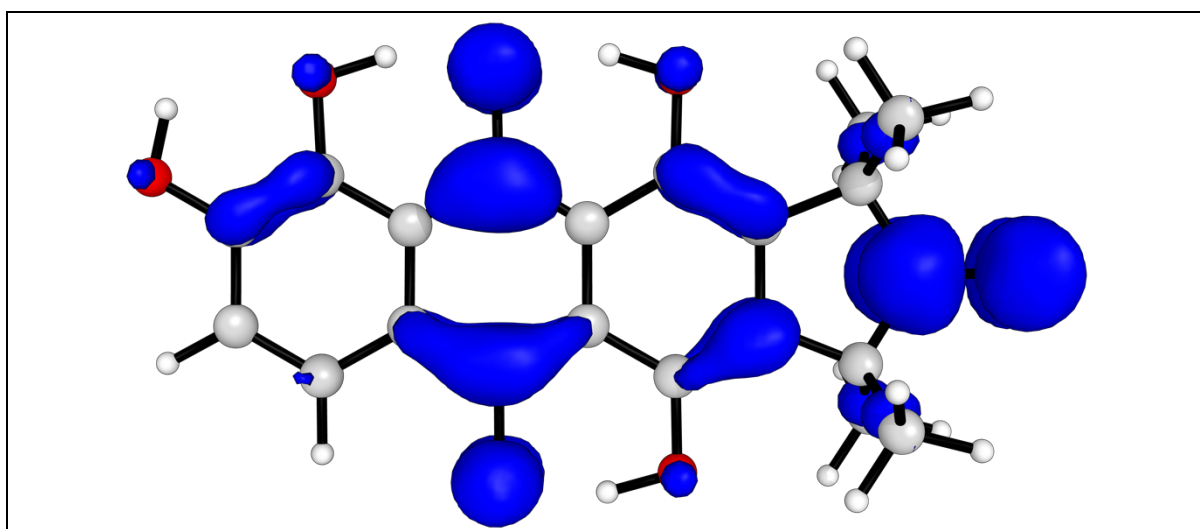

**Figure S2.** Spin density of 1,2,5,8-THAQ triplet anion

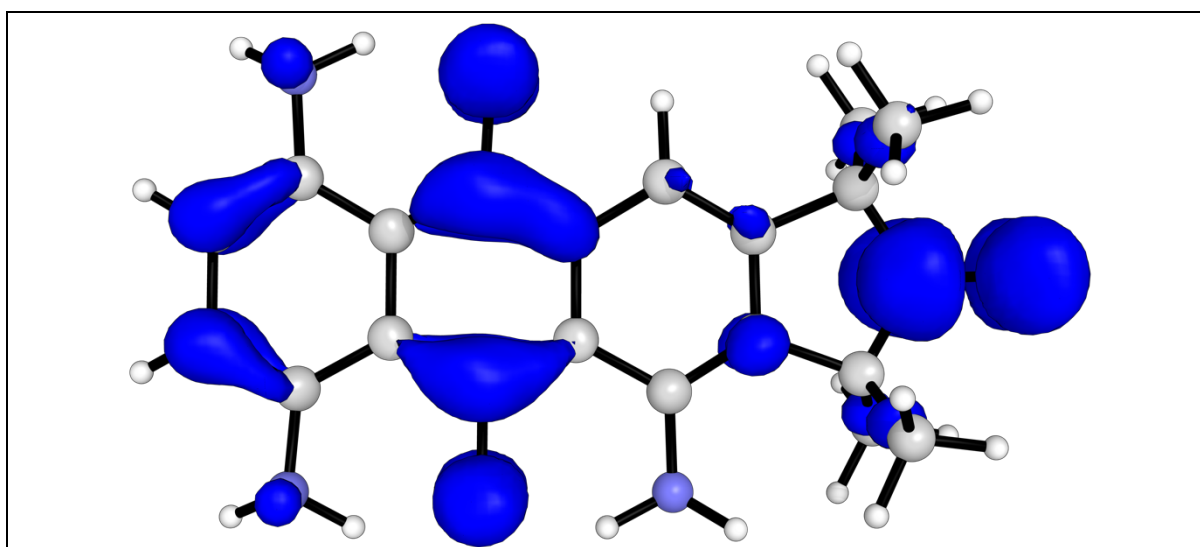

**Figure S3.** Spin density of 1,4,5-TAAQ triplet anion

## Raw Energies

**Table S1.** Free energy components of all reported species

| Structure             | Gas                                                   |                       |                       | Solvent Electronic Energy (H) |
|-----------------------|-------------------------------------------------------|-----------------------|-----------------------|-------------------------------|
|                       | Zero-point Vibrational Energy (kJ mol <sup>-1</sup> ) | Gibbs Free Energy (H) | Electronic Energy (H) |                               |
| Aq-STY                | 1284.7707                                             | -1362.714547          | -1363.147108          | -1363.176845                  |
| Aq-STY radical cation | 1283.1448                                             | -1362.44675           | -1362.877206          | -1362.96369                   |
| Aq-EIB                | 1331.5978                                             | -1438.130226          | -1438.576377          | -1438.605936                  |
| Aq-EIB radical cation | 1330.2664                                             | -1437.858393          | -1438.30392           | -1438.389465                  |
| Aq-EP                 | 1256.9638                                             | -1398.861173          | -1399.278837          | -1399.308678                  |
| Aq-EP radical cation  | 1256.9586                                             | -1398.585688          | -1399.003086          | -1399.09057                   |
| Aq-Me                 | 993.2202                                              | -1092.551213          | -1092.879409          | -1092.902015                  |
| Aq-Me radical cation  | 994.2860                                              | -1092.278009          | -1092.605827          | -1092.6926                    |
| 1,2-DHAQ Aq-STY       | 1308.7470                                             | -1513.126329          | -1513.565931          | -1513.596034                  |
| 1,2-DHAQ Aq-EIB       | 1355.2516                                             | -1588.542485          | -1588.995826          | -1589.026144                  |
| 1,2-DHAQ Aq-EP        | 1281.1956                                             | -1549.271507          | -1549.697381          | -1549.728315                  |
| 1,2-DHAQ Aq-Me        | 1017.2067                                             | -1242.962938          | -1243.298124          | -1243.321234                  |
| 1,2,4-THAQ Aq-STY     | 1321.0531                                             | -1588.334607          | -1588.778172          | -1588.808301                  |
| 1,2,4-THAQ Aq-EIB     | 1367.3783                                             | -1663.7508            | -1664.208035          | -1664.238335                  |
| 1,2,4-THAQ Aq-EP      | 1293.3047                                             | -1624.479857          | -1624.909579          | -1624.940506                  |
| 1,2,4-THAQ Aq-Me      | 1029.2861                                             | -1318.171263          | -1318.51032           | -1318.533403                  |
| 1,2,5-THAQ Aq-STY     | 1322.1555                                             | -1588.335024          | -1588.779229          | -1588.807749                  |
| 1,2,5-THAQ Aq-EIB     | 1367.3144                                             | -1663.75249           | -1664.2089            | -1664.237625                  |
| 1,2,5-THAQ Aq-EP      | 1294.4951                                             | -1624.480247          | -1624.910728          | -1624.940242                  |
| 1,2,5-THAQ Aq-Me      | 1030.5087                                             | -1318.171696          | -1318.511383          | -1318.533137                  |
| 1,2,5,8-THAQ Aq-STY   | 1334.7939                                             | -1663.540073          | -1663.988305          | -1664.015939                  |
| 1,2,5,8-THAQ Aq-EIB   | 1382.1761                                             | -1738.955443          | -1739.418822          | -1739.446483                  |
| 1,2,5,8-THAQ Aq-EP    | 1309.6530                                             | -1699.679723          | -1700.116553          | -1700.144401                  |
| 1,2,5,8-THAQ Aq-Me    | 1043.1987                                             | -1393.3772            | -1393.720968          | -1393.741813                  |
| 1,5-DAAQ Aq-STY       | 1373.3381                                             | -1473.376057          | -1473.839381          | -1473.8713                    |
| 1,5-DAAQ Aq-EIB       | 1420.0344                                             | -1548.792278          | -1549.269672          | -1549.301551                  |
| 1,5-DAAQ Aq-EP        | 1347.1325                                             | -1509.516822          | -1509.967483          | -1509.999591                  |
| 1,5-DAAQ Aq-Me        | 1081.3977                                             | -1203.214213          | -1203.572913          | -1203.597966                  |
| 1,4-DAAQ Aq-STY       | 1370.1582                                             | -1473.37495           | -1473.838512          | -1473.871804                  |
| 1,4-DAAQ Aq-EIB       | 1418.1396                                             | -1548.792402          | -1549.268696          | -1549.302015                  |
| 1,4-DAAQ Aq-EP        | 1345.6826                                             | -1509.516401          | -1509.966516          | -1510.000035                  |
| 1,4-DAAQ Aq-Me        | 1078.2551                                             | -1203.212036          | -1203.570975          | -1203.597153                  |
| 1,4,5-TAAQ Aq-STY     | 1416.7762                                             | -1528.70211           | -1529.180522          | -1529.214581                  |
| 1,4,5-TAAQ Aq-EIB     | 1463.0219                                             | -1604.117969          | -1604.611276          | -1604.64391                   |
| 1,4,5-TAAQ Aq-EP      | 1390.9345                                             | -1564.847844          | -1565.314161          | -1565.347666                  |
| 1,4,5-TAAQ Aq-Me      | 1124.5789                                             | -1258.54067           | -1258.914224          | -1258.941346                  |
| 1,4,5,8-TAAQ Aq-STY   | 1462.0248                                             | -1584.020974          | -1584.51564           | -1584.55009                   |

|                                              |           |              |              |              |
|----------------------------------------------|-----------|--------------|--------------|--------------|
| 1,4,5,8-TAAQ Aq-EIB                          | 1510.4923 | -1659.437017 | -1659.947741 | -1659.981403 |
| 1,4,5,8-TAAQ Aq-EP                           | 1437.4259 | -1620.161661 | -1620.645389 | -1620.67928  |
| 1,4,5,8-TAAQ Aq-Me                           | 1170.3883 | -1313.860758 | -1314.250538 | -1314.278712 |
| AQ-NO radical                                | 886.6340  | -1052.69662  | -1052.984009 | -1053.00927  |
| AQ-NO cation                                 | 889.4054  | -1052.428996 | -1052.719091 | -1052.806342 |
| AQ-NO anion                                  | 877.8209  | -1052.723509 | -1053.009311 | -1053.087975 |
| Pyridine                                     | 235.2370  | -248.123997  | -248.1861964 | -248.1957941 |
| Methyl-pyridine cation                       | 332.9927  | -287.746132  | -287.8470342 | -287.9292132 |
| Methyl-pyridine cation                       | 344.7885  | -287.93308   | -288.0288912 | -288.039927  |
| AQ-Me-Pyridine TS (ground state)             | 1225.5824 | -1340.38196  | -1340.789026 | -1340.874367 |
| AQ-Me-Pyridine TS (radical cation)           | 1230.2303 | -1340.577063 | -1340.982771 | -1340.982784 |
| AQ-BF <sub>3</sub> -Me radical               | 1067.4275 | -1455.652501 | -1455.997519 | -1456.020173 |
| AQ-BF <sub>3</sub> -Me-Pyridine TS (radical) | 1309.5435 | -1703.692401 | -1704.123802 | -1704.198845 |
| AQ-BF <sub>3</sub> -NO radical               | 964.8818  | -1415.931595 | -1416.242903 | -1416.323595 |
| AQ-BF <sub>3</sub> -NO cation                | 968.6831  | -1415.763854 | -1416.07797  | -1416.137472 |

## Raw Vertical Excitation Energies and Oscillator Intensities

**Table S2.** Singlet vertical excitation energies and oscillator intensities for all reported functionalized species

| Species |           | $n_N\pi^*$  |                      | $\pi\pi^*$  |                      |
|---------|-----------|-------------|----------------------|-------------|----------------------|
|         |           | Energy (eV) | Oscillator Intensity | Energy (eV) | Oscillator Intensity |
| AQ-STY  | 14-DAAQ   | 4.1777      | 0.0042               | 2.6689      | 0.3589               |
|         | 15-DAAQ   | 4.0611      | 0.0156               | 3.118       | 0.4818               |
|         | 145-TAAQ  | 4.6377      | 0.0196               | 2.6317      | 0.4618               |
|         | 1458-TAAQ | 4.2553      | 0.0133               | 2.4451      | 0.5935               |
|         | 12-DHAQ   | 3.5078      | 0.1929               | 3.808       | 0.0683               |
|         | 125-THAQ  | 3.6511      | 0.0613               | 3.3336      | 0.4020               |
|         | 124-THAQ  | 3.7212      | 0.0231               | 3.1384      | 0.3050               |
|         | 1258-THAQ | 3.6288      | 0.0633               | 2.9949      | 0.5039               |
| AQ-EIB  | 14-DAAQ   | 4.1907      | 0.0048               | 2.6585      | 0.3597               |
|         | 15-DAAQ   | 4.0847      | 0.0137               | 3.1157      | 0.4825               |
|         | 145-TAAQ  | 4.7111      | 0.0217               | 2.627       | 0.4593               |
|         | 1458-TAAQ | 4.2867      | 0.0097               | 2.4416      | 0.5992               |
|         | 12-DHAQ   | 3.8223      | 0.0762               | 3.5042      | 0.1957               |
|         | 125-THAQ  | 3.7318      | 0.0211               | 3.3321      | 0.4018               |
|         | 124-THAQ  | 3.7369      | 0.0240               | 3.1354      | 0.3048               |
|         | 1258-THAQ | 3.6729      | 0.0628               | 3.003       | 0.5054               |
| AQ-EP   | 14-DAAQ   | 4.1947      | 0.0049               | 2.6585      | 0.3574               |
|         | 15-DAAQ   | 4.0899      | 0.0135               | 3.118       | 0.4757               |
|         | 145-TAAQ  | 4.6461      | 0.0199               | 2.6256      | 0.4587               |
|         | 1458-TAAQ | 4.2911      | 0.0095               | 2.4442      | 0.5937               |
|         | 12-DHAQ   | 3.8272      | 0.0749               | 3.4988      | 0.1950               |

|       |           |        |        |        |        |
|-------|-----------|--------|--------|--------|--------|
|       | 125-THAQ  | 3.6693 | 0.0616 | 3.3322 | 0.3980 |
|       | 124-THAQ  | 3.7425 | 0.0230 | 3.1306 | 0.3021 |
|       | 1258-THAQ | 3.4881 | 0.0143 | 3.0031 | 0.5010 |
| AQ-ME | 14-DAAQ   | 4.189  | 0.0049 | 2.6502 | 0.3509 |
|       | 15-DAAQ   | 4.0801 | 0.0145 | 3.1034 | 0.4725 |
|       | 145-TAAQ  | 4.6082 | 0.0160 | 2.6183 | 0.4501 |
|       | 1458-TAAQ | 4.2798 | 0.0097 | 2.4549 | 0.5745 |
|       | 12-DHAQ   | 3.8161 | 0.0719 | 3.5001 | 0.1904 |
|       | 125-THAQ  | 3.7316 | 0.0217 | 3.3344 | 0.3880 |
|       | 124-THAQ  | 3.7316 | 0.0223 | 3.1307 | 0.2956 |
|       | 1258-THAQ | 3.6389 | 0.0591 | 3.0008 | 0.4846 |

**Table S3.** Vertical excitation energies of unfunctionalized species

| Species | $n_N\pi^*$ | $\pi\pi^*$ | $n_O\pi^*$ |
|---------|------------|------------|------------|
| AQ      | N/A        | 4.3443     | 3.226      |
| AQ-STY  | 3.963      | 4.3512     | 3.2686     |
| AQ-EIB  | 3.9837     | 4.3585     | 3.2678     |
| AQ-EP   | 3.9923     | 4.3654     | 3.264      |
| AQ-ME   | 3.978      | 4.3661     | 3.2622     |

## Open shell singlet vs triplet Mulliken Charges and Spin Densities

**Table S4.** Mulliken charge and spin densities of unfunctionalized anthraquinone-alkoxyamine

| Atom | Open shell singlet biradical |              | Triplet biradical |              |
|------|------------------------------|--------------|-------------------|--------------|
|      | Charge                       | Spin density | Charge            | Spin density |
| C    | -0.10846                     | -0.031765    | -0.108436         | 0.031738     |
| C    | -0.10846                     | -0.031765    | -0.108436         | 0.031738     |
| C    | 0.112076                     | -0.005695    | 0.112151          | 0.00574      |
| C    | 0.120078                     | -0.039274    | 0.120094          | 0.039206     |
| C    | 0.120078                     | -0.039274    | 0.120094          | 0.039206     |
| C    | 0.112076                     | -0.005695    | 0.112151          | 0.00574      |
| C    | -0.19528                     | -0.109268    | -0.195363         | 0.111049     |
| C    | 0.128339                     | -0.041434    | 0.12829           | 0.042139     |
| C    | 0.128337                     | -0.041434    | 0.128288          | 0.042139     |
| C    | -0.19528                     | -0.109268    | -0.195363         | 0.111049     |
| C    | 0.164102                     | -0.005781    | 0.164232          | 0.006026     |
| C    | -0.714141                    | -0.05293     | -0.714051         | 0.009406     |
| C    | -0.71413                     | -0.05293     | -0.714049         | 0.009406     |
| C    | 0.164102                     | -0.005781    | 0.164232          | 0.006026     |
| O    | -0.640164                    | -0.224921    | -0.640125         | 0.224845     |
| O    | -0.640165                    | -0.224921    | -0.640125         | 0.224845     |
| C    | 0.401988                     | -0.002567    | 0.40223           | 0.04158      |
| N    | -0.41681                     | 0.500614     | -0.417318         | 0.493929     |
| C    | 0.401987                     | -0.002568    | 0.402229          | 0.04158      |
| O    | 0.0613                       | 0.47028      | 0.061469          | 0.47018      |
| C    | 0.2046                       | 0.014093     | 0.204442          | 0.003107     |
| C    | 0.204618                     | 0.014096     | 0.20446           | 0.003111     |
| C    | 0.204599                     | 0.014092     | 0.204442          | 0.003107     |
| C    | 0.204619                     | 0.014096     | 0.204461          | 0.00311      |

**Table S5.** Mulliken charge and spin densities of 1,2,5,8-THAQ

| Atom | Open shell singlet biradical |              | Triplet biradical |              |
|------|------------------------------|--------------|-------------------|--------------|
|      | Charge                       | Spin density | Charge            | Spin density |
| C    | -0.175843                    | -0.071941    | -0.176068         | 0.021774     |
| C    | -0.312048                    | -0.122344    | -0.311778         | 0.070176     |
| C    | -0.042553                    | -0.017077    | -0.042552         | 0.025053     |
| C    | -0.225538                    | -0.003295    | -0.225717         | 0.012635     |
| C    | -0.311924                    | 0.050501     | -0.311813         | -0.043246    |
| C    | -0.141847                    | -0.059469    | -0.14175          | 0.065041     |
| C    | 0.598017                     | -0.203833    | 0.598045          | 0.205617     |
| C    | 0.367266                     | 0.035231     | 0.367386          | -0.035187    |
| C    | -0.206979                    | -0.021696    | -0.206978         | 0.021625     |
| C    | 0.139214                     | -0.114884    | 0.139191          | 0.116965     |
| C    | -0.348862                    | -0.050467    | -0.348857         | 0.050311     |
| C    | 0.195531                     | -0.044854    | 0.195505          | 0.04481      |
| C    | 0.208096                     | -0.017196    | 0.20814           | 0.017041     |
| C    | -0.089107                    | -0.02531     | -0.089052         | 0.025315     |
| O    | -0.793857                    | -0.156254    | -0.793845         | 0.156139     |
| O    | -0.653962                    | -0.158507    | -0.653987         | 0.158495     |
| C    | 0.249899                     | 0.004971     | 0.250301          | 0.025933     |
| C    | 0.312623                     | 0.001919     | 0.312927          | 0.033723     |
| O    | -0.128055                    | -0.006786    | -0.128036         | 0.007028     |
| O    | -0.094833                    | -0.011844    | -0.094728         | 0.011974     |
| O    | -0.166806                    | -0.007497    | -0.166785         | 0.00749      |
| O    | -0.157636                    | -0.006407    | -0.157619         | 0.006405     |
| N    | -0.393451                    | 0.499972     | -0.394056         | 0.492257     |
| O    | 0.084843                     | 0.471493     | 0.084978          | 0.470661     |
| C    | 0.273622                     | 0.008378     | 0.273385          | 0.008222     |
| C    | 0.273602                     | 0.008376     | 0.273366          | 0.008216     |
| C    | 0.270263                     | 0.009407     | 0.270167          | 0.007766     |
| C    | 0.270327                     | 0.009416     | 0.270231          | 0.00776      |

**Table S6.** Mulliken charge and spin densities of 1,4,5-TAAQ

| Atom | Open shell singlet biradical |              | Triplet biradical |              |
|------|------------------------------|--------------|-------------------|--------------|
|      | Charge                       | Spin density | Charge            | Spin density |
| C    | -0.779981                    | -0.037047    | -0.780185         | -0.008391    |
| C    | -0.432664                    | -0.07917     | -0.432413         | 0.025587     |
| C    | 0.49416                      | 0.005561     | 0.4942            | -0.009174    |
| C    | -0.353045                    | -0.005702    | -0.353309         | 0.002228     |
| C    | -0.120744                    | -0.069384    | -0.120495         | 0.071977     |
| C    | 0.10312                      | -0.032459    | 0.103398          | 0.035732     |
| C    | -0.150756                    | -0.124366    | -0.150857         | 0.12737      |
| C    | 0.278006                     | 0.022269     | 0.278132          | -0.022206    |
| C    | 0.42895                      | 0.020539     | 0.428892          | -0.020804    |
| C    | 0.08615                      | -0.132708    | 0.086109          | 0.133476     |
| C    | -0.376592                    | -0.025833    | -0.376571         | 0.025706     |
| C    | -0.322193                    | -0.016399    | -0.322274         | 0.01645      |
| C    | 0.177023                     | -0.07443     | 0.177023          | 0.074515     |
| C    | -0.025163                    | -0.084493    | -0.025073         | 0.084333     |
| O    | -0.659081                    | -0.19665     | -0.658968         | 0.196494     |
| O    | -0.70716                     | -0.165554    | -0.707232         | 0.165631     |
| C    | 0.260135                     | -0.006685    | 0.260211          | 0.057495     |

|   |           |           |           |           |
|---|-----------|-----------|-----------|-----------|
| C | 0.35315   | -0.005622 | 0.353579  | 0.02496   |
| N | 0.091742  | -0.002654 | 0.091674  | 0.003953  |
| N | -0.0164   | -0.015079 | -0.016351 | 0.01507   |
| N | -0.001887 | -0.014135 | -0.001885 | 0.01414   |
| N | -0.432343 | 0.502511  | -0.432763 | 0.495317  |
| O | 0.065143  | 0.470673  | 0.065248  | 0.470552  |
| C | 0.211326  | 0.02057   | 0.211128  | 0.004463  |
| C | 0.231488  | 0.01706   | 0.231458  | -0.003378 |
| C | 0.294439  | 0.011759  | 0.294226  | 0.009538  |
| C | 0.303178  | 0.017431  | 0.3031    | 0.008968  |

## Gas Phase Structure Cartesian Coordinates

### AQ

C -5.5542621361 2.8671730276 -0.0005707914  
 C -5.5553928268 1.4702787275 -0.0003878167  
 C -4.3520608958 0.7711036819 -0.0001580017  
 C -3.1406451909 1.4648425269 -0.0001114188  
 C -3.1395090298 2.8687008519 -0.000294055  
 C -4.3498002778 3.5643996518 -0.0005235729  
 C -1.8609362499 3.6386818962 -0.0002545815  
 C -0.5836115571 2.8666324118 0.0001367729  
 C -0.5847476451 1.4627739964 0.000319575  
 C -1.8633203812 0.6927930205 0.0001231641  
 C 0.6278041074 3.5603712248 0.0003156014  
 C 0.6255435961 0.767075508 0.0006813128  
 C 1.8311359877 2.8611963207 0.000674359  
 C 1.830005553 1.464301978 0.00085741  
 O -1.8599489237 4.8583305143 -0.0002826175  
 O -1.8643074414 -0.526855549 0.0004335117  
 H -6.4933700431 3.4114803037 -0.0007498234  
 H -6.4953804575 0.9274922326 -0.0004249258  
 H -4.3359622897 -0.3139435 -0.0000159935  
 H -4.3319453568 4.6494193146 -0.0006642678  
 H 0.611705495 4.6454184319 0.0001691855  
 H 0.6076888647 -0.3179442134 0.0008177362  
 H 2.7711236541 3.4039828062 0.0008120227  
 H 2.7691134445 0.919994835 0.0011372148

### Aq-STY

C 0.7608793167 -1.5780146054 -6.6399304016  
 C -0.5510961627 -1.6401042634 -6.1622310263  
 C -0.8966922406 -0.9900335953 -4.9824137902  
 C 0.0693910445 -0.2737871363 -4.2736895683  
 C 1.385531441 -0.2116376599 -4.752905148  
 C 1.7271523349 -0.8658869411 -5.937718598  
 C 2.4416240203 0.5468117488 -4.016475131  
 C 2.0475904993 1.2345062594 -2.7523087163  
 C 0.727935208 1.1728706136 -2.2715653202  
 C -0.3266470179 0.4167630976 -3.008834384  
 C 0.3794787565 1.8220142723 -1.0852696761  
 C 1.3550303525 2.52802586 -0.3939307328  
 C 2.6611405179 2.5886124748 -0.8707404348

C 3.0206047466 1.9461524997 -2.0476226643  
O 3.5838034875 0.6004133952 -4.4358640953  
O -1.4711401892 0.3627431548 -2.5962655553  
H 1.0268463045 -2.0866117235 -7.561093867  
H -1.3025245801 -2.1969060675 -6.7129591521  
H -1.9078949303 -1.0223344781 -4.590150798  
H 2.7525831483 -0.801940217 -6.2867898229  
H -0.6484188717 1.7558826347 -0.7395650791  
C 1.2046352261 3.3222861476 0.8806608435  
C 3.5246639052 3.4363185825 0.0297992603  
H 4.031347034 1.9764051439 -2.4452059437  
N 2.6453860996 3.5890150493 1.2454095402  
C 4.8187108439 2.7008834165 0.386920378  
C 3.8561087184 4.7657581759 -0.6642458311  
C 0.5143772413 2.4817630326 1.9587019448  
C 0.391686799 4.5963933611 0.6122521941  
O 2.7848363692 4.8988257183 1.7580314241  
C 3.2347448992 4.9524497047 3.1231898367  
C 4.6128993851 4.343655079 3.3110754477  
C 2.1816963599 4.4357180598 4.0840178042  
C 2.2887787472 3.2056360551 4.7337659107  
H 3.1646277439 2.5836420807 4.5794606006  
C 1.266222084 2.7529329941 5.5678292703  
H 1.3595630873 1.7901868575 6.0607541045  
C 0.1247662214 3.5274884021 5.7614373207  
H -0.67220351 3.1726821041 6.4073812872  
C 0.0140559435 4.7660743284 5.127440827  
H -0.8679979596 5.3800935608 5.2807944222  
C 1.0400756598 5.2148468666 4.3008822072  
H 0.9560353136 6.1788906597 3.8037640054  
H 4.5940731777 1.7904294864 0.949058379  
H 5.4791686402 3.334549507 0.9816927469  
H 5.3571679467 2.4263553389 -0.5258696473  
H 2.9515305284 5.3158225571 -0.9329328011  
H 4.4180337107 4.5552315747 -1.579574148  
H 4.4634527149 5.3982934487 -0.0135916428  
H 1.1345798339 1.6206033499 2.2206580422  
H -0.4496671605 2.1214544481 1.5842363443  
H 0.3245588713 3.0685944384 2.8592640891  
H 0.2834952645 5.1782952512 1.5297073819  
H -0.603324469 4.3105150683 0.257029875  
H 0.8631880058 5.2254176983 -0.1462867282  
H 3.3086585004 6.0366720647 3.2701371382  
H 5.3281504915 4.842040484 2.651533372  
H 4.6072520277 3.2767179925 3.0788362974  
H 4.9425585177 4.4781525883 4.3453284084

Aq-STY radical cation

C 0.569465629 -1.2147661101 -6.8928359072  
C -0.5435859756 -1.6676441625 -6.180190352  
C -0.74914475 -1.2571080433 -4.866813685  
C 0.160468623 -0.3896758217 -4.2604197377  
C 1.28027153 0.0659460084 -4.9773508979  
C 1.4803829451 -0.349910985 -6.2943612984



C 2.2687636341 0.9905466608 -4.3605821582  
C 2.028104185 1.422400698 -2.9423542011  
C 0.9120018684 0.9679466259 -2.2279328126  
C -0.0822616692 0.0335935082 -2.8555733594  
C 0.6989621606 1.3727615694 -0.9091083328  
C 1.6138187223 2.2366920979 -0.3268228154  
C 2.7213072079 2.6907595047 -1.0392705212  
C 2.9441785401 2.2918903382 -2.348035919  
O 3.2442224959 1.3965502225 -4.9610116262  
O -1.042754031 -0.3488277582 -2.2162921932  
H 0.724997161 -1.5380021853 -7.9167638455  
H -1.2507364632 -2.3419410309 -6.6517236095  
H -1.6065901835 -1.5963826565 -4.2950175006  
H 2.3514065367 0.0139815659 -6.829325942  
H -0.1784963379 0.9968579472 -0.3889576419  
C 1.5533147768 2.7782822018 1.087565875  
C 3.5626998634 3.6323433938 -0.2223289247  
H 3.7980724502 2.6271774406 -2.9311028158  
N 2.8461265339 3.5631912961 1.0903237031  
C 4.9984238086 3.1427711538 -0.0036932643  
C 3.5310859115 5.0670325834 -0.7648148405  
C 1.5433394539 1.633370633 2.1020612259  
C 0.3683367494 3.7331318794 1.2854292013  
O 3.1969670868 4.5219143684 1.9051971727  
C 3.3554696324 4.3721687673 3.4052246972  
C 4.1829559055 3.1412386157 3.7021315904  
C 2.0517775609 4.5658974625 4.1301938085  
C 1.5441989268 3.6211271995 5.0231356433  
H 2.0848562208 2.6997711118 5.2205917661  
C 0.3404779687 3.8606290635 5.6871025366  
H -0.0467542184 3.123001822 6.3818720069  
C -0.3550505766 5.0465158568 5.4659334643  
H -1.2903982207 5.2311857141 5.9836858224  
C 0.1626156953 6.0081070883 4.5951030429  
H -0.3656611446 6.9425327958 4.4383103978  
C 1.365619677 5.7722487503 3.9404238525  
H 1.7736981867 6.5230430458 3.2674437363  
H 5.0112167266 2.132779374 0.4144337126  
H 5.5382239352 3.8269300454 0.6564015829  
H 5.5091351951 3.1220075789 -0.9697083818  
H 2.5038552043 5.4273768038 -0.8597853938  
H 3.9854726846 5.0607022688 -1.7585288909  
H 4.0997623651 5.7408707187 -0.1217566253  
H 2.4185988456 0.9901468434 1.9809225033  
H 0.6532048653 1.0307356028 1.9033697152  
H 1.4710697329 2.0017219359 3.1247394489  
H 0.2897320947 4.0668458689 2.3205886509  
H -0.5392916806 3.1816810476 1.0256390375  
H 0.4428911579 4.5984942861 0.6220462738  
H 3.9702839833 5.2644231343 3.5481969133  
H 5.0940492869 3.1476592046 3.1005046144  
H 3.6428126302 2.2108717297 3.5239114406  
H 4.4750988958 3.1730333197 4.7550000573

Aq-EIB

C 0.6623087776 -1.8920325531 -6.1472596426  
C -0.6278074522 -1.9216000695 -5.6106076367  
C -0.9289554876 -1.1793129 -4.4738325256  
C 0.0598789658 -0.4026753682 -3.8675992973  
C 1.3540843616 -0.3729208517 -4.4060626087  
C 1.6511436944 -1.1200913341 -5.5471267612  
C 2.4334046762 0.4489477011 -3.7798270277  
C 2.0862937199 1.2374374616 -2.5613076267  
C 0.7887372712 1.2079308673 -2.021146658  
C -0.2884981632 0.3859867019 -2.6470402744  
C 0.4842392137 1.9509156806 -0.8787360498  
C 1.4812408956 2.717710412 -0.2907908355  
C 2.7653186993 2.7474891555 -0.8268824744  
C 3.0812364202 2.0114234314 -1.9606189977  
O 3.5569012026 0.4732710393 -4.2492490737  
O -1.4130079974 0.3573038155 -2.1806965121  
H 0.8935679403 -2.4726051842 -7.0346016252  
H -1.3970519554 -2.5250284193 -6.0818426962  
H -1.9224192315 -1.1848256694 -4.0374368994  
H 2.6603274713 -1.0795990999 -5.9438028468  
H -0.5275270796 1.9079677369 -0.4848973399  
C 1.3771291447 3.6073931741 0.9232024323  
C 3.6590141628 3.6718458522 -0.0377979826  
H 4.0741660114 2.0147669715 -2.4019396378  
N 2.8265427118 3.9307786131 1.1910472235  
C 4.9676390892 2.9738434047 0.3392352589  
C 3.9554850942 4.9370282532 -0.8561809476  
C 0.7856900711 2.832691246 2.1058652389  
C 0.5186870778 4.8412358562 0.6153569734  
O 2.9688079972 5.2855533538 1.567472136  
C 3.4367723755 5.4871030687 2.9068077013  
H 4.7654812281 2.1027156735 0.9680515829  
H 5.6320768398 3.6531963477 0.8765776976  
H 5.4893936107 2.6422411977 -0.5642691775  
H 3.0375480365 5.4648161588 -1.1249044506  
H 4.4725641253 4.6481152411 -1.7764096672  
H 4.5937575638 5.6204636652 -0.2917911397  
H 1.4580285073 2.0222725408 2.4002286259  
H -0.1837875612 2.4060774923 1.8282726733  
H 0.6186817449 3.4976209987 2.9546973812  
H 0.4656827266 5.4948995431 1.4885950986  
H -0.4915213743 4.5092875328 0.3555206678  
H 0.9228770543 5.4082214269 -0.2268946812  
C 3.6018413646 7.0022521541 2.9920881908  
H 4.3518872164 7.3202947596 2.2634706569  
H 3.9326822831 7.2935272705 3.9928495177  
H 2.6507678778 7.4914107471 2.7747240183  
C 2.313321057 5.0938476178 3.8829062434  
O 1.2293696003 5.6306236008 3.8935350501  
O 2.6566759257 4.1151428607 4.7259458823  
C 1.6640078743 3.738236651 5.696447256  
C 2.2535502633 2.6233026625 6.5313200603  
H 0.7593033672 3.4222245163 5.1688942078

H 1.4117902835 4.6194907466 6.2938392795  
H 2.5034052279 1.7645459597 5.9035341804  
H 1.5300848282 2.3036225495 7.2856045233  
H 3.1606879247 2.9581979818 7.0401070785  
C 4.7441098982 4.7650023527 3.1869154797  
H 5.5079711492 5.1408262069 2.5002458865  
H 4.6310535678 3.6880163689 3.0591050408  
H 5.0684981109 4.9627148274 4.2113598501

Aq-EIB radical cation

C 0.644708161 -1.7929942543 -6.3487214352  
C -0.4828853328 -2.1263415353 -5.594234089  
C -0.706290071 -1.5193645806 -4.3623525442  
C 0.1998574573 -0.5739460028 -3.8801026674  
C 1.33431056 -0.2386424045 -4.639200932  
C 1.5524684693 -0.8516078192 -5.8737281998  
C 2.3198714722 0.7637566912 -4.1539621151  
C 2.058675276 1.4103989273 -2.8237014092  
C 0.9284442308 1.0764442659 -2.0672854964  
C -0.0614346354 0.0598430465 -2.560447283  
C 0.6946140008 1.6826306724 -0.8308116743  
C 1.6066424561 2.6201971134 -0.3735990783  
C 2.7325029719 2.9520424782 -1.1274667476  
C 2.9733498474 2.3556908755 -2.3544439102  
O 3.3091809076 1.0670237407 -4.7913183847  
O -1.0329073432 -0.2174354126 -1.8847431706  
H 0.8140282032 -2.2692652379 -7.308704373  
H -1.1875494753 -2.8609977137 -5.969471741  
H -1.5752682425 -1.7633210114 -3.760166808  
H 2.4345912427 -0.5778985818 -6.4431399728  
H -0.1960376341 1.399177046 -0.2761270592  
C 1.5144802592 3.4141519509 0.9121317129  
C 3.5786782802 3.9895847667 -0.4385626156  
H 3.8402980005 2.5898401888 -2.9668081669  
N 2.8702009917 4.0729079909 0.873152243  
C 5.0193721261 3.5330270851 -0.1850562968  
C 3.5459323435 5.3568801706 -1.1394081117  
C 1.2983398978 2.5109034068 2.126580995  
C 0.4442851676 4.517956402 0.8007366985  
O 3.2816390612 5.0571759915 1.6353164796  
C 3.5896361586 4.8904141645 3.0880492247  
H 5.0445697829 2.5760076201 0.3420129217  
H 5.567097044 4.2903215291 0.3822876968  
H 5.5128822083 3.40640941 -1.1517815771  
H 2.521054666 5.6974888179 -1.2984719645  
H 4.0264038005 5.2439714407 -2.1142655338  
H 4.0938461394 6.1009192727 -0.557868858  
H 2.0448516544 1.715056295 2.1679055628  
H 0.3180713242 2.0423244719 2.0080368473  
H 1.2783296975 3.0611463786 3.068188298  
H 0.451693749 5.1698627108 1.6735571912  
H -0.524430735 4.0165827119 0.7242115826  
H 0.5916935825 5.1080358126 -0.1060525393  
C 4.44455688 6.1229460353 3.3615690778

H 5.3685095968 6.0716550011 2.7809907538  
H 4.6969191018 6.1488247028 4.4245469118  
H 3.8963126446 7.0313906895 3.1037203698  
C 2.298627881 5.045870785 3.8996103497  
O 1.3682323187 5.7238821856 3.5406803142  
O 2.3876164965 4.4124709173 5.0590122078  
C 1.2758631459 4.6004878955 5.9794195749  
C 1.6065812136 3.844931135 7.2441784669  
H 0.371581582 4.2274396632 5.4905796602  
H 1.1578973819 5.6738882518 6.1461486153  
H 1.7350277143 2.7792937983 7.0417893166  
H 0.789161453 3.9630122185 7.9590873067  
H 2.5203434106 4.2309086239 7.7010756639  
C 4.3491373005 3.5964453483 3.3112088964  
H 5.2557386867 3.5925441437 2.7027653622  
H 3.7494710309 2.7144367563 3.0825991938  
H 4.6337644395 3.5443529563 4.3631252591

Aq-EP

C 0.8891628951 -1.8049347421 -6.4907112389  
C -0.3903453558 -1.9711704615 -5.9535878095  
C -0.7497447706 -1.3069707102 -4.7858293809  
C 0.1699716801 -0.472137239 -4.1488866296  
C 1.4535551848 -0.3055477848 -4.687587516  
C 1.8092498599 -0.9745434475 -5.8599726944  
C 2.4593184557 0.5810200056 -4.0280989425  
C 2.0505858842 1.2836422738 -2.7765946473  
C 0.764025905 1.1169758629 -2.2360327861  
C -0.2398946515 0.2306181222 -2.895343035  
C 0.4004383181 1.7782973604 -1.0597802838  
C 1.3274911646 2.6042420003 -0.4409330382  
C 2.603475114 2.7727503044 -0.9822579562  
C 2.977501675 2.1179146853 -2.145921853  
O 3.5739538222 0.7241433499 -4.4975489825  
O -1.3553263659 0.0836942181 -2.429557275  
H 1.1659588013 -2.3248110739 -7.4023337864  
H -1.1056997298 -2.6201757504 -6.4485718581  
H -1.7364482215 -1.4187190766 -4.348388538  
H 2.8088003458 -0.8283040967 -6.256152708  
H -0.599460471 1.6245472084 -0.6634976057  
C 1.1629047166 3.4109499124 0.8263602945  
C 3.4003503715 3.7533336813 -0.1593404947  
H 3.9644130192 2.228958271 -2.5868667676  
N 2.5893735654 3.7819150598 1.0953858791  
C 4.8072797157 3.2602771521 0.1780263853  
C 3.483068362 5.1039627816 -0.8887129437  
C 0.6390295122 2.5395435184 1.971521753  
C 0.2352246171 4.6149668293 0.6189073963  
O 2.7053001755 5.0531644364 1.6917405955  
C 3.3089418309 4.9826743891 2.9671116984  
H 4.7623206881 2.2848064296 0.6680902636  
H 5.2941948518 3.9730705895 0.8529085341  
H 5.4213377699 3.1809064237 -0.7247611019  
H 2.4921431789 5.4974684552 -1.1235174821

H 4.0286370925 4.9666219664 -1.8273720617  
H 4.0113956622 5.8378038027 -0.2761812445  
H 1.3140038806 1.6970206463 2.1427248257  
H -0.3561079419 2.152332344 1.7291091094  
H 0.553175754 3.1318216409 2.8852429809  
H 0.1973592739 5.2089236099 1.5349658759  
H -0.7701564012 4.2523644999 0.3831625008  
H 0.5710600223 5.2501478586 -0.2035698725  
C 4.1141100547 6.2633094057 3.1653104565  
H 4.9009049834 6.3188611677 2.4092423887  
H 4.569614398 6.2793685142 4.1579898342  
H 3.4598560125 7.1322397312 3.0552614169  
C 2.2491589883 4.8839650104 4.05945376  
O 1.0942280364 5.2144796492 3.9428615581  
O 2.7835065667 4.4216553843 5.1981975286  
C 1.8909639528 4.3421667271 6.3244528206  
C 2.6882329766 3.8123580985 7.4954596192  
H 1.0582129073 3.683949875 6.0598207379  
H 1.4832244953 5.3388381166 6.5168141268  
H 3.093321005 2.8229642081 7.270334152  
H 2.0445448404 3.7321166424 8.3751280367  
H 3.5181024335 4.4822913212 7.7330871722  
H 3.950139092 4.0972908418 3.0237988326

#### Aq-EP radical cation

C 0.5702838077 -1.6250368098 -6.5169630102  
C -0.4796055418 -2.0808253267 -5.7158325815  
C -0.6656246926 -1.557801083 -4.4400167172  
C 0.2001653841 -0.5740252292 -3.9604237141  
C 1.2564405473 -0.1153786417 -4.7664983015  
C 1.4374652696 -0.6446589605 -6.0449676755  
C 2.1969362126 0.9312552085 -4.2855336191  
C 1.9770579913 1.4853170676 -2.9065026485  
C 0.9253948493 1.027796316 -2.1034981481  
C -0.0198829528 -0.0320122697 -2.5934897816  
C 0.7294235012 1.5479107463 -0.8218710058  
C 1.600889514 2.5235529268 -0.3666975157  
C 2.6490272553 2.9801606423 -1.1680880859  
C 2.850641688 2.470434621 -2.4400144716  
O 3.1186651415 1.3415082208 -4.9628532601  
O -0.9239609176 -0.4149235721 -1.8770936347  
H 0.7107751092 -2.0363471213 -7.5110265526  
H -1.1528284952 -2.8453887486 -6.0890069728  
H -1.4742360437 -1.8973701406 -3.8011617834  
H 2.2592097196 -0.2764136644 -6.6502954811  
H -0.1025475591 1.1702314861 -0.233194819  
C 1.5272580726 3.2499571204 0.9611638484  
C 3.4697817183 4.0353863254 -0.4713948085  
H 3.6570604398 2.8012156539 -3.0894277897  
N 2.8302615815 3.9954965182 0.8730891465  
C 4.945277315 3.652322218 -0.3083433844  
C 3.316937048 5.4347125621 -1.086007614  
C 1.4478336747 2.2977071112 2.1556094622  
C 0.3774767799 4.2761033761 0.9585327039

O 3.3017660335 4.874006798 1.7211326949  
C 3.4724267558 4.5078931943 3.1331335125  
H 5.0478257654 2.67860667 0.1779183905  
H 5.4784218768 4.415291869 0.2639791787  
H 5.3963289599 3.5883131799 -1.3014592139  
H 2.2659229138 5.7123395288 -1.1861035806  
H 3.7648843019 5.4150904443 -2.0824827437  
H 3.8370906629 6.1794060301 -0.4797108272  
H 2.3210702689 1.6423127423 2.2078259461  
H 0.5673470428 1.6672520604 2.0096053626  
H 1.3101960378 2.823849306 3.1028926105  
H 0.4046652467 4.9133255331 1.8425959568  
H -0.5574697379 3.7087608224 0.9440418998  
H 0.4123551876 4.8947189167 0.0596043404  
C 4.7562615647 5.1943850718 3.5671428304  
H 5.6013304046 4.8211357891 2.9863038918  
H 4.9294664257 4.9771867571 4.6231947236  
H 4.6698918371 6.2752105287 3.4339732653  
C 2.2819141217 5.0124045508 3.9425516595  
O 1.4813413626 5.8170174396 3.5390131033  
O 2.3024852958 4.4593674425 5.1441825651  
C 1.2770460721 4.9042443617 6.0783827063  
C 1.5134742498 4.1812545053 7.3825483124  
H 0.3034447681 4.6722503827 5.6388069683  
H 1.3630124358 5.9891044714 6.1752752867  
H 1.4395556355 3.0997111875 7.2496579985  
H 0.758078768 4.4912173279 8.1081943972  
H 2.4984465645 4.4212648951 7.7885190809  
H 3.5557827606 3.4216116405 3.1956478989

#### Aq-Me

C 0.9028986996 -2.0177450782 -6.1665972649  
C -0.3732905981 -2.1556390731 -5.613879808  
C -0.7304446723 -1.4210494529 -4.4883632559  
C 0.1882749072 -0.5439233093 -3.9095468772  
C 1.4685219714 -0.4055924676 -4.4640206263  
C 1.8219452281 -1.1452621002 -5.5938014811  
C 2.4731544023 0.5250043549 -3.8664548589  
C 2.0680914088 1.301204515 -2.6575229102  
C 0.785184148 1.1625754513 -2.1018860112  
C -0.2186118526 0.234168179 -2.7006623879  
C 0.4236954407 1.8947685648 -0.9669919013  
C 1.3514567517 2.7577547323 -0.4048659935  
C 2.6282600914 2.8957388166 -0.9578740864  
C 2.997228841 2.1728700108 -2.0816145381  
O 3.5841291727 0.6449619564 -4.3504816133  
O -1.3316445547 0.1138292981 -2.2214826873  
H 1.1780646411 -2.5928498542 -7.0449153631  
H -1.0877828648 -2.8376790395 -6.0635761267  
H -1.7145860762 -1.509747044 -4.0400003963  
H 2.8188942973 -1.0199033627 -6.0034463209  
H -0.5744369663 1.7638640071 -0.5581364154  
C 1.1905813169 3.6655645835 0.7916953668  
C 3.4363396964 3.9082909603 -0.180998696

H 3.9825834355 2.2562983953 -2.5318167275  
N 2.6208687896 3.9842356118 1.0643107745  
C 4.8371839508 3.4068487622 0.1728386718  
C 3.5438649347 5.231021161 -0.9563150024  
C 0.6013078688 2.9489675762 2.0075552754  
C 0.320290006 4.8825858521 0.4399444292  
O 2.756011467 5.2359209175 1.6886462237  
C 3.3312697634 5.0723866918 2.9758155191  
H 4.7751239069 2.4689276123 0.7295477826  
H 5.3519764399 4.1517438402 0.7880926164  
H 5.4341810961 3.2496809469 -0.731200106  
H 2.5673035259 5.6057617255 -1.2668822045  
H 4.147206197 5.0704008928 -1.8550625419  
H 4.0265237051 5.9898344111 -0.3364532759  
H 1.2139268138 2.0839461886 2.2719506261  
H -0.4219818177 2.6167141258 1.8053735806  
H 0.5678607289 3.6345682608 2.8603449261  
H 0.3091001766 5.5880280551 1.2737335954  
H -0.7027811864 4.5461378443 0.2457920928  
H 0.6802683273 5.4017816838 -0.4496670981  
H 4.3267555934 4.6220115451 2.9072016624  
H 2.6983215188 4.4459398651 3.612604204  
H 3.4053113289 6.0771333863 3.3974792295

#### Aq-Me radical cation

C 0.7656839956 -1.9434680994 -6.188959717  
C -0.4772618108 -2.0996956118 -5.5705386312  
C -0.7803727048 -1.3849643235 -4.4158369183  
C 0.1616586788 -0.5090867814 -3.8747031724  
C 1.412479165 -0.3518681655 -4.497123692  
C 1.7097070923 -1.0719824947 -5.6548423286  
C 2.4388519872 0.5725040012 -3.947342629  
C 2.0923247257 1.3364744553 -2.7003398755  
C 0.8467538785 1.179133652 -2.080378114  
C -0.1865195459 0.2426771923 -2.6406447561  
C 0.5344320383 1.8913541526 -0.9206276314  
C 1.4848716142 2.7564394875 -0.402536571  
C 2.724538405 2.915458369 -1.0222726323  
C 3.0441170216 2.2104161175 -2.1713782817  
O 3.5267666202 0.7250682167 -4.4663170732  
O -1.2600086095 0.1247580676 -2.0832326254  
H 0.9966559411 -2.5033330631 -7.0890710732  
H -1.2096429516 -2.7805613173 -5.9912999032  
H -1.7394588686 -1.4913477328 -3.9197260708  
H 2.6809108929 -0.9356121242 -6.1190368274  
H -0.4440423236 1.7411509294 -0.4710220203  
C 1.3247374905 3.6277178126 0.8294422184  
C 3.5975211784 3.9073268627 -0.2977593026  
H 4.0006645351 2.307764882 -2.6783979615  
N 2.7119221529 4.2073252116 0.8649923524  
C 4.903697885 3.3026611705 0.2297302713  
C 3.8479796978 5.1890729093 -1.1034278374  
C 1.0060919531 2.7907489804 2.0747433686  
C 0.3015031948 4.7481951363 0.5843173276

O 3.1429014521 5.1812626227 1.6227097174  
C 2.6323489802 5.3180812363 2.9742036664  
H 4.7101967679 2.4060419658 0.8237082445  
H 5.4526142531 4.0339711361 0.8277317627  
H 5.5225656088 3.0207105159 -0.6256134206  
H 2.9081973264 5.6367967022 -1.4353138734  
H 4.4317297985 4.9227731944 -1.9878096652  
H 4.4148274443 5.9136884154 -0.515216077  
H 1.8266946707 2.108603744 2.3115151653  
H 0.1250109925 2.185773665 1.8470732256  
H 0.7662285962 3.4029712426 2.9447863905  
H 0.1878399919 5.4120160637 1.4431709371  
H -0.6654992627 4.2729782478 0.3988275627  
H 0.5667146113 5.3355507613 -0.2973961501  
H 2.8477559022 4.4024064862 3.5255434406  
H 1.5690950852 5.5494253215 2.9636155773  
H 3.2026144523 6.1547007861 3.3704636035

#### 1,2-DHAQ Aq-STY

C -4.0297027918 2.48205407 0.0543584543  
C -3.9307090098 1.1135754537 -0.1771085063  
C -2.692437521 0.5015760453 -0.3266528754  
C -1.5391204504 1.281698516 -0.2424570062  
C -1.639742691 2.6647527669 -0.0091172395  
C -2.8898932936 3.269843791 0.1412371805  
C -0.4222035805 3.5074695611 0.084943356  
C 0.8904440696 2.8580271107 -0.0698117372  
C 1.0042399998 1.4679087167 -0.3046617141  
C -0.2092011999 0.6155843087 -0.4032478352  
C 2.0488027383 3.6346953522 0.0180348768  
C 3.3158104117 3.029965221 -0.1269240855  
C 3.4127319342 1.6668693618 -0.3564870347  
C 2.2562497358 0.8875172274 -0.4451510728  
O -0.5111224176 4.7218528565 0.2882690715  
O -0.1330028284 -0.5836154598 -0.6073390191  
C -5.4720623388 2.914093465 0.1569676696  
C -5.2979017741 0.4825669034 -0.2632703444  
H -2.5843077684 -0.5640553938 -0.5089323565  
H -2.9343602686 4.3402609586 0.3208502204  
O 2.0617959788 4.9626088864 0.2378239849  
O 4.4250778009 3.7918136823 -0.0396334004  
H 4.3994536986 1.2293597403 -0.4636085198  
H 2.3156822186 -0.1803950496 -0.6245359959  
H 1.1250559214 5.2578008952 0.3199917808  
H 4.1592522936 4.7097385516 0.1216486103  
N -6.1802443708 1.5851305453 0.2656848671  
O -7.3844350119 1.6120435621 -0.4734982194  
C -8.5695674224 1.4370135523 0.3234044728  
C -5.868556162 3.7227768105 -1.0859971182  
C -5.6918520857 3.7553239396 1.4175904589  
C -5.3801332208 -0.7544628938 0.6344261574  
C -5.6006814582 0.0918774576 -1.717604733  
H -9.3413126345 1.4500312516 -0.4555449212  
H -5.7314658272 3.1475866701 -2.0045295761



H -5.2402045045 4.617444125 -1.139139571  
H -6.913805931 4.0311188786 -1.020565105  
H -5.502395047 3.154065891 2.3105828505  
H -6.7103867493 4.1448138421 1.4627357523  
H -5.0067288218 4.6098406014 1.4152470489  
H -5.2400486783 -0.4727804062 1.6815111172  
H -4.6013687285 -1.4716966057 0.3561546675  
H -6.3439702921 -1.2548519888 0.5246863076  
H -5.5501786102 0.9549315681 -2.385129529  
H -6.5969419431 -0.347731799 -1.7976715778  
H -4.8607056851 -0.6442999943 -2.0466911354  
C -8.6112024534 0.0906547307 1.0237367279  
C -8.8200532539 2.6265597306 1.2296592631  
C -9.2450375001 3.8267573127 0.6496882702  
H -9.4162027457 3.8633491311 -0.4240827623  
C -9.4353485061 4.9675652487 1.4241173856  
H -9.7601440397 5.8926530255 0.9579863992  
C -9.2127221495 4.916988195 2.8011555649  
H -9.3601984615 5.8035290389 3.409908487  
C -8.8089639324 3.7215617661 3.3913050128  
H -8.6376728664 3.6750370735 4.4623150893  
C -8.6144479302 2.5829458738 2.6090331813  
H -8.283590136 1.6632707417 3.0807163196  
H -8.5230350426 -0.7107409477 0.2855520196  
H -9.5622299875 -0.0265712543 1.5511883044  
H -7.7953266778 -0.0048622126 1.7431120609

#### 1,2-DHAQ Aq-EIB

C -4.0297778033 2.6131410094 0.005167818  
C -3.9774716572 1.2222753093 -0.0121888163  
C -2.7600719882 0.5534696927 -0.0054245409  
C -1.5810197725 1.2988039305 0.0159591353  
C -1.6349491889 2.7037261674 0.0325832342  
C -2.8647781905 3.3668617469 0.0282871693  
C -0.3893695486 3.5098076743 0.0575496055  
C 0.9011044826 2.8008809681 0.067177155  
C 0.9683610696 1.3880354968 0.0503954061  
C -0.2729237502 0.5718152026 0.0218926598  
C 2.0852041559 3.5424253497 0.0934554511  
C 3.3317381571 2.880327264 0.1030969059  
C 3.3828895805 1.4956740921 0.0865628686  
C 2.2006297706 0.7512899283 0.0602324783  
O -0.4387062665 4.7432053705 0.0701693155  
O -0.2373970371 -0.6462317907 0.0036281419  
C -5.4571612222 3.1016632107 -0.0303046372  
C -5.3637426023 0.6306000077 -0.0642824049  
H -2.6881917601 -0.5305832841 -0.0174581658  
H -2.8729821638 4.4531399584 0.0421605678  
O 2.1430818213 4.8870165942 0.1110454737  
O 4.4661830985 3.6085964825 0.1283422872  
H 4.3546855661 1.0139708145 0.0945688703  
H 2.224335599 -0.3328802027 0.0471057508  
H 1.2170794255 5.2235746163 0.1011546344  
H 4.2318342453 4.548952466 0.1380941774

N -6.2175222207 1.8314051606 0.2469064044  
O -7.3974785909 1.8134654209 -0.5300747199  
C -8.6144580662 1.6965560501 0.2185952233  
C -5.7707856421 3.7207245117 -1.4001225132  
C -5.70604414 4.1288971548 1.0763063235  
C -5.5397079834 -0.4264471214 1.0289534649  
C -5.625889739 0.0282194524 -1.4517093929  
C -9.6965223738 1.9201516665 -0.8383033576  
C -8.7278991443 2.7010533436 1.3512643808  
C -8.7823538892 0.274715088 0.7776134399  
H -5.6120074884 3.0063548025 -2.2110062543  
H -5.1106076523 4.5789653197 -1.5594020176  
H -6.8078058441 4.0614153869 -1.4389633928  
H -5.5417995574 3.6774272096 2.0581232141  
H -6.7257968022 4.5148831913 1.0293486211  
H -5.0237146751 4.9770741733 0.9595852816  
H -5.3752422657 0.0174183391 2.0136697642  
H -4.8264270212 -1.2446886244 0.8836567579  
H -6.5439071462 -0.8512149918 1.0024981419  
H -5.4698774725 0.7663412111 -2.2422579885  
H -6.6500035161 -0.3423106622 -1.516762833  
H -4.9283124482 -0.8000234941 -1.6137470297  
O -8.6350558978 -0.65835246 -0.1753383717  
C -8.8399355722 -2.0209590819 0.2371483924  
C -8.360305051 -2.9095401423 -0.8893493074  
O -9.0642514455 0.0142512415 1.922610189  
H -9.5678659594 1.2188812531 -1.6647514755  
H -9.6163002142 2.9419387243 -1.2182795251  
H -10.6891578562 1.7827619786 -0.4003487861  
H -8.7163148233 3.7120373042 0.9360859931  
H -7.907259697 2.5807871615 2.0596840845  
H -9.6686611042 2.5475228279 1.8836108934  
H -9.9045654625 -2.158266302 0.4513799526  
H -8.2891264355 -2.1977705161 1.1656619655  
H -8.8950224232 -2.6852064864 -1.815585048  
H -8.5319385356 -3.9581398767 -0.6333554398  
H -7.2900098637 -2.7664862893 -1.0620855756

#### 1,2-DHAQ Aq-EP

C -3.9966477107 2.5450894798 -0.0969563907  
C -3.909731473 1.1516191335 -0.108287659  
C -2.6769127886 0.5158617537 -0.0605101475  
C -1.5186758761 1.2929751722 -0.0003354577  
C -1.608765775 2.6955292372 0.0172503273  
C -2.85459228 3.3283369021 -0.031646747  
C -0.3854468932 3.5328391055 0.0887989495  
C 0.9215604661 2.857043459 0.1408228589  
C 1.0251961347 1.4464313335 0.1224033457  
C -0.1932131296 0.5994336567 0.0492109656  
C 2.084862473 3.6281371203 0.2098394758  
C 3.3467573731 2.9976387679 0.260198013  
C 3.4335320636 1.6147774786 0.2412258731  
C 2.2721252 0.8408992394 0.1724012682  
O -0.4671495038 4.764381232 0.1037959082

O -0.1265219054 -0.6172430556 0.0293196035  
C -5.4345100315 2.9866935026 -0.209478728  
C -5.2828659594 0.5247334277 -0.1792702922  
H -2.5759845063 -0.5659044967 -0.0666173078  
H -2.8930265852 4.413993707 -0.0172551498  
O 2.1081775102 4.973671054 0.2331576202  
O 4.4608524894 3.7540662216 0.3263635634  
H 4.4164146207 1.1577696306 0.2809166314  
H 2.3237140589 -0.2422690419 0.1567453493  
H 1.1751303873 5.2872568289 0.1928628942  
H 4.2028485394 4.6882550864 0.3296513244  
N -6.1366760227 1.7131027168 0.1322050101  
O -7.3755229237 1.6661854012 -0.5364668044  
C -8.4596167737 1.6535711708 0.377062885  
C -5.7171480534 3.5023751117 -1.6297589742  
C -5.8229120984 4.0527173343 0.8148086405  
C -5.464925059 -0.533514965 0.9124278046  
C -5.5495516208 -0.0913777044 -1.5594340088  
C -9.6553445434 2.267830847 -0.3407208425  
C -8.8246695365 0.248996594 0.8438691534  
H -5.4631946273 2.7598219694 -2.3887450407  
H -5.1118007003 4.3960835718 -1.8097731165  
H -6.7723527186 3.7622631689 -1.7381196905  
H -5.6087759992 3.7044897273 1.8279088782  
H -6.8938296415 4.2687469311 0.7340108491  
H -5.2799094991 4.9856279018 0.6324104006  
H -5.3071833888 -0.0918084996 1.8990344712  
H -4.7542969971 -1.3545373937 0.7711133347  
H -6.4729505121 -0.9527337896 0.8680890079  
H -5.3797559111 0.6253747551 -2.365507263  
H -6.583880375 -0.4391492473 -1.6112773247  
H -4.8742551365 -0.9398807328 -1.7087997743  
O -8.6506100282 -0.6708372989 -0.1133449759  
C -8.9958406688 -2.0209337824 0.2440604729  
C -8.5234713844 -2.9151191679 -0.8809761045  
O -9.2771565972 0.0080790544 1.9377992602  
H -9.8699037331 1.7073370715 -1.2542676436  
H -9.4272591064 3.3024877306 -0.607818805  
H -10.5355641832 2.2512685935 0.3063261298  
H -10.0784367611 -2.0746277059 0.393910542  
H -8.5147203239 -2.2646272845 1.1963826004  
H -8.9907634253 -2.628227633 -1.8261889678  
H -8.7840833287 -3.9542145408 -0.6644646844  
H -7.437978177 -2.847081862 -0.9953771809  
H -8.1958870433 2.2200160205 1.2746656695

1,2-DHAQ Aq-Me

C -4.0907549644 2.6091763938 -0.0363218929  
C -4.0453089869 1.2144415466 -0.119536512  
C -2.8330530777 0.5402281597 -0.1314026439  
C -1.6500603446 1.2790844734 -0.0605628417  
C -1.6966852973 2.6811481289 0.0234292111  
C -2.9235151854 3.3530181816 0.036860767  
C -0.4467128853 3.4773475195 0.1025667236

C 0.8399996976 2.761429742 0.0911224625  
C 0.8994793488 1.3507853778 0.0068433751  
C -0.3460851251 0.5447881395 -0.073287339  
C 2.0279774017 3.4934991553 0.1654441511  
C 3.2705012226 2.8238846936 0.1557021086  
C 3.313964079 1.4413346846 0.0727460848  
C 2.1277961654 0.7065036771 -0.0015145961  
O -0.4895643584 4.7088025264 0.1759512114  
O -0.3172079718 -0.6712995003 -0.1475181098  
C -5.520230824 3.0968255865 -0.0667841399  
C -5.4403477308 0.6431841118 -0.2128011808  
H -2.7668322328 -0.5425311285 -0.1923195221  
H -2.9271670511 4.4372303919 0.1056229855  
O 2.0933497926 4.8353521139 0.2488577224  
O 4.4088328237 3.5429573737 0.2278641037  
H 4.2828348807 0.9537650796 0.0674173191  
H 2.1452435377 -0.3759065193 -0.0668451513  
H 1.1694843719 5.1776127531 0.2468064356  
H 4.1798909309 4.483287059 0.2794449815  
N -6.2304600594 1.8229509185 0.2401828074  
O -7.523570792 1.8134843102 -0.3093604878  
C -8.4875370316 1.7193796324 0.7283956439  
C -5.860578211 3.7041812363 -1.4369523201  
C -5.8259250951 4.1132486773 1.0343388606  
C -5.674996293 -0.5147477453 0.7583472656  
C -5.7444061287 0.1819765318 -1.6472067973  
H -9.4595799542 1.7157672838 0.2306237773  
H -8.4189102034 2.5752974543 1.40749377  
H -8.3584541738 0.796120991 1.3022607323  
H -5.6175219917 3.0279491229 -2.2580312243  
H -5.2845276397 4.6246555437 -1.5732726636  
H -6.9253338279 3.9424264219 -1.4863802909  
H -5.5937494579 3.6917830073 2.015117391  
H -6.8867513003 4.3818317576 1.0054066145  
H -5.2454553824 5.0301937042 0.8899751234  
H -5.4668397033 -0.1989559717 1.7832316023  
H -5.0366022174 -1.3680701102 0.5081994883  
H -6.716327169 -0.8459703965 0.6933285084  
H -5.549669534 0.9656922594 -2.3809979926  
H -6.7912605934 -0.1185662817 -1.7289882454  
H -5.1090214578 -0.6753980684 -1.8893572767

1,2,4-THAQ Aq-STY

C -3.9105548785 2.5083059995 0.1201162324  
C -3.8093088545 1.1388389485 -0.1059134217  
C -2.5707222573 0.5285937778 -0.257406428  
C -1.419045429 1.3128155463 -0.1803663032  
C -1.5214085228 2.6970392222 0.0480976345  
C -2.772362527 3.2992815146 0.2002398733  
C -0.3043575159 3.5390343438 0.133850616  
C 1.003619267 2.8870661498 -0.0249384818  
C 1.1034644033 1.4829605878 -0.2570243238  
C -0.0919586605 0.6557683707 -0.3423150302

C 2.1492666775 3.6619437133 0.0542403499  
C 3.4265929634 3.050235782 -0.0966364034  
C 3.5332953284 1.6977818446 -0.3204036944  
C 2.3729118035 0.9014126464 -0.4027925465  
O -0.3912882439 4.7556832275 0.3336488486  
O -0.029806802 -0.564507662 -0.5437076966  
C -5.3534893948 2.9374237981 0.2250411989  
C -5.1753199498 0.5043810684 -0.1843108853  
H -2.4621385586 -0.5374421575 -0.4356895027  
H -2.8182598667 4.3703100255 0.3758122222  
O 2.1716234787 4.990209867 0.2686008789  
O 4.5250103753 3.8204644184 -0.0162473099  
H 4.5071553986 1.2361315175 -0.4344737467  
O 2.5458655673 -0.4039862518 -0.6217476607  
H 1.2340243837 5.2869559635 0.3545887116  
H 4.2514175337 4.7369802904 0.1432090204  
H 1.6527008684 -0.8209296878 -0.6536043387  
N -6.0582670473 1.6074453664 0.3425401383  
O -7.2647752102 1.627853946 -0.3928049624  
C -8.4470880777 1.4541099955 0.408780182  
C -5.7551397991 3.7389284511 -1.0210170125  
C -5.5709848407 3.7847203615 1.4819999928  
C -5.2517734474 -0.7283691398 0.7197951463  
C -5.4823717848 0.1059611418 -1.6356363231  
H -9.2211241156 1.4604302877 -0.3679555344  
C -8.4828750753 0.1117548339 1.1170947198  
H -5.620180053 3.1591507984 -1.936966297  
H -5.128542641 4.6343705746 -1.0809667424  
H -6.8006782189 4.0458209663 -0.9537459292  
H -5.3758233954 3.1889811501 2.3774467541  
H -6.5906591743 4.1709620945 1.5291187984  
H -4.8888536122 4.6415615481 1.4721744204  
H -5.108460475 -0.4413587275 1.7649839795  
H -4.4728464114 -1.4456756193 0.4420874709  
H -6.2150831006 -1.2309805897 0.6160347945  
H -5.4354423188 0.965626397 -2.3077624547  
H -6.4783060962 -0.3352784825 -1.7098990376  
H -4.7426392106 -0.6309771748 -1.9635822169  
C -8.6978582428 2.6484041009 1.3085757843  
C -9.1258767555 3.8444679828 0.722300633  
H -9.2992705599 3.8743733497 -0.3513229009  
C -9.3168064829 4.9894435941 1.4903854621  
H -9.6440535406 5.9112224381 1.0194288737  
C -9.0916486585 4.9472713387 2.8672953565  
H -9.2397126352 5.8370275349 3.471182946  
C -8.6849276239 3.7559329954 3.4637634284  
H -8.5119177383 3.7160152143 4.5347603932  
C -8.4898385568 2.6130934788 2.6878411408  
H -8.1570774351 1.6965395672 3.1643133357  
H -8.3961311311 -0.693887121 0.3833795048  
H -9.4315321055 -0.0043014359 1.6490225513  
H -7.6639810158 0.0221859182 1.8338357909

1,2,4-THAQ Aq-EIB

C -3.9163810767 2.6850663337 0.0131754331  
C -3.8635387161 1.2940776225 0.0280525057  
C -2.646342206 0.6256700096 0.0498798691  
C -1.4675996972 1.3728911369 0.0533661618  
C -1.5216803301 2.7782667516 0.0378603744  
C -2.7517913193 3.4399466965 0.0188043245  
C -0.2755024816 3.5813504635 0.0437470586  
C 1.0095314254 2.8685031329 0.0667699506  
C 1.0609122074 1.4427373753 0.080681228  
C -0.1626540183 0.6536153097 0.0742359248  
C 2.1817560116 3.606781649 0.0735101256  
C 3.4380596157 2.9358631481 0.0942625323  
C 3.4980648075 1.5622875242 0.1074168448  
C 2.3103458875 0.8027340898 0.1007595961  
O -0.3212185462 4.8164182839 0.0294892274  
O -0.1432318314 -0.5843877944 0.0849654505  
C -5.3438357444 3.1721982677 -0.0337865011  
C -5.2494083322 0.7006745786 -0.010437142  
H -2.5756972065 -0.4582306999 0.0626311511  
H -2.760138405 4.5262370833 0.0076570678  
O 2.2499183614 4.9504944735 0.0615183551  
O 4.5629559734 3.6709310653 0.1002687407  
H 4.4559333411 1.0555439614 0.1229373881  
O 2.4385459378 -0.5257586828 0.1141452453  
H 1.3229598657 5.2893925069 0.0462202374  
H 4.3217080532 4.6100587395 0.0900305867  
H 1.5314822101 -0.912539045 0.1074066441  
N -6.1048012894 1.908196491 0.2696569501  
O -7.2811742749 1.8710617079 -0.511868276  
C -8.501588609 1.7739587945 0.2342517654  
C -5.6559634421 3.7616845276 -1.4168998477  
C -5.5928097848 4.2228729749 1.0507280564  
C -5.4260317636 -0.3286717292 1.1088612131  
C -5.5097294924 0.0638110075 -1.3827304494  
C -9.5788118358 1.9659114487 -0.8336727007  
C -8.620906576 2.8103484324 1.3371121451  
C -8.6697520427 0.3685309323 0.8330807497  
H -5.4966407342 3.0299023575 -2.2120283221  
H -4.9956717344 4.6163013748 -1.5940169402  
H -6.6929346966 4.1013789592 -1.4639707812  
H -5.4296413729 3.7920718698 2.0419751027  
H -6.6121921702 4.6086095396 0.9950982842  
H -4.9097702832 5.0678951275 0.9167299569  
H -5.261876835 0.1395590781 2.0822833967  
H -4.7132930426 -1.1508622414 0.9843704001  
H -6.4305217726 -0.7532278364 1.0926337183  
H -5.3541370304 0.7824361214 -2.1911528793  
H -6.5333260396 -0.3094251346 -1.4393602005  
H -4.8112163118 -0.7675015655 -1.5237564518  
O -8.5199103811 -0.5910975977 -0.0927720174  
C -8.7257724903 -1.9415929528 0.3574799242  
C -8.2419008776 -2.8614870309 -0.7417070186  
O -8.9533548063 0.1405384799 1.9845127071  
H -9.444606041 1.2422182309 -1.6396365989

H -9.4989971068 2.9769149372 -1.2415624916  
H -10.5732922389 1.8384776552 -0.3969194417  
H -8.6066616076 3.8090575188 0.8932065149  
H -7.8042458924 2.7100390797 2.0531820012  
H -9.5646043953 2.6723854626 1.8685145474  
H -9.7911323355 -2.0730957588 0.5716796538  
H -8.1783602274 -2.0917992343 1.2926549381  
H -8.7735351257 -2.6638055628 -1.6757521979  
H -8.4138681141 -3.9024970634 -0.4566746034  
H -7.1710810129 -2.7227423824 -0.9147891878

1,2,4-THAQ Aq-EP

C -3.8834624852 2.6237073021 -0.1229801907  
C -3.8009705218 1.2304970461 -0.076769129  
C -2.5703931742 0.5930978207 -0.0041024465  
C -1.4097812205 1.3696559017 0.0224512086  
C -1.4952783709 2.7724968442 -0.0175230318  
C -2.7392117934 3.4058696462 -0.091048349  
C -0.2685499326 3.6046062889 0.0181821405  
C 1.0309661101 2.9227628823 0.0944772384  
C 1.1144570014 1.4989773845 0.1325686782  
C -0.0898132232 0.6816311225 0.0981349518  
C 2.1850217561 3.6883616262 0.1282462383  
C 3.4550693411 3.0473995771 0.2005436896  
C 3.5460170071 1.6759796672 0.2371392159  
C 2.3768706232 0.8887543835 0.2035762564  
O -0.3426932572 4.8378403301 -0.0162477075  
O -0.0427516615 -0.5552499498 0.1292793391  
C -5.3198622663 3.0648230022 -0.252319534  
C -5.1763062419 0.605809769 -0.1195907875  
H -2.4742778046 -0.4882234014 0.0344562348  
H -2.7741093824 4.4913010701 -0.1212019095  
O 2.2227625729 5.0328905638 0.0974576661  
O 4.5619700126 3.8085369161 0.2318176825  
H 4.5141958708 1.1920608731 0.2919099442  
O 2.5350508605 -0.4359312859 0.2420540125  
H 1.2894700909 5.3500536754 0.0468756561  
H 4.3000393235 4.7415393257 0.1977204242  
H 1.6379914022 -0.8441580408 0.2118526758  
N -6.0254310809 1.8090870805 0.143668898  
O -7.2657159138 1.7387795992 -0.5199928996  
C -8.3481567615 1.7684037152 0.3953206334  
C -5.6022232946 3.5208430171 -1.692966663  
C -5.7035727119 4.1745579791 0.7262724561  
C -5.3602258485 -0.405355915 1.0155800142  
C -5.4477181677 -0.0664026759 -1.472393995  
C -9.5424863666 2.3584835357 -0.3447124053  
C -8.7185748789 0.3856972864 0.9195241962  
H -5.3508938828 2.7463392839 -2.420235843  
H -4.9949323963 4.4046924006 -1.9110044567  
H -6.6568918598 3.7784717422 -1.8111381611  
H -5.4892640979 3.8690851013 1.7530358892  
H -6.7739548292 4.3899838902 0.6375286254  
H -5.15826371 5.0973414924 0.5037759446

H -5.1994486653 0.0764412564 1.98274093  
H -4.6529989551 -1.2343751526 0.9076090004  
H -6.3698561454 -0.8222752941 0.9901026437  
H -5.2774656939 0.6154287029 -2.3080925949  
H -6.4832641917 -0.4126749955 -1.5075064236  
H -4.7755779111 -0.9227078487 -1.5874754969  
O -8.5487405349 -0.5734412129 0.0009034601  
C -8.9007634313 -1.9060422422 0.413495806  
C -8.4368794952 -2.8476427965 -0.6757812986  
O -9.1712852388 0.1919237322 2.0226575468  
H -9.7613793339 1.7624165996 -1.234399763  
H -9.3103899769 3.380437321 -0.653932295  
H -10.4214837555 2.3722040677 0.3040364313  
H -9.9832025195 -1.9471895741 0.5682537665  
H -8.4183150714 -2.1138342924 1.3736240824  
H -8.9056300721 -2.5966323865 -1.6304253623  
H -8.7025090813 -3.8756317832 -0.4166214083  
H -7.351393268 -2.7904582293 -0.7960953846  
H -8.0800114955 2.369676255 1.2686139593

1,2,4-THAQ Aq-Me

C -3.9910981372 2.6672089094 -0.042427599  
C -3.9463454041 1.269876264 -0.0619273493  
C -2.734794456 0.5950959016 -0.0391075093  
C -1.5516289013 1.3371551622 0.0018218473  
C -1.5975614208 2.7420536096 0.0215451974  
C -2.8240261909 3.4135275877 0.0003202389  
C -0.346942691 3.5370196454 0.0687396108  
C 0.933759611 2.816483517 0.0938785392  
C 0.9768081274 1.3906318507 0.0735405193  
C -0.2511755727 0.6097512364 0.0273734261  
C 2.1098414568 3.5471637433 0.1381134861  
C 3.3618219416 2.8682212605 0.1634863552  
C 3.4137597317 1.4944016082 0.1443731684  
C 2.2218995938 0.7426372562 0.0991548353  
O -0.3857291255 4.7722537784 0.085871035  
O -0.2391115451 -0.6282121228 0.0087134275  
C -5.4198594564 3.1540900323 -0.0984012893  
C -5.3417273066 0.6962896455 -0.1330631756  
H -2.6702712463 -0.4892139482 -0.0500890197  
H -2.8270261636 4.4997063336 0.0198859194  
O 2.1858928736 4.890369395 0.1602299425  
O 4.4905633794 3.5961750008 0.2064063509  
H 4.3682086115 0.9814078951 0.1639134664  
O 2.3421619209 -0.5865689702 0.0824925754  
H 1.2611769618 5.2350021708 0.1393341352  
H 4.2548174644 4.5367256991 0.2137905145  
H 1.4332029509 -0.9675044955 0.0507991352  
N -6.1315029085 1.8960204019 0.264908643  
O -7.4236797047 1.8625270659 -0.2853664546  
C -8.3894480006 1.8181340713 0.7542496304  
C -5.7563278722 3.6987874421 -1.4956558534  
C -5.7267618956 4.2200494885 0.9545280873  
C -5.5806749903 -0.4165967179 0.8883369491



C -5.6430353154 0.1719231375 -1.5462058961  
H -9.3606074426 1.79207522 0.2555111355  
H -8.3210351101 2.7049396197 1.392481369  
H -8.2621129751 0.9226427885 1.3708791317  
H -5.5124315526 2.9858413469 -2.2847811993  
H -5.1790177132 4.6115512246 -1.6723617907  
H -6.8207041197 3.9355900423 -1.5580559498  
H -5.4970822037 3.8437873652 1.9540958803  
H -6.7872377375 4.4878179541 0.9109471904  
H -5.1453207588 5.1290362352 0.7695154083  
H -5.373623234 -0.0559800582 1.8985546619  
H -4.9443463296 -1.2820044565 0.6775151046  
H -6.6227689856 -0.747565877 0.8361569422  
H -5.4455439534 0.9217099162 -2.3138955383  
H -6.6902132804 -0.1302528911 -1.6167229893  
H -5.0086509239 -0.6964712853 -1.7484422463

#### 1,2,5-THAQ Aq-STY

C -3.8665172543 2.5133432857 0.1479303805  
C -3.802586276 1.1612847259 -0.1188694353  
C -2.5611711652 0.5376077753 -0.3390472901  
C -1.3853019879 1.3135751478 -0.2486269418  
C -1.4850898379 2.6950944581 0.0455800827  
C -2.7153551656 3.3016888233 0.239305995  
C -0.2614353767 3.5301521919 0.1477184187  
C 1.044050782 2.8846229653 -0.0651384826  
C 1.1421697003 1.5064561982 -0.3644139851  
C -0.0776630093 0.6761433274 -0.4705062315  
C 2.2083544295 3.6492716571 0.0292193215  
C 3.4679302966 3.0429618134 -0.1733127212  
C 3.5494518203 1.6908753103 -0.466032834  
C 2.3857781485 0.9233268181 -0.5617297138  
O -0.3375180354 4.7347777215 0.4049241575  
O 0.009185427 -0.5277727403 -0.7409814457  
C -5.2986890702 2.9753425283 0.2620291754  
C -5.1765889113 0.5403047506 -0.1784696032  
O -2.535029206 -0.7654238134 -0.6386764908  
H -2.7533850498 4.3652976274 0.4515928441  
O 2.2356783847 4.9649535555 0.3067700226  
O 4.5832790741 3.7925395114 -0.0791497511  
H 4.5299284482 1.252408742 -0.6166231731  
H 1.302685158 5.2618946564 0.4231751189  
H 4.3293815004 4.7044612992 0.1294819344  
H 2.4348190918 -0.135410332 -0.7905159137  
H -1.5874226102 -1.0215827394 -0.7572063865  
N -6.0425937467 1.6678353481 0.3378902139  
O -7.2276584446 1.7385241787 -0.4283191781  
C -8.4337784347 1.5835687175 0.340008621  
C -5.6611476707 3.8181208334 -0.9692459893  
C -5.5021997385 3.7966662535 1.5384366811  
C -5.2760787287 -0.6669587802 0.7602006227  
C -5.5033946551 0.118453874 -1.6175131429  
H -9.1879361134 1.6293282772 -0.4548654985  
C -8.5272179125 0.229243448 1.0192969945

H -5.5398194321 3.2495501286 -1.8944688777  
H -5.0031921508 4.6920594496 -1.007043531  
H -6.6956108738 4.1602252807 -0.9031405759  
H -5.3285402766 3.1736429706 2.4197744038  
H -6.5132915829 4.2047256479 1.5882270689  
H -4.8007708863 4.6376037992 1.5559253052  
H -5.1276346538 -0.3485831152 1.7960462686  
H -4.5173413873 -1.4076315682 0.4993888386  
H -6.2571405303 -1.137684598 0.6731879676  
H -5.4647021604 0.9692490791 -2.3019884382  
H -6.5033685417 -0.3173486928 -1.6698589155  
H -4.7706758275 -0.6279954027 -1.9356696009  
C -8.6709902186 2.7662988459 1.2592487273  
C -9.0457775367 3.9876429411 0.6888725608  
H -9.1905800983 4.0454392093 -0.3878369935  
C -9.220053555 5.1219973773 1.476480592  
H -9.5055436063 6.0634699911 1.0174358929  
C -9.0324398262 5.0439426701 2.8574344616  
H -9.1677886815 5.9252971512 3.4764869674  
C -8.6794954459 3.8278698017 3.4378332078  
H -8.5358243324 3.7598299277 4.5117649085  
C -8.5002215775 2.6958553604 2.642365286  
H -8.208560144 1.7596393788 3.1071370104  
H -8.4292708171 -0.5639991367 0.2735460471  
H -9.4981270338 0.1255094634 1.5124205394  
H -7.7386326836 0.106976625 1.764274502

1,2,5-THAQ Aq-EIB

C -3.817532214 2.7150045675 -0.1040977822  
C -3.7913737161 1.3369276729 0.0113166825  
C -2.5671657265 0.6534288257 0.0918691864  
C -1.3702794023 1.4035541972 0.0896233328  
C -1.432962469 2.8139895457 -0.0107619553  
C -2.6468870411 3.4761087053 -0.1145683471  
C -0.1864175513 3.6215778512 -0.0129152956  
C 1.1018243212 2.9182407064 0.0943918132  
C 1.1636370755 1.5092003225 0.1910175328  
C -0.0775831842 0.7047658988 0.1845162553  
C 2.2861355276 3.6574428734 0.1008522  
C 3.5296338733 2.9950801613 0.2039479553  
C 3.5753661348 1.6132505645 0.2981732295  
C 2.391661655 0.8709491024 0.2912149943  
O -0.2311799709 4.8515963517 -0.1018008821  
O -0.022643229 -0.5284152297 0.257569376  
C -5.2360322261 3.2036311548 -0.2699871968  
C -5.183719779 0.752747224 -0.0175840671  
O -2.5770969322 -0.6820085454 0.1564301494  
H -2.6550136589 4.5579045807 -0.2010258299  
O 2.3486212983 4.9980103013 0.0136402505  
O 4.6645794046 3.7203616454 0.2094222872  
H 4.5440720032 1.1318191589 0.3761728165  
H 1.4243838654 5.3338210707 -0.0543134906  
H 4.4356478464 4.6593275682 0.1350498899  
H 2.4127817214 -0.2107004365 0.3637243242

H -1.6370825159 -0.98166903 0.210752807  
N -5.9913198549 2.0013846946 0.1921619648  
O -7.2343846449 1.9505526166 -0.4658031101  
C -8.3801017592 1.8431105846 0.3960192431  
C -5.4875305383 3.5851772361 -1.7389456889  
C -5.5497353709 4.4010686096 0.6257536919  
C -5.4346384609 -0.2005015231 1.1549196326  
C -5.4442774564 0.0390598015 -1.3518423839  
C -9.5269946684 2.363627302 -0.4722721757  
C -8.2623870513 2.6217713771 1.69530131  
C -8.6800442522 0.3690524953 0.7158397449  
H -5.2450552805 2.7670839196 -2.4194149591  
H -4.8598541393 4.4437373937 -1.9973844872  
H -6.5355665198 3.8571903283 -1.8817823765  
H -5.4344480758 4.1346740909 1.6792571064  
H -6.5750920221 4.7394934322 0.4527629766  
H -4.8827646558 5.2370949882 0.3924753443  
H -5.2612740363 0.3153591558 2.1030066922  
H -4.7729521763 -1.0667221159 1.0905069761  
H -6.4678174889 -0.556660713 1.1433633182  
H -5.2063516374 0.6762374363 -2.2061299072  
H -6.4943942051 -0.2503393193 -1.4158983487  
H -4.8121952309 -0.8524889548 -1.4003315133  
O -8.5768321554 -0.4143960044 -0.3655668302  
C -8.8631753215 -1.8082155773 -0.156023551  
C -8.6860872737 -2.510792838 -1.4840593365  
O -9.0225343118 -0.0405376713 1.8002326633  
H -9.5521783145 1.824913906 -1.421962897  
H -9.3682535401 3.4276083155 -0.6684701067  
H -10.4841260107 2.2353770291 0.0408869895  
H -8.1431270735 3.6846476213 1.4781455091  
H -7.4123257392 2.2769223941 2.284711618  
H -9.1734734889 2.4766259109 2.2784665088  
H -9.8821273432 -1.9008542544 0.2310039482  
H -8.1795144283 -2.1925707898 0.6081758311  
H -9.3582581482 -2.0902935868 -2.2360164001  
H -8.912201769 -3.5742658133 -1.3717507266  
H -7.6581506663 -2.4123382871 -1.8418465065

1,2,5-THAQ Aq-EP

C -3.8194072663 2.6756315894 -0.1312364927  
C -3.7738147229 1.2929153824 -0.1449970883  
C -2.5397638136 0.6231434756 -0.1159465979  
C -1.3545813544 1.3877752849 -0.0397741895  
C -1.4380133034 2.8004367963 -0.0060033861  
C -2.6611257519 3.451816444 -0.0575121505  
C -0.2036906959 3.6224941998 0.079272653  
C 1.0943731672 2.9308344956 0.1265420653  
C 1.1769150778 1.5199829526 0.0880851026  
C -0.0519840952 0.7018684882 -0.0010027663  
C 2.2674881419 3.6830587738 0.2100477975  
C 3.5204015083 3.0319969524 0.2552680039  
C 3.5864462474 1.6483017407 0.2165623474  
C 2.4140017182 0.8929758013 0.1327893477

O -0.2669039526 4.8544591685 0.1095311969  
O 0.0206709369 -0.5318348804 -0.0419907186  
C -5.2428188889 3.154893784 -0.2727298292  
C -5.1567472801 0.6881126587 -0.2146686217  
O -2.5308767241 -0.712617778 -0.170988939  
H -2.6867172754 4.5367793047 -0.040293721  
O 2.310488121 5.0265092181 0.2523387646  
O 4.6443385044 3.7697208477 0.3356212698  
H 4.5620112079 1.1758049592 0.2525827963  
H 1.3818744147 5.3543751132 0.2125596467  
H 4.4018420194 4.7081039926 0.3508571461  
H 2.4509912006 -0.1902274097 0.1014042778  
H -1.586900276 -1.0028867546 -0.1383999127  
N -5.9880897692 1.9062307635 0.0577858765  
O -7.2057721117 1.8846333461 -0.650577203  
C -8.3182660691 1.9290688661 0.2269592173  
C -5.4731553772 3.6676203041 -1.7038449372  
C -5.61996571 4.2403863919 0.7352970368  
C -5.3889798861 -0.329231666 0.9078267762  
C -5.4227505416 0.041423524 -1.5801793298  
C -9.4731190306 2.5496104641 -0.5498446112  
C -8.7357674847 0.5513756198 0.7286152867  
H -5.2315726936 2.9058457896 -2.4479700384  
H -4.8312890634 4.5363038172 -1.8799344369  
H -6.515368385 3.9651036895 -1.8378576201  
H -5.4410654336 3.8928121537 1.7554689014  
H -6.6814075123 4.4886996235 0.6279970326  
H -5.0447007904 5.1551104773 0.5597457209  
H -5.2045482144 0.1343086 1.8801641795  
H -4.7271942035 -1.189618071 0.7857716728  
H -6.4238183908 -0.6787230053 0.8782999837  
H -5.2490481498 0.7413229859 -2.4006771578  
H -6.459858017 -0.2984891296 -1.6266723846  
H -4.7502162608 -0.812358975 -1.7019414135  
O -8.5619199369 -0.4041221516 -0.192153551  
C -8.9435908799 -1.733588735 0.20339631  
C -8.4528280446 -2.6778777067 -0.871753145  
O -9.2247133743 0.3606592234 1.8169338048  
H -9.672106523 1.965060711 -1.4517573267  
H -9.209565344 3.5690013253 -0.841950436  
H -10.3742693051 2.5762356615 0.0674002421  
H -10.0312582823 -1.7622642639 0.320240313  
H -8.4967123049 -1.949680505 1.1786767046  
H -8.8826001191 -2.4172221864 -1.8421160544  
H -8.7424064393 -3.7028274811 -0.6262127573  
H -7.3630300866 -2.6352980143 -0.9511409443  
H -8.06949313 2.5179639523 1.1143462859

1,2,5-THAQ Aq-Me

C -3.9477766141 2.676788811 -0.0345473361  
C -3.9334055631 1.2924463447 -0.0692024645  
C -2.7167152897 0.593251462 -0.0805845916  
C -1.5117964587 1.3282934749 -0.0241872864  
C -1.5608511679 2.7420888236 0.0282183996

C -2.7691902117 3.4233638818 0.0178667606  
C -0.3053414602 3.5334269846 0.0913909527  
C 0.9769062253 2.8108263561 0.096210218  
C 1.0245140567 1.3990885058 0.0391378018  
C -0.2256200998 0.6112888872 -0.0271866453  
C 2.1696518993 3.5338408769 0.1578114268  
C 3.4071784529 2.8526188465 0.1628169052  
C 3.4389147669 1.4683055153 0.1064838008  
C 2.2467989963 0.7422656651 0.0443860025  
O -0.3377841425 4.7661062277 0.1386892854  
O -0.183313531 -0.623053068 -0.0845387611  
C -5.3664424998 3.1902191379 -0.109709004  
C -5.3328278194 0.7285332057 -0.1372527297  
O -2.7441331284 -0.7416122768 -0.1529250728  
H -2.7675722491 4.5082319041 0.0510738901  
O 2.245919335 4.8753815015 0.2147128407  
O 4.5503274976 3.56251883 0.2226412448  
H 4.4033807203 0.9722982261 0.111824563  
H 1.3244381207 5.2250392836 0.2033599305  
H 4.3306902317 4.506074511 0.2554103189  
H 2.256615561 -0.3410677292 -0.0004128258  
H -1.8083470973 -1.0570400894 -0.1481288671  
N -6.1104227265 1.9487200311 0.2350378334  
O -7.3860475763 1.938782082 -0.3541993035  
C -8.3841301879 1.9229342278 0.6548019359  
C -5.6597426843 3.7419935138 -1.5141535731  
C -5.6687056971 4.2620021506 0.9386059369  
C -5.6072388221 -0.3557450911 0.9080558025  
C -5.6330599218 0.1795900327 -1.5403811307  
H -9.3396079508 1.9117740433 0.1258915531  
H -8.3185729301 2.8141118333 1.287461368  
H -8.2945538793 1.0311848003 1.2830841774  
H -5.4227929855 3.0168596775 -2.2946017208  
H -5.0527983715 4.6367587035 -1.683666319  
H -6.7154719021 4.0092031031 -1.5968820041  
H -5.4637249307 3.8804908257 1.9415874916  
H -6.7230866392 4.5495377276 0.8777711346  
H -5.0673167439 5.1600920485 0.7643933592  
H -5.3746913772 0.0164921396 1.9089295389  
H -5.0130802525 -1.2491804935 0.7060953409  
H -6.6675808541 -0.6259003035 0.8722648702  
H -5.4630727041 0.9266352201 -2.3177850145  
H -6.6737390641 -0.1472359209 -1.5975334355  
H -4.97820033 -0.6753044509 -1.7304265985

1,2,5,8-THAQ Aq-STY

C -3.8354593542 2.5540231864 -0.2412167135  
C -3.7670036861 1.2153987999 0.039418136  
C -2.5257550801 0.5772057829 0.292840675  
C -1.3558749781 1.3399320809 0.2274872505  
C -1.4250347295 2.7384184755 -0.0652332601  
C -2.6659369429 3.3523544519 -0.2882946491  
C -0.20764067 3.5364864587 -0.1194052216  
C 1.0868673456 2.8833252349 0.11110894292

C 1.1645467526 1.5013076319 0.4004952602  
C -0.0659956646 0.6874434667 0.4781812604  
C 2.2644824937 3.634229301 0.0473685858  
C 3.510990567 3.0085871575 0.2676785836  
C 3.5707363656 1.6528546105 0.5497023977  
C 2.3965050866 0.900329215 0.6168780295  
O -0.2472877365 4.7672934205 -0.3601023185  
O 0.0015648868 -0.5198415746 0.7497562437  
C -5.2638048088 3.016694884 -0.409557573  
C -5.1395079802 0.5895494039 0.0952706338  
O -2.5246228138 -0.724929466 0.5963495656  
O -2.8019234701 4.6615326927 -0.5296190106  
O 2.323555053 4.9527739374 -0.2159164647  
O 4.6383867287 3.7430505848 0.2018131798  
H 4.5429083577 1.2012946552 0.7147234079  
H 1.4028995062 5.2737517745 -0.3450329412  
H 4.4024109854 4.6605699927 -0.0028320686  
H 2.4257907513 -0.1606963517 0.8379972054  
H -1.5787550194 -0.9878971883 0.7353704396  
H -1.9036889972 5.0624583689 -0.53209731  
N -6.0125608708 1.7048024497 -0.4266078419  
O -7.1793268255 1.8024252693 0.3633378378  
C -8.4014923897 1.6106780489 -0.3708305357  
C -5.4618059067 3.7477268197 -1.7423001669  
C -5.6487006275 3.9280897134 0.7636735762  
C -5.4613229909 0.1791965587 1.5390181227  
C -5.2279585577 -0.6245833526 -0.8367488296  
H -9.1381463932 1.6962471649 0.4370807865  
C -8.5087706773 0.223718009 -0.9789001568  
H -5.2665209349 3.0650727039 -2.5742309846  
H -4.7839880567 4.6013235036 -1.8071081925  
H -6.4872823645 4.1124204652 -1.8261300684  
H -5.5583004467 3.4054776303 1.7195096664  
H -6.6792732399 4.2693825974 0.6513540097  
H -4.9853046484 4.7969289503 0.7646966001  
H -5.4287767974 1.039656796 2.2120660603  
H -4.7259765796 -0.5606027754 1.865432353  
H -6.4594048448 -0.2601430893 1.5951680364  
H -5.0885040732 -0.3087685429 -1.8746876795  
H -6.2045446203 -1.1029252082 -0.7431344191  
H -4.4622092642 -1.3575671734 -0.5760777007  
C -8.660343268 2.744579095 -1.3443206391  
C -9.020652799 3.9944121904 -0.8293373611  
H -9.1391510296 4.1081444549 0.2461092346  
C -9.2127732862 5.0868851899 -1.6700508173  
H -9.4850590207 6.0516519057 -1.2533676409  
C -9.0594682511 4.9370060054 -3.0491638968  
H -9.2085682632 5.7854916961 -3.7095752705  
C -8.7221927528 3.6916839067 -3.5741859434  
H -8.6048010957 3.5677723134 -4.6463118642  
C -8.5237275493 2.6023008398 -2.7257815186  
H -8.2434439153 1.6432816484 -3.1489946294  
H -8.377239024 -0.5319068132 -0.1997784614  
H -7.7477616591 0.0701069216 -1.74615062

H -9.4960599251 0.0899431198 -1.4305537978

1,2,5,8-THAQ Aq-EIB

C -3.8573543715 2.7347129155 -0.1795450832  
C -3.8240194436 1.3664224937 -0.2155066001  
C -2.5980820255 0.6560854231 -0.1713990145  
C -1.4068300443 1.3840188694 -0.1011747035  
C -1.4390980296 2.8134697519 -0.0575765228  
C -2.6652050644 3.4934465192 -0.0889239849  
C -0.1982395109 3.57219389 0.029174018  
C 1.0804305716 2.8514193272 0.0570822009  
C 1.1217521505 1.4383728916 0.0132602703  
C -0.1311770973 0.6592916975 -0.0595774541  
C 2.2793987087 3.5667487611 0.1297519185  
C 3.5108614269 2.8760981115 0.1562090495  
C 3.5347215108 1.4909809632 0.1120608361  
C 2.3392472952 0.7731291557 0.0413220918  
O -0.2059836497 4.8257287652 0.079418797  
O -0.0955498725 -0.5788339354 -0.0843367145  
C -5.2743345842 3.2593445025 -0.2121495537  
C -5.2119025718 0.7766842789 -0.2400813741  
O -2.6341964839 -0.6802724651 -0.1886291498  
O -2.7666712741 4.8268139746 -0.0250348436  
O 2.3742043161 4.9082876769 0.1786045724  
O 4.6588167659 3.5772596082 0.2253732408  
H 4.4960394238 0.989333629 0.1343169427  
H 1.4620594859 5.2746212816 0.1575528963  
H 4.447449063 4.5229273529 0.2471112275  
H 2.3404331504 -0.3105641988 0.0072344406  
H -1.6951604565 -0.9947805196 -0.1541368266  
H -1.8563037829 5.1955108074 0.0321748392  
N -6.0674408074 1.9982914827 -0.4621248913  
O -7.1913768172 1.9580118563 0.3930524932  
C -8.4545369199 1.9351128962 -0.2811294548  
C -5.4599830519 4.2311717989 -1.3840114405  
C -5.6196333166 3.9436271436 1.1162481212  
C -5.4841953208 0.0690027801 1.0949295394  
C -5.3925388857 -0.1780770968 -1.425043657  
C -9.4613729372 2.0352540526 0.8648705813  
C -8.6753824273 0.5961304061 -1.0021159198  
C -8.6260161045 3.0710412443 -1.2739929279  
H -5.2928170348 3.7095583141 -2.3306671203  
H -4.7556101315 5.0612229367 -1.3000279862  
H -6.4720582122 4.6387321685 -1.3854720025  
H -5.515541299 3.2530989673 1.9569644511  
H -6.649562296 4.3075311325 1.0995297291  
H -4.9449281737 4.7910880677 1.2601187447  
H -5.362818494 0.7597911632 1.9339628538  
H -4.7708655011 -0.7523042143 1.2054289792  
H -6.5017583748 -0.3223358888 1.1144898626  
H -5.1542824115 0.336157855 -2.3600614354  
H -6.4295017146 -0.5129384501 -1.4784282486  
H -4.7440217405 -1.0504108343 -1.3171183754  
O -8.4818134482 -0.4512034909 -0.1869573101

C -8.7119639841 -1.7504741074 -0.7594376335  
C -8.1446618706 -2.7729959752 0.2005146272  
O -9.0310969957 0.4860614215 -2.1509748302  
H -10.4823741772 1.9535963314 0.4818479721  
H -9.3446988854 3.0043960526 1.3570629595  
H -9.2849870778 1.2405064988 1.5920481823  
H -9.6275210253 3.0326512975 -1.7077144487  
H -7.8994506558 2.9898384927 -2.0830882327  
H -8.5004518835 4.0239477431 -0.7521674702  
H -8.2317855703 -1.7955768142 -1.7411685819  
H -9.7893730227 -1.8728228078 -0.9097566114  
H -7.0640643969 -2.6422931785 0.3056571502  
H -8.3360838371 -3.7810262239 -0.1762339437  
H -8.6047668032 -2.6768745501 1.1871607591

1,2,5,8-THAQ Aq-EP

C -3.8597271152 2.7099007539 -0.1708941974  
C -3.8170081166 1.3419899981 -0.2182588977  
C -2.5861511263 0.6399796956 -0.1846684855  
C -1.3997498903 1.3759944738 -0.1168233437  
C -1.4416201041 2.804776635 -0.0625374759  
C -2.672697443 3.476330789 -0.0798603602  
C -0.2053463907 3.5714565157 0.0223065558  
C 1.0784804754 2.8595109069 0.0354095529  
C 1.1290857437 1.4471442677 -0.0193355865  
C -0.1188385641 0.659964019 -0.0884437334  
C 2.2729920877 3.5825255477 0.1048493105  
C 3.5093115821 2.9001220225 0.1168936904  
C 3.5422734574 1.5155463304 0.0620975854  
C 2.3512364922 0.7900797316 -0.0051941727  
O -0.2215926386 4.8243775259 0.0829483246  
O -0.074860179 -0.5777103575 -0.1211942955  
C -5.2810709388 3.2230302759 -0.1795621293  
C -5.2008932935 0.7427145865 -0.2433842815  
O -2.6130097064 -0.6964653146 -0.2085741766  
O -2.7836937322 4.8081495191 -0.0017032101  
O 2.3588950209 4.9242697686 0.1633166829  
O 4.6529186207 3.6085727658 0.1829472785  
H 4.5071031754 1.0203517005 0.0734574388  
H 1.4441634349 5.284433983 0.1517185103  
H 4.4353524254 4.5525796878 0.2138835791  
H 2.3596367258 -0.2933015075 -0.0472832006  
H -1.6715392703 -1.0045840218 -0.1819526319  
H -1.8758616706 5.1832306249 0.0526995307  
N -6.0607922702 1.961708349 -0.4611158864  
O -7.1997948598 1.9051977596 0.3761423725  
C -8.4298063402 1.8614874562 -0.3391433648  
C -5.4939273069 4.2277308869 -1.3173288831  
C -5.6186340825 3.8620461652 1.1737042417  
C -5.4717193301 0.0273304375 1.0875240593  
C -5.3745054004 -0.2092198308 -1.4316570155  
C -8.6418328996 0.5249259079 -1.0537490529  
C -8.6577167855 3.0197082632 -1.288026295  
H -5.3201169355 3.7422882241 -2.2818029018



H -4.8094475454 5.0713108898 -1.2089332684  
H -6.5158747622 4.6099672808 -1.2991916534  
H -5.5030675424 3.1454046703 1.9906878971  
H -6.6498288973 4.2216626523 1.1779335793  
H -4.9460898298 4.7074164645 1.3394332068  
H -5.3547101514 0.7132771285 1.9310180525  
H -4.7554864583 -0.7919184785 1.1947848034  
H -6.4879634241 -0.3680683848 1.1028926672  
H -5.1541037314 0.3137384268 -2.3661036346  
H -6.4046178274 -0.5654696374 -1.4778498526  
H -4.7090016757 -1.0696978106 -1.3329212126  
O -8.4797396504 -0.5112866992 -0.2190296361  
C -8.6916075446 -1.8181474003 -0.7824306371  
C -8.1529094534 -2.8284418186 0.2064024758  
O -8.9621365271 0.4074540745 -2.211745638  
H -9.6600650228 2.9506108509 -1.7160607588  
H -7.9351670595 2.9914201071 -2.1048758606  
H -8.5690122904 3.9624509245 -0.7427692789  
H -8.1820224636 -1.8744620973 -1.7486431747  
H -9.7639556147 -1.9431552749 -0.9633738036  
H -7.075806838 -2.6965220603 0.3411963666  
H -8.3337203584 -3.8411184236 -0.1630149749  
H -8.6415024753 -2.7194905612 1.1777937121  
H -9.1660957073 1.8868606344 0.4737654881

1,2,5,8-THAQ Aq-Me

C -3.9310249706 2.746095665 -0.0424573516  
C -3.916340582 1.373222451 0.0021200179  
C -2.7001545787 0.6508484843 0.0370506155  
C -1.498425765 1.3657669149 -0.0001024132  
C -1.5119590732 2.7956496891 -0.04681338  
C -2.7304737014 3.4909545866 -0.0556581342  
C -0.2595057305 3.5404426421 -0.0716218902  
C 1.0108235033 2.8043510778 -0.0643360215  
C 1.033701847 1.3910183283 -0.0191307459  
C -0.2301106718 0.6268949255 0.024431131  
C 2.2198728521 3.50539629 -0.100183338  
C 3.443148455 2.7999429695 -0.0937148008  
C 3.4490141317 1.4146249888 -0.0497632406  
C 2.2434002969 0.7112482398 -0.0115858151  
O -0.2511925235 4.7942906485 -0.099253253  
O -0.2095083576 -0.6101539251 0.0812467688  
C -5.3446935233 3.2789285646 -0.0009517642  
C -5.3174213765 0.814262753 0.0765114367  
O -2.7569779735 -0.6828077674 0.1142927535  
O -2.8214031841 4.8266487259 -0.0650338561  
O 2.3315167612 4.8459122713 -0.1423505309  
O 4.6010413751 3.4872809783 -0.129774261  
H 4.4043873682 0.9013187046 -0.0453378088  
H 1.4232079711 5.2225213652 -0.1378738945  
H 4.4016996613 4.4354344934 -0.1563347676  
H 2.2306244037 -0.3723184824 0.0245976273  
H -1.8237111388 -1.0121979944 0.1245305548  
H -1.9087141581 5.1908212067 -0.0781787729

N -6.0940804958 2.0271787646 -0.310601005  
O -7.3617759762 2.0329535279 0.2950135145  
C -8.3747523811 1.985598524 -0.6982533732  
C -5.6503903683 4.3075757 -1.0928770402  
C -5.6469491788 3.8819457554 1.3797065048  
C -5.6068662612 0.291602243 1.4923889232  
C -5.5955438554 -0.2880207692 -0.9489993402  
H -9.321918669 1.9935881448 -0.1545116107  
H -8.2966645836 1.0732091483 -1.2978194289  
H -8.3177138709 2.8548822989 -1.3609771078  
H -5.4085769168 3.898108147 -2.0769066579  
H -5.0856246945 5.2279347214 -0.9326525036  
H -6.7187072877 4.544672783 -1.0664652486  
H -5.4554989568 3.1703590175 2.1852168713  
H -6.6947138774 4.1860585245 1.4299451883  
H -5.0117457671 4.7593798673 1.5295844836  
H -5.4338799666 1.0564232381 2.2519759383  
H -4.9508729115 -0.5591017803 1.6962047154  
H -6.6472201834 -0.03361333 1.5610688402  
H -5.3652744693 0.0662938157 -1.9569032505  
H -6.6569090598 -0.5522918267 -0.9057872727  
H -5.0045715867 -1.1800253097 -0.7331260058

1,5-DAAQ Aq-STY

C -5.2706448306 2.5302385779 0.1573922348  
C -5.1927643245 1.1811134643 -0.1072396596  
C -3.9360401944 0.5620253559 -0.3388248052  
C -2.7684995445 1.3752018353 -0.2392723592  
C -2.8959989599 2.7533642869 0.0589383348  
C -4.1341755368 3.3380826501 0.2493705751  
C -1.7006065205 3.6506270673 0.1756769751  
C -0.3668703905 3.0765019065 -0.0290430214  
C -0.2351398737 1.7044635509 -0.3396165619  
C -1.4336806741 0.8089840744 -0.4660095249  
C 0.8005324125 3.8799099532 0.078228991  
C 1.0072789496 1.127225534 -0.5405039364  
C 2.0580610244 3.2654240284 -0.1302492353  
C 2.1543223649 1.9233981719 -0.4317551814  
O -1.8703730697 4.8409954955 0.4395277299  
O -1.2527295789 -0.3739895827 -0.7578790535  
C -6.701360299 2.991924252 0.2764739144  
C -6.5755647901 0.5554559976 -0.1368008141  
N -3.8467314109 -0.7615131409 -0.6345095167  
H -4.1891329153 4.3999203391 0.4621652489  
N 0.7505843338 5.2039420481 0.3711265799  
H 2.9537832025 3.8752578987 -0.0485544978  
H 3.1341731655 1.4819496751 -0.5861416919  
H -0.1460266079 5.6451366954 0.5183434405  
H 1.6034359696 5.7324660947 0.4378665411  
H 1.0655654588 0.0719592747 -0.7771147731  
H -4.6738556675 -1.2865932301 -0.8519154263  
H -2.9349319884 -1.1375348509 -0.8604035452  
N -7.4428787998 1.6868998342 0.3711414909  
O -8.6356078565 1.7458042082 -0.3858364937

C -9.837939124 1.6082705052 0.391067565  
C -7.0724233037 3.8215182533 -0.9610161458  
C -6.9011473589 3.8262461552 1.5449137565  
C -6.69026474 -0.6152043575 0.8506363094  
C -6.9586484783 0.1149721137 -1.5582708734  
H -10.59492281 1.639080644 -0.401973052  
C -9.9347314321 0.2683526815 1.0984696414  
H -6.9526826222 3.2446081782 -1.8814726056  
H -6.4139762419 4.6941630139 -1.0104203395  
H -8.1067740739 4.1644299952 -0.8949436541  
H -6.7232480774 3.2122488301 2.4318245433  
H -7.9116393485 4.2358631234 1.5945552405  
H -6.1986556286 4.6657943825 1.5513946397  
H -6.5527245054 -0.2451095761 1.8699082699  
H -5.9402151517 -1.3886321775 0.6705996151  
H -7.6731414064 -1.0836971482 0.7743305929  
H -6.9417344844 0.9607549723 -2.2488412083  
H -7.961491861 -0.3165983794 -1.5701938967  
H -6.25685177 -0.6366176053 -1.9313631698  
C -10.0733921067 2.8087771313 1.2874417004  
C -10.4458410389 4.0192291204 0.6930337866  
H -10.5873701762 4.0568541283 -0.3849668627  
C -10.6206595507 5.1684684656 1.4584752964  
H -10.9032648539 6.1014588449 0.9807588719  
C -10.4363794589 5.1165142673 2.841057402  
H -10.5715269152 6.0097743805 3.4428326572  
C -10.0860118036 3.911480145 3.4453778877  
H -9.9441112531 3.8638580193 4.520620764  
C -9.9060245681 2.7644285343 2.6720110254  
H -9.6158150362 1.8373801454 3.1556764714  
H -9.8388525752 -0.5412513188 0.3700030453  
H -10.906684178 0.1776032229 1.5920440234  
H -9.1484571148 0.160139843 1.8479467441

1,5-DAAQ Aq-EIB

C -5.3653065436 2.6607838579 0.3313819712  
C -5.3428924092 1.2984669486 0.1315479226  
C -4.1154493712 0.6254482954 -0.1061819477  
C -2.9191127851 1.4027755652 -0.0847260785  
C -2.9906427506 2.7971077798 0.1488418542  
C -4.2018109276 3.4333952613 0.3489332312  
C -1.7628585308 3.6571612027 0.182966368  
C -0.4565434798 3.0276722285 -0.0325988021  
C -0.3803512416 1.6378500702 -0.2760507861  
C -1.6112866986 0.7795050746 -0.3205561814  
C 0.7396821056 3.7944229049 -0.0015854858  
C 0.8352415862 1.0084711491 -0.4838588393  
C 1.968952068 3.126859165 -0.2157166842  
C 2.0110144674 1.7688994868 -0.4504380759  
O -1.8854055728 4.864295215 0.3910027017  
O -1.479594245 -0.4224716595 -0.5551070004  
C -6.7741676811 3.1767305429 0.4703858631  
C -6.7456863036 0.7188457686 0.1877005276  
N -4.0794873955 -0.7119930698 -0.3386673491

H -4.2161039121 4.505442939 0.5117867647  
N 0.7430398935 5.1324934495 0.2234129739  
H 2.8865491158 3.7085019291 -0.1923973259  
H 2.9702789367 1.2863643068 -0.6110795693  
H -0.1327338592 5.6109553933 0.3792245442  
H 1.6152419588 5.6325269504 0.2440552255  
H 0.8511966781 -0.0587533139 -0.6675223455  
H -4.9299480941 -1.2274738598 -0.4718194762  
H -3.1874175518 -1.1356835366 -0.5583399528  
N -7.5547658473 1.908459864 0.6550534443  
O -8.7703580145 1.9733188603 -0.0643283619  
C -9.9558862795 1.9250156508 0.738466993  
C -7.1558771062 3.9568364374 -0.7958561546  
C -6.9136437038 4.0541797019 1.7170133906  
C -6.8593854221 -0.3809586323 1.2530843571  
C -7.2022292748 0.2066011117 -1.1865671425  
C -11.0735439401 1.8219686924 -0.3000148924  
C -10.1507354821 3.2339845185 1.5203915892  
C -9.9872271573 0.7552555062 1.7057236611  
H -7.0370352806 3.3380108226 -1.6892571565  
H -6.4928273102 4.8229802601 -0.8888728267  
H -8.1910491364 4.2961437303 -0.7401634213  
H -6.6366036323 3.4878163312 2.6095433444  
H -7.9400616495 4.4047120195 1.8340163712  
H -6.2651243925 4.932959919 1.639251389  
H -6.6319928582 0.0383821697 2.2364096994  
H -6.170168897 -1.2090273955 1.072539938  
H -7.8704911021 -0.7903784538 1.2721624407  
H -7.1952027963 1.0095015077 -1.9268322533  
H -8.2157146616 -0.1967742347 -1.1285581392  
H -6.5372700647 -0.5852630385 -1.5428136258  
O -10.0868587959 4.3097694563 0.7217097061  
C -10.3135914447 5.5816020859 1.3537015961  
C -9.9023572872 6.6539984593 0.3689909638  
O -10.3861203051 3.299064862 2.7031736815  
H -10.9763176772 0.8732968369 -0.8344736667  
H -11.0016579232 2.6445471818 -1.0138650729  
H -12.0510972118 1.8535605033 0.1892826588  
H -9.9273868681 -0.1785072114 1.1400345801  
H -10.923403501 0.7695251347 2.2675800809  
H -9.160222838 0.8163015968 2.4140519866  
H -9.7327192067 5.626730758 2.2794727348  
H -11.3728507189 5.6471404152 1.6221620038  
H -8.8352436789 6.577990756 0.1425702338  
H -10.0963031999 7.6419751035 0.7943827919  
H -10.4632827908 6.560308668 -0.5642009702

1,5-DAAQ Aq-EP

C -5.3483023146 2.6468071293 0.3613422094  
C -5.3249179849 1.2842432039 0.161364517  
C -4.0983061265 0.6124108457 -0.0818483984  
C -2.9025392998 1.3905942579 -0.063679449  
C -2.9744205021 2.7847860576 0.169867929  
C -4.1854604942 3.4203536911 0.3741218376

C -1.7469406101 3.6456330515 0.199782493  
C -0.4409141417 3.0167914582 -0.0197067153  
C -0.3646715158 1.6269678704 -0.2630331298  
C -1.5951763328 0.7679639483 -0.3036916499  
C 0.7550169367 3.784222422 0.0070176025  
C 0.850551785 0.9981577205 -0.4745920642  
C 1.9839455674 3.117234486 -0.2110603953  
C 2.0259906622 1.7591920102 -0.4453387119  
O -1.8695987641 4.8527287235 0.4078768711  
O -1.4639363468 -0.433929027 -0.5387423295  
C -6.7580116918 3.160049739 0.5064220735  
C -6.7276512806 0.705046155 0.2128686808  
N -4.0632627189 -0.7242976209 -0.3174623291  
H -4.1996104383 4.492434075 0.5365148059  
N 0.758249865 5.1223213108 0.2315896892  
H 2.9012630701 3.6994306021 -0.1910871205  
H 2.9849626763 1.2771186753 -0.6090561676  
H -0.1174206555 5.6003352132 0.3893006742  
H 1.6300289174 5.6232276451 0.2482388055  
H 0.8664024846 -0.0691197606 -0.6579629328  
H -4.9143529784 -1.239796955 -0.4459818547  
H -3.1717920865 -1.1485231756 -0.5383275322  
N -7.5280341371 1.8878702802 0.7063501751  
O -8.764699289 1.9439399043 0.0190443879  
C -9.9039942527 1.917225439 0.873163055  
C -7.155347833 3.9309571887 -0.7604721793  
C -6.891018607 4.0467168118 1.7470428832  
C -6.8517653826 -0.4139997905 1.2554500824  
C -7.1865302594 0.2205656 -1.1711829933  
C -10.1010630881 3.2354980249 1.625475401  
C -9.9713931419 0.740012 1.8236530258  
H -7.0331694988 3.3127498542 -1.6535998087  
H -6.5043629795 4.8056014901 -0.8588411204  
H -8.1946609427 4.2568984874 -0.6996653372  
H -6.6263537196 3.4824955921 2.644549502  
H -7.9119284967 4.4152655853 1.8570109093  
H -6.2298025907 4.9155294931 1.6659347204  
H -6.5871657822 -0.0276411439 2.242936659  
H -6.200655042 -1.2639204495 1.0386504225  
H -7.8769647136 -0.7858695253 1.2874059186  
H -7.1874692749 1.0391590759 -1.8938607759  
H -8.1962082276 -0.1922064908 -1.1190114459  
H -6.515081952 -0.5570817376 -1.5465135597  
O -10.0928713572 4.2842232918 0.7904543772  
C -10.3180728452 5.5720847775 1.3906107876  
C -9.987961455 6.6185376683 0.3492511191  
O -10.2918635331 3.3287887109 2.8139131553  
H -9.9520461068 -0.1924251537 1.2548588557  
H -10.900979304 0.7859584386 2.3947563401  
H -9.1364252461 0.7663621996 2.5254224351  
H -9.6894800411 5.6633115011 2.2812556879  
H -11.3625966356 5.6216527751 1.7142702411  
H -8.9331851952 6.5597642394 0.0671657025  
H -10.1835930182 7.6159754373 0.7510824505

H -10.5961608311 6.4785845099 -0.5477088242  
H -10.7274209017 1.8654021621 0.1499003419

1,5-DAAQ Aq-Me

C -5.3624272872 2.6501966506 -0.000274783  
C -5.3162390225 1.2706909656 -0.0583388443  
C -4.0752941583 0.5898353763 -0.0912792615  
C -2.8872436848 1.3768525839 -0.0300002351  
C -2.9816309344 2.7874083858 0.0396576964  
C -4.2069526221 3.4313378794 0.0506372466  
C -1.7613562344 3.6562226583 0.104244492  
C -0.4412242551 3.0176570894 0.1077380019  
C -0.3429730314 1.6093616996 0.0437959031  
C -1.5647800465 0.7406231739 -0.0313925356  
C 0.7472534793 3.7941907063 0.1751011818  
C 0.8856728749 0.9713851734 0.0460672251  
C 1.9903447067 3.1176440802 0.1766237549  
C 2.0533347575 1.7417770362 0.113767387  
O -1.900781893 4.8783331165 0.1542226627  
O -1.4163998912 -0.4803890606 -0.0899618049  
C -6.7871700214 3.1467486251 -0.045624611  
C -6.7179792551 0.6920822686 -0.1448594909  
N -4.0313689475 -0.7625209404 -0.2025344189  
H -4.2361713467 4.5144112137 0.0986612589  
N 0.7306623293 5.1495386348 0.2374569606  
H 2.9019115935 3.7068994782 0.2284265155  
H 3.0228162895 1.2529997364 0.1165759668  
H -0.1553331464 5.6346559103 0.2358915756  
H 1.5973206387 5.6572272427 0.2856338225  
H 0.9173855919 -0.1100422605 -0.0049592153  
H -4.8773424005 -1.2980797746 -0.1326968531  
H -3.1309090413 -1.2204897617 -0.1578486159  
N -7.5104938647 1.8861963447 0.2703522316  
O -8.7899544251 1.8543409041 -0.3136493314  
C -9.7878891363 1.9172791692 0.69293423  
C -7.1084008126 3.7414908573 -1.4254297531  
C -7.0819269402 4.1833225457 1.0408170001  
C -7.0404363082 -0.4151625573 0.8685782888  
C -7.0287091247 0.1956026184 -1.5673269325  
H -10.7426953997 1.8419018546 0.1680075265  
H -9.741269477 2.8640649338 1.2405298126  
H -9.6838947073 1.0905877171 1.4027935933  
H -6.857754452 3.0549827156 -2.2358053471  
H -6.5245760452 4.656413371 -1.5644663114  
H -8.1711180592 3.9860172257 -1.4912500347  
H -6.8846029498 3.7618564342 2.0292394959  
H -8.1301218272 4.4941486582 0.9891078222  
H -6.4632391353 5.0754302654 0.9020645421  
H -6.6629339527 -0.1566575504 1.8606763225  
H -6.6505722601 -1.3951831126 0.5758247948  
H -8.128034651 -0.5206750008 0.9228446634  
H -6.9133300852 0.9902939386 -2.3053704343  
H -8.0532010511 -0.1799011083 -1.6203456427  
H -6.3412903767 -0.6127381116 -1.8356675186

1,4-DAAQ Aq-STY

C -5.2134444077 2.5625617912 0.1327482804  
C -5.1128177705 1.1913807103 -0.0891307953  
C -3.875560795 0.584012279 -0.240447293  
C -2.7232157233 1.372510088 -0.1683244918  
C -2.8234214916 2.7518593958 0.0541722794  
C -4.0764073734 3.3532724408 0.2074054858  
C -1.6053173837 3.6038927304 0.1345040893  
C -0.291450049 2.9670597791 -0.0218776845  
C -0.1889640748 1.5485444439 -0.2494684814  
C -1.396610652 0.7174942143 -0.3300020424  
C 0.8670405209 3.7600983828 0.0542798531  
C 1.0705660604 0.9414109319 -0.3972276594  
C 2.1278927876 3.1142779432 -0.0989649621  
C 2.2248157076 1.772626283 -0.313751875  
O -1.7375959464 4.8156572041 0.3298146956  
O -1.3535398428 -0.5008388289 -0.525682127  
C -6.6572253178 2.9906667787 0.2389973012  
C -6.4793343103 0.5563132975 -0.1631881444  
H -3.7635842546 -0.4821015394 -0.4152318771  
H -4.1193848924 4.424830109 0.3791143982  
N 0.8592423688 5.1045185995 0.2636144407  
N 1.2556636953 -0.3888763615 -0.6151999367  
H 3.030420769 3.7173729666 -0.0416991423  
H 3.2039821074 1.3142416175 -0.4261417373  
H -0.0246453179 5.5794784195 0.3797685783  
H 1.7291936578 5.6056422245 0.3143318898  
H 0.4493942505 -0.9944265406 -0.6762729847  
H 2.1879726396 -0.7534531888 -0.7067514979  
N -7.3618772218 1.660673365 0.3625660508  
O -8.5706407232 1.6790115123 -0.3711272329  
C -9.7493316434 1.5040390559 0.4328497946  
C -7.0636631402 3.787448506 -1.0083860428  
C -6.8741519841 3.8422871208 1.4930844966  
C -6.5543176492 -0.6741011124 0.7442189462  
C -6.7918458336 0.1531682685 -1.6118054697  
H -10.5265554888 1.5084941139 -0.3409030568  
C -9.7817377264 0.1622405401 1.1429094209  
H -6.9305636496 3.2039424522 -1.9222839072  
H -6.4358268744 4.6816063306 -1.0733226653  
H -8.1091172995 4.0953380953 -0.9402492473  
H -6.6780896137 3.2489423229 2.3899786191  
H -7.8932948113 4.2306088904 1.5404705659  
H -6.1896316343 4.6970501458 1.4796503835  
H -6.4116164873 -0.3830552196 1.7884326127  
H -5.7717366904 -1.3885158299 0.4692357877  
H -7.5156749896 -1.1811898714 0.6418684128  
H -6.7461426917 1.0110290068 -2.2863597198  
H -7.7878475067 -0.2890400632 -1.6832128116  
H -6.0516069963 -0.5836296956 -1.9390138084  
C -10.0007284104 2.6982608355 1.3329477741  
C -10.4349964704 3.8924320042 0.7476535497  
H -10.6107427855 3.9212495143 -0.3256053298

C -10.6277346614 5.0371349881 1.5156994077  
H -10.9591068008 5.9576406276 1.0450568109  
C -10.3975195366 4.9967497764 2.8917449057  
H -10.5462396939 5.8864389401 3.4956425958  
C -9.9832914922 3.8074820257 3.4872254528  
H -9.8046798081 3.7692857819 4.5574034898  
C -9.7866930848 2.665012062 2.7113215632  
H -9.4471132329 1.7503720099 3.1866238044  
H -9.694733192 -0.6437209259 0.4095639203  
H -10.7290065196 0.0451963023 1.6773116467  
H -8.9604686177 0.0746819521 1.8571207203

1,4-DAAQ Aq-EIB

C -5.3583981185 2.691172838 0.5007119759  
C -5.3294902702 1.3315783563 0.1983900362  
C -4.1285685435 0.6851216661 -0.0506867657  
C -2.9414221814 1.4221414324 0.0047316239  
C -2.9704971217 2.7887312495 0.3098534972  
C -4.1872045645 3.4305060476 0.5616008594  
C -1.7143293455 3.5853851337 0.3738618164  
C -0.4384913491 2.9073205877 0.1106880388  
C -0.4087164639 1.5017552107 -0.2022826915  
C -1.6535798677 0.7252967664 -0.2639919885  
C 0.7560376694 3.6452310243 0.180588426  
C 0.8152684689 0.8525957854 -0.4409867296  
C 1.9798422783 2.9560762432 -0.0577939655  
C 2.0080832847 1.6266213868 -0.353610863  
O -1.7850421636 4.786634724 0.6485451627  
O -1.6730903913 -0.4806574971 -0.5263047554  
C -6.7751148147 3.1698313028 0.7002936999  
C -6.7242486847 0.7553774018 0.1680347884  
H -4.0711427641 -0.3728889068 -0.2895051785  
H -4.1762968771 4.4911325299 0.7953513929  
N 0.8159149701 4.9808086373 0.441510391  
N 0.9315042626 -0.4640326575 -0.7696803566  
H 2.9097082542 3.5165380147 -0.0055170075  
H 2.9602896232 1.1348974706 -0.5353036517  
H -0.0348501179 5.4663911117 0.6889444326  
H 1.7122306797 5.4109370483 0.5935509612  
H 0.1031547227 -1.0424898344 -0.7626667091  
H 1.8458833685 -0.880848613 -0.8100186713  
N -7.5243745207 1.8667867256 0.7959229934  
O -8.7762708225 1.9671962697 0.1467769938  
C -9.9156400888 1.8168494239 1.0019438608  
C -7.2075840231 4.0453456605 -0.4840247182  
C -6.9053070645 3.9379647403 2.0179729026  
C -6.8057524241 -0.5126495604 1.0207703878  
C -7.1369018389 0.4407826655 -1.2771127485  
C -11.0839515452 1.747365846 0.017647223  
C -10.1122982028 3.0608748038 1.8829621716  
C -9.8558968539 0.5803858091 1.88106092  
H -7.0849357312 3.5183555238 -1.4334265415  
H -6.5780756379 4.9410148392 -0.5066909801  
H -8.2532241078 4.3390418804 -0.3795475432



H -6.6222425633 3.2979369907 2.8570278675  
H -7.9292393985 4.2813512304 2.1719816039  
H -6.2545984598 4.8189035273 2.0078638922  
H -6.5730116993 -0.2840608886 2.064048454  
H -6.0884009332 -1.2542111385 0.6548459058  
H -7.8008228864 -0.9583603783 0.9678698824  
H -7.0983586135 1.3306424237 -1.9093820181  
H -8.1520407854 0.0384311143 -1.308906475  
H -6.447321755 -0.3043528621 -1.6856302676  
O -10.1139889639 4.1912032057 1.1596669611  
C -10.3528430972 5.4072617869 1.8884332012  
C -10.0318022691 6.5585324397 0.9608415348  
O -10.2978859339 3.0378944991 3.0761899545  
H -10.982351595 0.8447387132 -0.5904884022  
H -11.079383821 2.6220157774 -0.6353454832  
H -12.0340973067 1.7052918379 0.5576641749  
H -9.8284682108 -0.3090046739 1.2464700787  
H -10.7446408896 0.5376438379 2.5138091314  
H -8.97468183 0.604690555 2.5233783052  
H -9.7264654167 5.4130136814 2.7853142101  
H -11.3981928459 5.4134634282 2.2134413873  
H -8.9764935052 6.537718208 0.6751069312  
H -10.2359311972 7.5077105369 1.4629170516  
H -10.6385271051 6.5067670592 0.0533994282

1,4-DAAQ Aq-EP

C -5.3444694262 2.6777888753 0.5024323545  
C -5.3109998185 1.3142191529 0.2180431825  
C -4.1092670302 0.6699621526 -0.0318212618  
C -2.9253454595 1.4132542421 0.0044452857  
C -2.9585876439 2.7837263615 0.2907309131  
C -4.1763511208 3.4233323513 0.5434850964  
C -1.7055127853 3.5867670257 0.3343892963  
C -0.4285624992 2.9105561868 0.0720524261  
C -0.3947344418 1.5009078577 -0.2217358271  
C -1.6364095075 0.7184778251 -0.2643844752  
C 0.7632318294 3.6543742942 0.1236292884  
C 0.8303266646 0.8536033282 -0.4598217384  
C 1.9884039032 2.9670556753 -0.1136618928  
C 2.0204031806 1.6338112389 -0.391301336  
O -1.7797300016 4.791514325 0.5923830379  
O -1.6526385868 -0.4909457619 -0.5105678971  
C -6.7622189658 3.1511937581 0.709955038  
C -6.7032469746 0.7318991816 0.2033815136  
H -4.0487732931 -0.3909061256 -0.2567573008  
H -4.1681466745 4.4870578503 0.7628004461  
N 0.8190201779 4.993379713 0.3665244328  
N 0.9496148074 -0.4670217798 -0.7703762162  
H 2.9161798894 3.532066215 -0.0752268876  
H 2.9734883066 1.1436257594 -0.5725005402  
H -0.0324424869 5.4794587611 0.6105582529  
H 1.7144041688 5.4307078499 0.5024926336  
H 0.1232858242 -1.0482240826 -0.7513737303  
H 1.8653332283 -0.8805106637 -0.8139317245

N -7.4999133505 1.8437059237 0.8329422743  
O -8.7659395016 1.926235881 0.2049271193  
C -9.8617474804 1.7875535463 1.1034392699  
C -7.2167790396 4.007355598 -0.4799918325  
C -6.8826171368 3.9385929695 2.0171215346  
C -6.7769396662 -0.5312992532 1.0630959185  
C -7.1263423595 0.4093812236 -1.2372103951  
C -10.0631527709 3.033716806 1.9685530817  
C -9.840496368 0.533674272 1.9528468218  
H -7.1003776784 3.471168673 -1.4248676749  
H -6.5972132368 4.9092442427 -0.520424766  
H -8.2642697986 4.2914215608 -0.3660369518  
H -6.6034502185 3.308410803 2.864804728  
H -7.9027030381 4.2949298374 2.1678387581  
H -6.2243645523 4.8134801048 1.9922636335  
H -6.5321534113 -0.2979834108 2.1025583894  
H -6.0658596961 -1.2766775693 0.692755625  
H -7.7739889407 -0.9742805009 1.0231245349  
H -7.0943819645 1.296054413 -1.8741694539  
H -8.1400421526 0.0036100751 -1.259866402  
H -6.437342397 -0.335414193 -1.6472855841  
O -10.1215696033 4.1453241498 1.2204479216  
C -10.3598484953 5.3730973779 1.9301847318  
C -10.1068839398 6.5083741274 0.9628178595  
O -10.2045638288 3.0274628808 3.1675010856  
H -9.83712562 -0.3464516645 1.3062654983  
H -10.7302971492 0.5054835393 2.5850889284  
H -8.9598542616 0.5236917536 2.5969017387  
H -9.6965150074 5.4155909395 2.7991338853  
H -11.390392249 5.3622214683 2.2992123382  
H -9.0647853848 6.5045484294 0.6316133176  
H -10.3115890457 7.4646368645 1.4510074124  
H -10.7508979076 6.4202171688 0.0844699238  
H -10.7180280131 1.7647403949 0.4177743601

1,4-DAAQ Aq-Me

C -5.2869219262 2.7211311169 -0.0276726587  
C -5.2390367237 1.323284584 -0.0657508089  
C -4.0265015252 0.6549498826 -0.0566484192  
C -2.844260883 1.4034074611 -0.0108500017  
C -2.8921698608 2.8020474669 0.0271981741  
C -4.1228998142 3.4693084212 0.0199601289  
C -1.6423464916 3.6092350086 0.0801841748  
C -0.3532511474 2.9073887335 0.0942475196  
C -0.3039547566 1.4684248298 0.0549517378  
C -1.5420794424 0.6818775349 0.0005983597  
C 0.8343280714 3.6580854668 0.1473447921  
C 0.932288282 0.7989317227 0.0691632515  
C 2.0706685134 2.9494256264 0.1610349261  
C 2.1172903389 1.5886856567 0.1237920285  
O -1.7299035304 4.8403781278 0.1110583151  
O -1.5452178895 -0.552228028 -0.0354772206  
C -6.7178924418 3.2038490078 -0.071431653  
C -6.6337202259 0.7469736475 -0.1386021547

H -3.9555184598 -0.4285752552 -0.0818775344  
H -4.1261755971 4.5549181932 0.0537954855  
N 0.8769870165 5.0172808697 0.1861521503  
N 1.0679153513 -0.5542313167 0.0331192374  
H 2.9952825495 3.5193943075 0.2022956664  
H 3.0788002861 1.0818918962 0.1354802135  
H 0.0111331567 5.5374135826 0.1784857196  
H 1.7649427878 5.48683547 0.2261945735  
H 0.2396049143 -1.1312251967 -0.0026684163  
H 1.9858930408 -0.9635045855 0.0522182733  
N -7.4254832366 1.9392513774 0.2778610566  
O -8.7207769888 1.9097584526 -0.2680737951  
C -9.6803509774 1.8487618897 0.7751116013  
C -7.0632975486 3.7661383563 -1.4594048877  
C -7.0247715064 4.2547450166 0.9965352706  
C -6.8662325336 -0.3792933646 0.8696142682  
C -6.9421840434 0.2391904303 -1.5560124638  
H -10.6547333487 1.828293716 0.2819033609  
H -9.6100613926 2.7262695645 1.4261426955  
H -9.5484885873 0.9447305368 1.3785468882  
H -6.8223833676 3.0631248562 -2.2583600828  
H -6.4858435537 4.6804847345 -1.6271906218  
H -8.1280978268 4.0038102736 -1.5141800238  
H -6.7897665798 3.8651928616 1.9897790842  
H -8.0862135551 4.5209022095 0.9607478556  
H -6.4446675235 5.1666008335 0.821984401  
H -6.6567265118 -0.0295577414 1.8831772955  
H -6.2254575942 -1.2384511176 0.6466249278  
H -7.9070587366 -0.7150216577 0.8171263353  
H -6.7510370562 0.9996756641 -2.3147797198  
H -7.9883807198 -0.0671683446 -1.6259621721  
H -6.3039804048 -0.6230927797 -1.7723271342

1,4,5-TAAQ Aq-STY

C -5.2116791431 2.5782700115 0.1665785838  
C -5.1579402621 1.2247409177 -0.0905762366  
C -3.9161031642 0.5776937765 -0.3144947616  
C -2.7285947381 1.3661375326 -0.2185477917  
C -2.8340500695 2.7446875148 0.0715223211  
C -4.0609713559 3.3595431708 0.2565924346  
C -1.6230591078 3.6100761508 0.1870455433  
C -0.3023238954 3.0109344855 -0.0113600459  
C -0.1916987889 1.6145566297 -0.327706289  
C -1.398823152 0.7736153902 -0.4429900489  
C 0.8447373676 3.8144549417 0.1223011021  
C 1.0764597548 1.0339651703 -0.5113272915  
C 2.1120405177 3.1935641478 -0.052675063  
C 2.2187040217 1.8691655818 -0.3556806037  
O -1.7713590717 4.806496472 0.4516848524  
O -1.2856231124 -0.4341905372 -0.7267657756  
C -6.6334136692 3.0676303396 0.2820098687  
C -6.5539914675 0.6267756427 -0.1167792286  
N -3.867395521 -0.7565491694 -0.5909428153  
H -4.0896916107 4.4233906436 0.4637062423

N 0.8153351863 5.1497308124 0.3896845629  
H 3.0088756785 3.7987874746 0.0510479204  
H 3.2023331986 1.427385849 -0.4937916928  
H -0.0743794634 5.5862087603 0.5865556194  
H 1.6770471152 5.6295991816 0.585879712  
N 1.299902473 -0.2691340316 -0.8608777358  
H -4.7070871591 -1.2325590562 -0.8670114679  
H -2.96880941 -1.1448095065 -0.8447649123  
H 0.5158548595 -0.9045673142 -0.8524340628  
H 2.2345954015 -0.630754353 -0.7693482351  
N -7.397913404 1.7772224082 0.3892967967  
O -8.5940649253 1.853332812 -0.3615076011  
C -9.7941376596 1.7430887208 0.4224113888  
C -6.9912847829 3.8933358727 -0.9620029102  
C -6.8164132604 3.9171709111 1.5428308453  
C -6.6920890439 -0.5388973461 0.8735411701  
C -6.9511529863 0.1917006087 -1.5363259671  
H -10.5549921473 1.7810030049 -0.3666936502  
C -9.9113595513 0.410844009 1.1412600868  
H -6.8830923718 3.3069062644 -1.8778420005  
H -6.3163836645 4.7527828568 -1.019373208  
H -8.0191085123 4.2560986232 -0.8979182191  
H -6.6508913321 3.3073691094 2.4350224865  
H -7.8179950507 4.348661401 1.5889458543  
H -6.0961389832 4.7414962676 1.541593799  
H -6.5509520208 -0.1672520134 1.8917983097  
H -5.953820908 -1.3241164355 0.6976757171  
H -7.6830222769 -0.9902129116 0.7963284318  
H -6.914713928 1.0346587031 -2.2295681403  
H -7.9643990874 -0.2150030229 -1.5446578569  
H -6.2704405944 -0.5786888411 -1.9100802127  
C -10.0042648974 2.9546791619 1.3102825864  
C -10.3579695644 4.1667432509 0.7077474637  
H -10.5026274029 4.1982832454 -0.3700285074  
C -10.5095910667 5.3248529807 1.4646641707  
H -10.7775257192 6.2589491077 0.9806455277  
C -10.3202214449 5.2806944471 2.8468293651  
H -10.4369769615 6.1809451762 3.4420253087  
C -9.9879919209 4.0745896277 3.4592551237  
H -9.8417093214 4.0331741306 4.5341854194  
C -9.8314874191 2.9184492366 2.6943895654  
H -9.5549203091 1.9903151555 3.1839979312  
H -9.8364981882 -0.4060122388 0.4184878918  
H -10.8811824897 0.3427831133 1.6427172283  
H -9.1211982159 0.2931159736 1.8852111007

1,4,5-TAAQ Aq-EIB

C -5.368858286 2.7474772983 -0.1377753882  
C -5.3714159791 1.3915312135 0.1213313442  
C -4.1559446057 0.6776320851 0.255757336  
C -2.9367896467 1.4137477318 0.144121641  
C -2.985814586 2.8016844699 -0.1141474846  
C -4.1875524451 3.4759229568 -0.2592629806  
C -1.7385943206 3.6110359541 -0.2484232721

C -0.4430534015 2.9488991639 -0.0860123126  
C -0.3902546154 1.5444251821 0.209275431  
C -1.6313441283 0.7527394303 0.3118195116  
C 0.7365653471 3.7052407599 -0.2105289862  
C 0.8522291058 0.9098790197 0.3885363608  
C 1.9763650024 3.0332794989 -0.0277767841  
C 2.0278537923 1.7025021023 0.2613201626  
O -1.8374813538 4.8174467596 -0.4901254397  
O -1.5697203441 -0.4694160817 0.5431658464  
C -6.7703290101 3.2804466167 -0.2964766541  
C -6.7908463965 0.8528147386 0.1464420721  
N -4.1729187995 -0.6705104549 0.445823571  
H -4.1736849356 4.54077847 -0.463779604  
N 0.7652108961 5.0322857403 -0.519079529  
H 2.8975260324 3.602227649 -0.1232441482  
H 2.9918362561 1.2206682434 0.4037950367  
H -0.1088109948 5.5372074656 -0.5641730373  
H 1.6381035457 5.5282886372 -0.4581392796  
N 1.0200143256 -0.4079194399 0.7129899289  
H -5.0326286334 -1.1119750402 0.7182312223  
H -3.2922418261 -1.1251553598 0.6443735765  
H 0.2129512033 -1.0127537227 0.675755383  
H 1.9414912885 -0.80327404 0.6268546182  
N -7.5737710181 2.1368825603 0.2416631815  
O -8.7813882066 1.99594531 -0.4717298637  
C -9.9973834059 2.2112360418 0.276508573  
C -7.0584750154 3.6115382796 -1.7676005475  
C -6.9912237739 4.5242124685 0.5653598087  
C -7.1487511293 0.0139021905 1.3787638491  
C -7.0883190788 0.0497631631 -1.1308346903  
C -10.6807669891 3.4460093441 -0.3037785421  
C -9.688091508 2.3733659541 1.7756254208  
C -10.8485085876 0.9637769596 0.0721453109  
H -6.9142350685 2.7447752767 -2.41521831  
H -6.3723070132 4.3994062064 -2.0922814133  
H -8.0852077156 3.9659973988 -1.8861608874  
H -6.7705580248 4.2981354753 1.6125473865  
H -8.0274508363 4.8638090986 0.4954157783  
H -6.3357661902 5.3352878749 0.2325122845  
H -6.7537696496 0.4667631692 2.2921215148  
H -6.7954859194 -1.0193989116 1.3020145686  
H -8.2354267782 -0.033384326 1.4751105835  
H -6.981585177 0.6650439504 -2.0257163805  
H -8.1056854474 -0.3480962928 -1.1035181721  
H -6.3832932196 -0.783601112 -1.2071111817  
O -9.48924494 3.6466894901 2.1255728299  
C -9.0799797474 3.8613895585 3.4861744823  
C -8.9705567063 5.3559186667 3.6947769477  
O -9.6712846057 1.4572190348 2.5627063207  
H -10.868358625 3.2731025398 -1.367130775  
H -10.0512817428 4.3302230205 -0.192729973  
H -11.6352295051 3.6351606535 0.1962340766  
H -10.9780154817 0.798754248 -1.0006971846  
H -11.8320678864 1.083596254 0.5350592461

H -10.3614705447 0.0936762156 0.515931695  
H -8.123775111 3.348188814 3.6363072891  
H -9.8163596187 3.4026193413 4.1517622451  
H -8.2353273786 5.7913366488 3.0134608515  
H -8.6580318051 5.5641851053 4.721252383  
H -9.9348590357 5.8400332819 3.5210131524

1,4,5-TAAQ Aq-EP

C -5.3203163572 2.7066913352 -0.2144301046  
C -5.280047143 1.3651214837 0.1865369361  
C -4.0600592259 0.7152652416 0.3867898721  
C -2.8403281149 1.4575950746 0.1818523373  
C -2.9261971756 2.8205315948 -0.2083355008  
C -4.1764106614 3.4429114004 -0.4041699302  
C -1.7374657331 3.638178257 -0.440425558  
C -0.4342881067 3.0187454466 -0.2580588965  
C -0.3372940825 1.6496268118 0.1762809524  
C -1.5344391747 0.8301726305 0.3423998094  
C 0.7532776292 3.7788680507 -0.4883475609  
C 0.9545673806 1.0874299162 0.42521331  
C 1.9874097329 3.1846310289 -0.250705008  
C 2.083082898 1.872834294 0.2116076814  
O -1.8870808345 4.8489735503 -0.7793881771  
O -1.4414439 -0.4158651564 0.6073707827  
C -6.7466652781 3.1760742395 -0.3888693916  
C -6.683381129 0.8013408023 0.3009051267  
N -4.0187870527 -0.5957297899 0.8174127823  
H -4.1816038853 4.4851270978 -0.7056593556  
N 0.7159625945 5.077925766 -0.9982403747  
H 2.8915731818 3.7603651681 -0.4383493961  
H 3.0616405821 1.4441695895 0.4192167487  
H -0.2131967835 5.4912831227 -0.9426418055  
H 1.4784200291 5.6618695545 -0.6867283066  
N 1.1342920322 -0.1985377737 0.9420830044  
H -4.8087782396 -1.1759211331 0.5898938775  
H -3.086916294 -1.0063208032 0.7582476405  
H 0.3088952984 -0.7814289839 0.836780579  
H 2.0081496965 -0.6250784697 0.6702141629  
N -7.49922574 2.0631100188 0.274296586  
O -8.7329896862 1.7811721254 -0.3771908301  
C -9.7899799537 2.5168002935 0.2035937502  
C -7.0992022973 3.3606901954 -1.8701445716  
C -6.983193921 4.4843485622 0.375070508  
C -6.9993409077 0.099761202 1.6258695303  
C -7.0006209768 -0.1381179605 -0.8774486339  
C -9.74448234 2.3678901545 1.7235824512  
C -11.0765207896 1.9420529695 -0.3604934969  
H -6.9289709548 2.444400003 -2.439029609  
H -6.4578700196 4.1438657821 -2.2849082411  
H -8.1460542051 3.6580675048 -1.9946657432  
H -6.7767917333 4.3290596539 1.4369795405  
H -8.0126669224 4.8409858971 0.2698925874  
H -6.3096771362 5.259643924 -0.003299568  
H -6.6697329177 0.7219740186 2.462492738

H -6.5047799451 -0.8713048293 1.7076932743  
H -8.0799447781 -0.0518878411 1.7032053098  
H -6.9128825635 0.3827968703 -1.8330958413  
H -8.0098446867 -0.5492746813 -0.7907948765  
H -6.284261223 -0.9657522196 -0.8869814942  
O -9.4662991714 3.5271394004 2.3322800263  
C -9.2590730545 3.448932153 3.749523794  
C -8.9039996143 4.8399600028 4.2281711828  
O -9.9616779443 1.3349678671 2.3110775241  
H -11.0483616194 1.9916782638 -1.4514861733  
H -11.9405502072 2.5077570185 -0.0007771006  
H -11.1745150615 0.9003376984 -0.046620203  
H -8.4541410556 2.7310308931 3.9360260736  
H -10.1696762342 3.0665971155 4.2214955752  
H -8.0002669248 5.1968788233 3.728682839  
H -8.7241784675 4.8280370557 5.3065733332  
H -9.71679037 5.5401682054 4.0177859343  
H -9.6949184612 3.5825845129 -0.0403124127

1,4,5-TAAQ Aq-Me

C -5.3032664132 2.7380841728 -0.0258857556  
C -5.2826165125 1.3557822584 -0.0699113015  
C -4.0583445656 0.649020247 -0.1018489528  
C -2.850418572 1.4107072211 -0.0527310656  
C -2.9213252722 2.8203379988 0.0009599271  
C -4.1338696058 3.4928822326 0.0105789961  
C -1.685852976 3.6571360977 0.04958349  
C -0.3804534002 2.9945088205 0.0537519516  
C -0.3059030349 1.5609850478 0.0059905408  
C -1.5352776003 0.7481537106 -0.0468030375  
C 0.7874349116 3.7759843298 0.1195702437  
C 0.9466043664 0.9207437163 0.0232635807  
C 2.0374223692 3.0978949583 0.1477940907  
C 2.1099410525 1.737937395 0.1010523042  
O -1.8024888326 4.8853112549 0.0901176641  
O -1.4571775828 -0.4947762921 -0.0787585384  
C -6.7182794892 3.261636353 -0.0703829144  
C -6.6967658214 0.8051858785 -0.1481965751  
N -4.056881389 -0.7077583322 -0.2099342023  
H -4.1366282522 4.576673032 0.0459569795  
N 0.7956584917 5.1378901838 0.1387420003  
H 2.9494890269 3.6866610878 0.201220152  
H 3.0818030841 1.2511177075 0.1156418022  
H -0.0860745522 5.6279642729 0.1947038366  
H 1.6621254624 5.6206162199 0.3047677326  
N 1.1363800444 -0.4298028806 -0.0597570437  
H -4.9153208375 -1.2122353859 -0.083205375  
H -3.1708114355 -1.1871947174 -0.1324333466  
H 0.3284870771 -1.0315577735 0.0008518206  
H 2.05270882 -0.7971369553 0.1342420151  
N -7.4641501056 2.0181266979 0.2602625644  
O -8.7469863689 2.0045316405 -0.3180135641  
C -9.7383851727 2.1033895431 0.6915554556  
C -7.0348149711 3.8501148347 -1.4538689542

C -6.9880215372 4.3139101984 1.0075118062  
C -7.0443029846 -0.2872217983 0.8735722328  
C -7.0212069556 0.3044323972 -1.5661105037  
H -10.6971893803 2.0400433893 0.1721925355  
H -9.6698315578 3.0570742159 1.2247730064  
H -9.6482714933 1.2855812241 1.4136658849  
H -6.8001424102 3.1522472242 -2.2592605853  
H -6.4341903719 4.7524778545 -1.6030630297  
H -8.0930875169 4.113987973 -1.5177492866  
H -6.7977593929 3.8965306271 1.9990626911  
H -8.0289778255 4.6484056067 0.9553176993  
H -6.3489876514 5.1901067401 0.8596953222  
H -6.6494634407 -0.0372692599 1.8612002056  
H -6.6908751642 -1.2809537037 0.5804384335  
H -8.1342191081 -0.3569916018 0.9384079636  
H -6.8930959409 1.091732972 -2.3099218825  
H -8.0527047439 -0.0523819437 -1.6137914867  
H -6.3485244674 -0.5177166913 -1.8294375279

1,4,5,8-TAAQ Aq-STY

C -5.2194227585 2.5761791292 0.1897434409  
C -5.1216658045 1.2349864378 -0.0699941162  
C -3.8685358604 0.6058988566 -0.3258750888  
C -2.7102367324 1.4094554723 -0.2460472559  
C -2.8108393943 2.8129827879 0.0242990935  
C -4.0714922701 3.4215503843 0.2172992733  
C -1.5914699201 3.6380897555 0.0723114398  
C -0.2675140477 3.0112331623 -0.0599300021  
C -0.166861308 1.6096865062 -0.33024795  
C -1.3869386749 0.8020361107 -0.4744509819  
C 0.8929133223 3.8008383823 0.0638268417  
C 1.0943876647 0.9979428001 -0.4760411562  
C 2.1477681432 3.1554639984 -0.0844417456  
C 2.244016645 1.8186478841 -0.341980315  
O -1.6673964535 4.8732509582 0.2293849315  
O -1.2872859529 -0.401307673 -0.7872962669  
C -6.6657352873 2.9990182782 0.3861597709  
C -6.4895453235 0.5728839989 -0.0747979722  
N -3.8241974608 -0.7390439232 -0.5929040161  
N -4.2190565429 4.7603131932 0.4589189082  
N 0.9043309177 5.1384125834 0.3566609977  
H 3.0517876438 3.7507340151 0.0161428102  
H 3.2238724075 1.3592636852 -0.4447008007  
H 0.0298008162 5.6393819962 0.3084585146  
H 1.7691673421 5.6384209473 0.2346422693  
N 1.29714858 -0.3371526895 -0.6992559832  
H -4.6612366643 -1.1880779974 -0.9177182893  
H -2.9323749558 -1.1029855712 -0.9012495222  
H 0.4991379291 -0.9024417732 -0.9475744373  
H 2.2208631358 -0.6359780955 -0.9639375519  
H -3.3957923104 5.3362340501 0.3477013217  
H -5.126007272 5.1762835428 0.3542118965  
N -7.3788555961 1.6718163501 0.4489856776  
O -8.5776723909 1.7220446435 -0.2988202742



C -9.7732701319 1.5075365513 0.4721751795  
C -7.1457173184 3.8548807219 -0.7978790297  
C -6.8888743031 3.7165161871 1.7270933876  
C -6.5572277943 -0.6039217583 0.912166375  
C -6.8892069284 0.1389802108 -1.4950873128  
H -10.531194324 1.5522788271 -0.3193978993  
C -9.8276034318 0.1323671328 1.113048927  
H -7.0845975018 3.2940949819 -1.7334623213  
H -6.5322494843 4.7527856584 -0.9081902645  
H -8.181007823 4.1648272777 -0.6466199365  
H -6.7032810733 3.0140987639 2.5436673669  
H -7.9188655999 4.0703742611 1.8011719318  
H -6.2250671009 4.5715172934 1.8631280942  
H -6.4649927273 -0.2199672273 1.9315812983  
H -5.7585672879 -1.3298932289 0.7550161033  
H -7.5114992046 -1.1254431696 0.8178726291  
H -6.8987334157 0.9940017493 -2.1748501944  
H -7.8859628403 -0.3061437765 -1.4924289761  
H -6.1892436548 -0.5980129572 -1.8966686224  
H -9.6928356809 -0.6376867299 0.3488076166  
H -10.8015845562 -0.0166966321 1.5882558108  
H -9.0477407178 0.0161627747 1.8675637964  
C -10.0496878174 2.6528692276 1.4271793627  
C -10.4676342884 3.8771669807 0.8945884521  
H -10.6171979631 3.9622109955 -0.1797028994  
C -10.6782664926 4.9809041566 1.7160171509  
H -10.9962233442 5.9255332299 1.2856234849  
C -10.4858683592 4.8676080616 3.0937759516  
H -10.6489072141 5.724937644 3.7393069932  
C -10.0928307563 3.6466620431 3.637085317  
H -9.9454027449 3.5509573797 4.7083512749  
C -9.8769230086 2.5460067003 2.8077680096  
H -9.5530166769 1.6071244826 3.2448894814

1,4,5,8-TAAQ Aq-EIB

C -5.3104845077 2.3964437182 0.308256056  
C -5.4136811364 1.0516663723 0.0740481966  
C -4.2648598145 0.2456501672 -0.1668697488  
C -3.00329492 0.8801827595 -0.110066519  
C -2.8994529036 2.2836160576 0.1600294421  
C -4.0578006765 3.0661611647 0.3525093742  
C -1.572600419 2.917906852 0.256214838  
C -0.3543991265 2.1141104288 0.0796113844  
C -0.4588885774 0.7271318842 -0.259319154  
C -1.782234985 0.0936756358 -0.3606930867  
C 0.9080935482 2.7231820545 0.2198801665  
C 0.7002617565 -0.0448034526 -0.473859044  
C 2.0565224462 1.9156132749 0.0127053991  
C 1.9572010136 0.5972303873 -0.3244385022  
O -1.4729117086 4.1381499416 0.491899199  
O -1.8583443511 -1.1161135783 -0.653674218  
C -6.674698039 3.0444634374 0.4362174776  
C -6.8667440348 0.6053122256 0.0829311515  
N -4.4162444974 -1.0973860615 -0.4018127618

N -4.036303284 4.4271997282 0.5272484108  
N 1.1138474391 4.0278532874 0.5820570719  
H 3.0373139699 2.3701914418 0.1268940778  
H 2.8595649785 0.0136818922 -0.4883623953  
H 0.3174942852 4.6478976894 0.5732778272  
H 2.0353175656 4.4097526616 0.4460387253  
N 0.7093072384 -1.360794358 -0.8524354336  
H -5.3113384811 -1.4237421157 -0.7192841736  
H -3.5896998525 -1.5898490102 -0.7141094611  
H -0.1647183894 -1.8647798386 -0.8211818182  
H 1.5741642949 -1.8676228358 -0.7596572962  
H -3.1289449097 4.8375728403 0.7032356489  
H -4.8403922006 4.8592691625 0.9481415223  
N -7.5653929555 1.8446429368 0.5814662392  
O -8.7633178376 2.0469237916 -0.1450619753  
C -9.9597672449 2.0989455506 0.6395338693  
C -6.9696470524 3.8641242127 -0.8316707207  
C -6.8169962309 3.9038208316 1.7151337644  
C -7.1144041721 -0.5165012047 1.1016948882  
C -7.3453682089 0.1968955825 -1.3199536279  
C -11.0640207486 2.1476259558 -0.4178040244  
C -10.0353343696 3.3974272649 1.4575776218  
C -10.1303932242 0.9095705784 1.567818694  
H -6.9316379951 3.2264518047 -1.7180184551  
H -6.2099754629 4.6432948019 -0.9429297862  
H -7.9584525942 4.3194043149 -0.7722091891  
H -6.053034227 3.6451051418 2.4549814975  
H -7.781323372 3.7183211651 2.1872701325  
H -6.7581371039 4.977848245 1.4992723596  
H -6.8711462777 -0.1559017582 2.1043854541  
H -6.5062507661 -1.4007069481 0.9044850551  
H -8.1635025529 -0.8163638926 1.0831132869  
H -7.2378863775 1.0206726787 -2.0284929922  
H -8.3974883428 -0.0947813456 -1.2913295511  
H -6.7690179039 -0.6493364293 -1.7022900172  
O -9.7641314661 4.4794108237 0.7160697535  
C -9.8271463807 5.7407504443 1.4027561331  
C -9.3665831198 6.8059666841 0.4321709642  
O -10.3439937861 3.4554541763 2.6247303486  
H -11.0514378341 1.2150750934 -0.988051573  
H -10.8972982191 2.9849799115 -1.0982215021  
H -12.041879294 2.2579809733 0.0590698575  
H -10.1646248736 -0.0068180522 0.9725353194  
H -11.0654510492 1.008569648 2.1225708885  
H -9.3090435295 0.8560456113 2.2837287257  
H -9.1896827511 5.6871401059 2.2909070496  
H -10.8555945729 5.9020118654 1.7399064594  
H -8.3322911841 6.6291186953 0.1243147875  
H -9.4233347421 7.7889211374 0.9067737903  
H -9.9958238981 6.8143957895 -0.4612658823

1,4,5,8-TAAQ Aq-EP

C -5.2926888075 2.3891022238 0.3228850663  
C -5.3931307082 1.0409648202 0.1069559065

C -4.2445705018 0.2360000995 -0.1372599029  
C -2.9847823787 0.8753577357 -0.1007112861  
C -2.8831698697 2.2824143607 0.1504230731  
C -4.0421660519 3.0638763466 0.3439577441  
C -1.5574757604 2.9218644974 0.226940043  
C -0.3383467334 2.1188598354 0.053509866  
C -0.4412967345 0.7275617296 -0.2678526217  
C -1.7634981626 0.0897083292 -0.3534431262  
C 0.9234024278 2.7325249452 0.1795347692  
C 0.7184762745 -0.0441928662 -0.4795567744  
C 2.072663005 1.924930103 -0.0233296257  
C 1.9747249345 0.6023963247 -0.3440231445  
O -1.4597034069 4.1456846024 0.4441135368  
O -1.8388803223 -1.1230057955 -0.6341492996  
C -6.658035483 3.0330317271 0.4615169495  
C -6.8444738356 0.5905587031 0.1322001261  
N -4.3945271369 -1.1101560378 -0.3551749902  
N -4.0232576432 4.4272867428 0.4990421788  
N 1.1277663154 4.0421111684 0.5241765107  
H 3.0529560096 2.3830549796 0.0804912887  
H 2.8775934562 0.0189414411 -0.5054203018  
H 0.329887039 4.6601490381 0.5109551232  
H 2.0477744355 4.4244058034 0.3796659262  
N 0.7282918351 -1.3644136687 -0.8424659405  
H -5.2919867172 -1.4420598585 -0.6601123129  
H -3.5701735811 -1.6034088652 -0.6719121703  
H -0.144862393 -1.8693489469 -0.8022804631  
H 1.5945399808 -1.868563921 -0.7483972365  
H -3.1153480691 4.8430060225 0.6595130095  
H -4.8243825635 4.863090625 0.9216630631  
N -7.5395315551 1.8298471045 0.633551586  
O -8.754435276 2.017187478 -0.0726381077  
C -9.9105424294 2.0769675403 0.7546760173  
C -6.977221967 3.8374517924 -0.8099106097  
C -6.7847574163 3.9065766314 1.7325710963  
C -7.0860803253 -0.5270350262 1.1563069967  
C -7.3326211769 0.1771608755 -1.2661043526  
C -10.0002833671 3.3835251961 1.5466946946  
C -10.1176399692 0.8816964312 1.6623087439  
H -6.9485561653 3.1919024875 -1.6907465553  
H -6.2246671896 4.6205057217 -0.9403453251  
H -7.9680668641 4.2866480529 -0.7394748831  
H -6.0072566285 3.6612876056 2.4627481636  
H -7.7397709695 3.7219878506 2.2234402092  
H -6.7355479073 4.9781547953 1.5027682113  
H -6.8235040956 -0.1680913169 2.1546972295  
H -6.4919490243 -1.4188085988 0.9508717196  
H -8.1388301842 -0.8147855779 1.1538045146  
H -7.2346238422 0.9999972314 -1.9770190254  
H -8.3823805517 -0.1209016838 -1.2293573585  
H -6.7531627888 -0.6658253772 -1.6510996763  
O -9.7579926671 4.4517583341 0.7776656751  
C -9.8229249206 5.7266465359 1.4396339731  
C -9.3970277275 6.7771930454 0.4378486671

O -10.2930933487 3.4569899705 2.7166337736  
H -10.169157538 -0.0294056963 1.0619325656  
H -11.0541062083 0.9986323535 2.2111669171  
H -9.3035450706 0.8038198396 2.3847495846  
H -9.1659257524 5.6990406635 2.3147149339  
H -10.8459938881 5.8817128484 1.7953759658  
H -8.3668081501 6.60815657 0.1125928437  
H -9.4580132276 7.7690027168 0.8930792022  
H -10.0443637337 6.7578977021 -0.4422933974  
H -10.7172269269 2.1279036582 0.012091022

1,4,5,8-TAAQ Aq-Me

C -5.3182429969 2.7508258899 -0.0356133965  
C -5.2679399581 1.3790833506 -0.0853938063  
C -4.035702159 0.6741482955 -0.1306831323  
C -2.8493158249 1.4373377442 -0.062419042  
C -2.9017900956 2.8681336204 -0.0104823155  
C -4.1410003219 3.5454260943 -0.0264847372  
C -1.6508250942 3.6461073427 0.0283450142  
C -0.3541605112 2.9570670746 0.0996901593  
C -0.3017253731 1.5272833093 0.0476832241  
C -1.5446773141 0.752223676 -0.0767714034  
C 0.830408562 3.7125766745 0.2050505198  
C 0.935245054 0.8548187723 0.1010418796  
C 2.0604247652 3.0061409436 0.259506657  
C 2.1104184798 1.6435423554 0.2098851365  
O -1.6823875838 4.8923503393 0.0039712867  
O -1.4850522733 -0.4879704637 -0.1913349085  
C -6.7569464521 3.2415215551 -0.0338223481  
C -6.6669008633 0.7856288169 -0.1228627614  
N -4.0542409272 -0.6961448944 -0.1910206038  
N -4.2598912639 4.9114391304 0.0123834026  
N 0.8837960189 5.0764316556 0.296385434  
H 2.982003271 3.5758278767 0.3480368561  
H 3.0714508216 1.1379018758 0.2591988057  
H 0.0394863554 5.5984968833 0.1162101912  
H 1.7794767771 5.523473793 0.1949338546  
N 1.088511523 -0.5044522375 0.0929335399  
H -4.8882478545 -1.1378485673 -0.5354095183  
H -3.1667649186 -1.1493393007 -0.3604624177  
H 0.2840744124 -1.0726720586 -0.1258736263  
H 2.0143143356 -0.8765019266 -0.0368002905  
H -3.4084348474 5.4394478663 -0.1215100211  
H -5.1249702511 5.3147210854 -0.3010953132  
N -7.4541194415 1.9723234776 0.3088502733  
O -8.7564000181 1.9438695987 -0.2223077349  
C -9.7168620674 1.8707238522 0.8207360079  
C -7.1599790373 3.8161861223 -1.4036170831  
C -7.1048414772 4.2413013568 1.0782914743  
C -6.9377150917 -0.3147019717 0.9131551642  
C -7.0305613342 0.2835955199 -1.5316645986  
H -10.6891602721 1.8536251941 0.3234217539  
H -9.6528848999 2.7401810982 1.481822816  
H -9.5883112955 0.9621681129 1.4166349733

H -6.9541927673 3.114424135 -2.2131062317  
H -6.6051505047 4.7353361551 -1.6152343489  
H -8.2267722827 4.0503688663 -1.4091545496  
H -6.7426707765 3.8748565837 2.0413963708  
H -8.1935721182 4.3381952433 1.1244754044  
H -6.6970935369 5.2395062586 0.9081856012  
H -6.6007561867 0.006698692 1.9011742163  
H -6.4584395405 -1.2654605155 0.6724203661  
H -8.0163027344 -0.4941124367 0.9493688232  
H -6.8789856599 1.0552726883 -2.2877258164  
H -8.0773533609 -0.0270725853 -1.5568430254  
H -6.4105090884 -0.5747220182 -1.8078461758

AQ-NO radical

C 0.6230894508 1.2601415012 0.2232851445  
C 0.3225599994 -0.0913431029 0.4315199383  
C 1.3202545521 -1.0535092974 0.3889818999  
C 2.6345361622 -0.6535761839 0.1344185331  
C 2.9360332934 0.7022677951 -0.0744771869  
C 1.9248615157 1.665402736 -0.0299322272  
C 4.3351186243 1.1487095611 -0.3479174959  
C 5.4013820122 0.1040486171 -0.3915294679  
C 5.1003615338 -1.2496545077 -0.1829662802  
C 3.7022281266 -1.6974405926 0.0905778802  
C 6.7174325674 0.4939165362 -0.6452523736  
C 7.726824327 -0.4616335797 -0.6905183039  
C 7.426838815 -1.8106712753 -0.4826723315  
C 6.1173651617 -2.2045891925 -0.22949469  
O 4.5956333784 2.3240195264 -0.5287966757  
O 3.4401556192 -2.8723501327 0.2718080531  
C -0.6093138402 2.1253766119 0.3143336776  
C -1.1490153356 -0.301667483 0.6883486643  
H 8.2173675815 -2.5533367368 -0.5188023941  
H 5.8584815198 -3.2453904183 -0.0648096781  
N -1.6352001844 1.094882016 0.5980799026  
O -2.8546978176 1.3902783933 0.7554325998  
C -0.9417191127 2.8300320074 -1.0036263275  
C -0.5521877423 3.1243455407 1.4731161785  
C -1.437059848 -0.8552352545 2.0864166783  
C -1.8270319409 -1.1509709295 -0.3900811426  
H -0.9666732073 2.1135707484 -1.8291636095  
H -0.1900589799 3.5939277457 -1.2228359229  
H -1.9216398211 3.3069608792 -0.9183372268  
H -0.3002507838 2.6171511061 2.4083923599  
H -1.5284163324 3.604071045 1.5817871557  
H 0.2026087828 3.8905311342 1.2735652871  
H -0.9383093736 -0.2530787278 2.8506910788  
H -1.0821546816 -1.8870372747 2.163902604  
H -2.515174647 -0.833664603 2.2657788715  
H -1.6055846982 -0.758983304 -1.3864542854  
H -2.9088367318 -1.1322752723 -0.2341068615  
H -1.4751795427 -2.1851065348 -0.3322324364  
H 1.1169582226 -2.109250475 0.5466927472  
H 2.1878843669 2.7066814561 -0.1953170981

H 6.9242424125 1.5473308754 -0.8032212939  
H 8.7499665961 -0.1582409539 -0.8878139447

AQ-NO cation

C 0.6354781821 1.2564746111 0.2216477591  
C 0.33520831 -0.0935867407 0.4297086544  
C 1.3274237544 -1.0589967334 0.3885381812  
C 2.6390988245 -0.652017611 0.133670952  
C 2.9395193231 0.6987535373 -0.0745614345  
C 1.9337310555 1.6670712271 -0.0315894963  
C 4.3488470672 1.1467926348 -0.3499495198  
C 5.4067167525 0.1047701117 -0.3920219456  
C 5.1047742977 -1.2528510672 -0.1827297621  
C 3.715290662 -1.7020974514 0.0896438421  
C 6.7223842537 0.4946019109 -0.6454134259  
C7.731005479 -0.4630037874 -0.6900375727  
C 7.4310786208 -1.8115096014 -0.4822449506  
C 6.121381671 -2.2075898179 -0.2290034219  
O 4.5800136662 2.3263028876 -0.5259764804  
O 3.4247715909 -2.8672410712 0.2732333953  
C -0.5810942935 2.1401094308 0.3078822261  
C -1.1299239552 -0.3276670442 0.6882305522  
H 8.2215304392 -2.553678099 -0.5181997637  
H 5.8671324222 -3.2495704467 -0.0648481034  
N -1.6421295621 1.0967343023 0.599337464  
O -2.7783820208 1.37204429 0.7458959835  
C -0.9680070826 2.8217299761 -1.0112710923  
C -0.5742561288 3.1198281878 1.4887888328  
C -1.4542982195 -0.8373990667 2.0987300887  
C -1.8479151705 -1.1349738323 -0.4013898862  
H -1.0198686994 2.1021795067 -1.8318029673  
H -0.1871278579 3.549715663 -1.2437529147  
H -1.9208096718 3.3461905673 -0.9086858783  
H -0.3488584058 2.6101461472 2.4285409097  
H -1.5316054948 3.6408470173 1.5624480854  
H 0.2134993899 3.8530322797 1.29998902  
H -0.9787202273 -0.2205506467 2.8649057073  
H -1.054758556 -1.8511434582 2.1792621622  
H -2.5346463711 -0.8697657205 2.2574774857  
H -1.6492434995 -0.7278245048 -1.3956029229  
H -2.9236861651 -1.1635800001 -0.213468074  
H -1.4555127762 -2.1540059124 -0.3644667381  
H 1.132521734 -2.1169711503 0.5452490959  
H 2.20529077 2.7064642933 -0.198238666  
H 6.9339226281 1.5469264072 -0.8040884736  
H 8.7539032636 -0.1600512258 -0.8870669073

AQ-NO anion

C 0.6212436645 1.2438626491 0.0990342705  
C 0.3196671483 -0.1121876544 0.3076375046  
C 1.3244717412 -1.069123645 0.2886691238  
C 2.6480750544 -0.6715067966 0.0582958363  
C 2.9509531291 0.690388684 -0.1511656654  
C 1.9288702606 1.6484770596 -0.1293220299

C 4.3420643892 1.1389412533 -0.3962760029  
C 5.4193399455 0.0938506878 -0.4220671317  
C 5.1189038892 -1.2570180465 -0.2142912271  
C 3.7093911975 -1.7057805115 0.04123437  
C 6.73871514 0.4854644796 -0.6567505986  
C 7.7524934813 -0.4661423086 -0.6841352705  
C 7.4523910093 -1.8155253241 -0.4765802924  
C 6.1393806803 -2.2094034757 -0.2422456751  
O 4.6322559303 2.3117135574 -0.574999774  
O 3.4753617022 -2.8902544473 0.2251282272  
C -0.6343461993 2.0660768382 0.2175985171  
C -1.153447062 -0.2679095207 0.5766395025  
H 8.2451811557 -2.5573231893 -0.498281043  
H 5.8756571428 -3.2491647247 -0.0774684194  
N -1.6693813429 1.015136457 0.0306735049  
O -2.9072869944 1.3643064359 0.5107628794  
C -0.8079535361 3.0937523952 -0.9017847255  
C -0.7193577493 2.7861279223 1.580392531  
C -1.4421273114 -0.463854941 2.0803679112  
C -1.8082292036 -1.4046146372 -0.2097776996  
H -0.712189398 2.6033988014 -1.874660057  
H -0.0782506472 3.9098754327 -0.8265987595  
H -1.8200895502 3.5020424883 -0.8176769417  
H -0.3254614173 2.174925993 2.3968503626  
H -1.7870411098 2.9610750644 1.7553792341  
H -0.1678159419 3.7332187629 1.5645476876  
H -0.7791913479 0.1349824341 2.7106353448  
H -1.3349014728 -1.514984891 2.372013679  
H -2.4727697449 -0.1223189679 2.2297331729  
H -1.5800759787 -1.2997247361 -1.2742266792  
H -2.8909569669 -1.3138627286 -0.076885656  
H -1.4791136375 -2.3903349173 0.142664616  
H 1.1147068483 -2.1232695451 0.4476815441  
H 2.1854773217 2.6915064543 -0.2928792943  
H 6.9407796538 1.5400799737 -0.8141079049  
H 8.7782861269 -0.1602588155 -0.8669889719

#### Me-Pyridine cation

C 6.7098238181 -0.4817046836 0.0784553169  
C 6.3348162693 -1.7858311281 -0.1784467915  
C 4.9778183492 -2.0962662506 -0.2707545992  
C 4.0336848064 -1.0867177338 -0.1022183506  
C 4.4639139816 0.2034480851 0.1533894106  
N 5.7796297331 0.4844401145 0.239090714  
H 7.7444691532 -0.1680256352 0.1634572599  
H 7.1011904152 -2.5413589018 -0.3031066723  
H 4.6614962615 -3.1143186065 -0.4718819128  
H 2.9705225974 -1.2848429077 -0.1659746872  
H 3.7822102645 1.0337095713 0.294323719  
C 6.2339967396 1.8665751236 0.5127580674  
H 5.3637588329 2.5113027026 0.6138273667  
H 6.8506619482 2.2071418077 -0.3193090508  
H 6.8074368301 1.8730084441 1.4399702013

Me-Pyridine radical

C 6.7876051964 -0.6738679376 -0.0787672576  
C 6.3042832512 -1.94803959 -0.152019179  
C 4.9115683757 -2.206469831 -0.1345566813  
C 4.0519715615 -1.0827105883 -0.064629642  
C 4.5510234046 0.185438673 0.0080035265  
N 5.9272521151 0.4176719627 0.0577692304  
H 7.8447584788 -0.4373142192 -0.0878515814  
H 7.0188711603 -2.7611672754 -0.2254274104  
H 4.522192354 -3.2135033999 -0.1975676453  
H 2.9741582543 -1.207242343 -0.0684806013  
H 3.9258195112 1.0683707678 0.0642135361  
C 6.431939507 1.7543057788 -0.1696985204  
H 6.482626694 1.9953829613 -1.2409954287  
H 7.4325134271 1.8436825845 0.2593309541  
H 5.7801567089 2.4786524561 0.3240067003

Pyridine

C 6.6750398156 -0.4735834979 0.079142692  
C 6.3237493266 -1.7976694055 -0.1809671347  
C 4.9727070511 -2.1181849295 -0.2750436774  
C 4.0353973606 -1.1034893983 -0.1053619085  
C 4.4945480047 0.187858353 0.1511808604  
N 5.787080458 0.5099120037 0.244111609  
H 7.721333803 -0.1885511145 0.1589907815  
H 7.0930109649 -2.5521517824 -0.3053571732  
H 4.6569042693 -3.1372341515 -0.4763475008  
H 2.9709231146 -1.3017461392 -0.1691755282  
H 3.7895158315 1.0041400621 0.2888869795

AQ-Me-Pyridine Transition state (neutral)

C 0.3191256666 0.9835642651 0.4673311532  
C 0.2844490868 -0.3029101618 1.0230901161  
C 1.3798326794 -1.1467650727 0.9226388879  
C 2.5261959981 -0.6961052841 0.2584081968  
C 2.5609866447 0.594535304 -0.2990874248  
C 1.4495006235 1.4383349153 -0.1940756126  
C 3.7686592821 1.0921812918 -1.0148340705  
C 4.9480598163 0.1764788208 -1.1115112032  
C 4.9133708537 -1.1094582595 -0.5561692533  
C 3.6957661514 -1.6123462608 0.1533531707  
C 6.0968426393 0.6206441158 -1.7686285819  
C 7.2046964366 -0.2138348749 -1.8699726962  
C 7.1700724261 -1.4965972904 -1.3160724998  
C 6.027648994 -1.9438107195 -0.661216622  
O 3.8047875675 2.2056218183 -1.5093603508  
O 3.6716531411 -2.7359055445 0.6252016059  
C -0.9818889779 1.6984196868 0.7356276281  
C -1.0421517572 -0.537794502 1.7018076644  
H 8.0366687031 -2.1452929358 -1.3965063791  
H 5.9740851083 -2.9346723458 -0.2220663786  
N -1.8556654264 0.5512434137 1.0988247948  
O -2.9569193237 0.9016053856 1.8409656559  
C -4.5137189899 0.3891182843 0.5566742395



C -1.5648554569 2.3766971475 -0.5051578492  
C -0.8298684105 2.7405874241 1.8562780599  
C -0.9155451857 -0.4422242728 3.2314982556  
C -1.6795865359 -1.8784908873 1.3335562773  
H -4.811129645 -0.2517045299 1.3786293283  
H -3.6068668253 0.1284604996 0.0117669742  
H -4.7642973031 1.4396787333 0.6474176595  
H -1.6381161075 1.6590854464 -1.3280283581  
H -0.9540603772 3.2276249647 -0.8256116818  
H -2.5679152947 2.7443741757 -0.261503542  
H -0.291699866 2.3382416373 2.7165421949  
H -1.8295156116 3.0368747985 2.1837907091  
H -0.2812625348 3.6142286164 1.4888188186  
H -0.3433464492 0.4350472237 3.5389848044  
H -0.4139891429 -1.3321410315 3.6261360447  
H -1.9209787818 -0.3618042198 3.65217759  
H -1.7366181979 -1.9830512958 0.2457839853  
H -2.6932292807 -1.9072204868 1.748740688  
H -1.1143666955 -2.721724005 1.7450552213  
C -6.9691986512 0.0593670039 -0.3506152914  
C -7.9290264691 -0.3145519215 -1.2791607837  
C -7.5086570834 -0.8459095133 -2.4976883717  
C -6.1463958732 -0.9850525123 -2.7458544348  
C -5.2453220461 -0.5877414005 -1.765843124  
N -5.6644298978 -0.0809309999 -0.6046794435  
H -7.2182936289 0.4804086828 0.6195443372  
H -8.9802935538 -0.1902406836 -1.0479516551  
H -8.2360456044 -1.1474980291 -3.2440173496  
H -5.7790464943 -1.3934514093 -3.6798683807  
H -4.1673026431 -0.6648307725 -1.8848998824  
H 1.3798455951 -2.149194321 1.341992043  
H 1.5032469717 2.4295963006 -0.6359217724  
H 6.0969993222 1.620922598 -2.1893128829  
H 8.0981514151 0.1323969897 -2.3799952281

AQ-Me-Pyridine Transition state (radical)

C 0.6165326073 1.2511737919 0.1986082118  
C 0.32054352 -0.101740876 0.3749506237  
C 1.3184989191 -1.0621197195 0.3242196287  
C 2.6319337808 -0.6484994587 0.0924978789  
C 2.9290915424 0.7089882865 -0.0879837886  
C 1.9170665256 1.669892464 -0.0357047576  
C 4.3362619109 1.1657768085 -0.3399311407  
C 5.4021534037 0.1276807342 -0.3847393756  
C 5.1032547755 -1.2331909144 -0.2037118771  
C 3.7088472594 -1.6917081654 0.0404136404  
C 6.7199058139 0.5269917511 -0.6118683217  
C 7.7334552024 -0.4249745671 -0.657706284  
C 7.4362147924 -1.7782531138 -0.4777477554  
C 6.1246124535 -2.1830739785 -0.2514536607  
O 4.5752606238 2.3469326576 -0.4986691058  
O 3.4296323 -2.8650993159 0.1949441444  
C -0.6128197585 2.115748662 0.3108973689

C -1.153682711 -0.3422750568 0.6202450884  
H 8.2304043875 -2.5165661066 -0.5141722129  
H 5.8708831846 -3.2283513328 -0.1089516546  
N -1.6561975197 1.0607115131 0.4872713349  
O -2.8272128981 1.450059385 0.8346669924  
C -4.3194514119 0.5663656539 0.352681582  
C -0.9230207862 2.9040386511 -0.9635903909  
C -0.5866571562 3.0248383503 1.5435358079  
C -1.4254743425 -0.8495513038 2.0406107115  
C -1.7517905414 -1.2668198685 -0.4472503623  
H -4.20169799 -0.2650793498 1.030170899  
H -4.0205105627 0.4708841375 -0.6820818429  
H -4.9086153776 1.4185786469 0.656954991  
H -0.9441181078 2.2453710545 -1.8358327435  
H -0.1457705128 3.656549757 -1.1189833491  
H -1.8846782508 3.4143523837 -0.8646309179  
H -0.3971705456 2.4476982829 2.4521210119  
H -1.5348288824 3.5574319713 1.643340225  
H 0.218063976 3.7546130447 1.4247058481  
H -0.9798132904 -0.1845001161 2.7838327979  
H -0.9790525947 -1.8412502282 2.1511192807  
H -2.4974865979 -0.9321671907 2.2365185231  
H -1.6675960432 -0.819394422 -1.4414839399  
H -2.794688121 -1.5171905542 -0.2410415333  
H -1.1852071666 -2.201643758 -0.4498504039  
C -7.0506053232 -0.5454287925 0.7170395523  
C -8.2762780607 -1.128602433 0.4178045723  
C -8.5311579827 -1.5005782899 -0.9001630017  
C -7.5554993101 -1.2767228454 -1.8682331909  
C -6.3576942723 -0.6872766142 -1.4792304919  
N -6.1154224392 -0.3325485858 -0.2141987179  
H -6.8054474703 -0.2357510303 1.7305115023  
H -9.0088411119 -1.2836585876 1.2013072883  
H -9.4776916361 -1.9575479821 -1.1691141389  
H -7.7139747677 -1.5496800713 -2.905032481  
H -5.5682035394 -0.4906227937 -2.2009432537  
H 1.1267378644 -2.1236139194 0.4594250836  
H 2.1822265149 2.7142052496 -0.1785113103  
H 6.9277967734 1.5830919874 -0.7488240566  
H 8.7580199516 -0.1144098833 -0.8337335277

AQ-BF<sub>3</sub>-Me (radical)

C -7.1352472878 0.7769159552 -0.5559329065  
C -6.2921310143 1.6743407504 -1.2184319384  
C -4.9168948927 1.4758213269 -1.2037940184  
C -4.3844648055 0.3746706838 -0.5300440224  
C -2.9155609081 0.165512538 -0.5146843407  
C -2.3867703895 -1.059779755 0.1707620163  
C -1.0054776312 -1.240902345 0.117998982  
C -0.4455001732 -2.3549188518 0.7328718106  
C -1.2297951134 -3.3015657187 1.3696445707  
C -2.6566825204 -3.1866187771 1.3940430152  
C -3.2249396024 -1.9896293144 0.8113749256  
C -4.6869962048 -1.7087337401 0.8788645464

C -5.224165852 -0.5244245809 0.1329136333  
C -6.6052712644 -0.3161026653 0.1206458037  
C -0.3481399718 -4.4149739429 1.9199947903  
N 0.9854095864 -3.742055886 1.8399649502  
C 1.0133052942 -2.7350568593 0.7522156128  
O -5.4658032699 -2.3931195522 1.5245392249  
O -2.1584589301 0.953882865 -1.0517256034  
O 2.0197709203 -4.6835186064 1.7046325057  
C 2.9428174479 -4.5501173571 2.7750779611  
H -8.2091424601 0.9340645608 -0.5682813695  
H -6.7116316174 2.5266792163 -1.7431931831  
H -4.2362620818 2.1564505212 -1.7045948142  
H -0.4039428105 -0.49980078 -0.3991485377  
C -3.4381166067 -4.2446896702 1.8961031326  
H -7.2406922108 -1.0213946964 0.6451280671  
C -0.4446082736 -5.6937565365 1.068691578  
C -0.5642012161 -4.7495316603 3.4015518999  
C 1.4458230607 -3.2759980812 -0.6202057553  
C 1.9264996505 -1.5771440852 1.1588606312  
H 3.4179247101 -3.5640414032 2.7676257071  
H 3.695579438 -5.3247491049 2.613777401  
H 2.4506734116 -4.7012010293 3.7408544629  
B -3.3320643196 -4.6142463042 -1.1582027142  
H -4.5142933739 -4.2029988484 1.9095345976  
H -2.9548933372 -5.1357557447 2.266328873  
H -0.3249306645 -5.4857575885 0.0041150931  
H -1.4168893465 -6.1725834771 1.2078617757  
H 0.3359888999 -6.3931618802 1.3752449775  
H -0.5781029726 -3.8346304331 3.9985407082  
H 0.2719655427 -5.3718976694 3.7350233368  
H -1.4814678377 -5.3115553755 3.5852358042  
H 0.7729526076 -4.0533532712 -0.985585916  
H 2.4565070107 -3.6858775095 -0.5580977793  
H 1.4396148138 -2.4571054614 -1.3461903762  
H 1.6455449313 -1.2004960099 2.1452354914  
H 1.8665255552 -0.7608862554 0.4320927159  
H 2.9666654934 -1.9163526497 1.1902065479  
F -2.2213322592 -4.027366345 -1.5586105847  
F -4.4752902475 -3.9605453523 -1.1981507547  
F -3.3079669071 -5.8814232426 -0.7938625353

AQ-BF<sub>3</sub>-Me-Pyridine transition state (radical)

C -7.459087872 -0.1852848423 -0.8280663193  
C -6.8567281627 0.6872993837 -1.7407715872  
C -5.4758228362 0.8428969365 -1.7500470376  
C -4.6940045186 0.1101160538 -0.8538678382  
C -3.2143652052 0.2505145908 -0.8723536193  
C -2.4152158224 -0.7533567321 -0.0952014288  
C -1.0448422682 -0.7927714218 -0.3471654265  
C -0.3060604276 -1.7805463114 0.2765523498  
C -0.9022172293 -2.7324404429 1.1030864647  
C -2.2846301752 -2.7328345035 1.3701414685  
C -3.0214607775 -1.6710341416 0.779103201  
C -4.4750319551 -1.4728488877 1.0867530599

C -5.2973167067 -0.7536210262 0.064181889  
C -6.6845801292 -0.8939126548 0.083943639  
C 0.1298968589 -3.7114861221 1.6513093646  
N 1.3753952974 -3.126278646 1.054200892  
C 1.1730789112 -2.0022057155 0.1075117499  
O -4.9799596056 -1.7891959704 2.1453410214  
O -2.66227156 1.1085154066 -1.5400470987  
O 2.5293487905 -3.6887895149 1.0660837388  
C 3.1977068235 -4.5436144145 2.5678731855  
H -8.5375923707 -0.3088854989 -0.8307001178  
H -7.4693547437 1.2424318109 -2.4441692  
H -4.9819716558 1.5174376006 -2.4420041555  
H -0.6101808244 -0.0684132451 -1.0293570394  
C -2.9708771767 -3.8732733749 2.0208899227  
H -7.1275556685 -1.5679012343 0.8094779609  
C -0.0156478649 -5.1441069312 1.1231385991  
C 0.2076395452 -3.631718391 3.187261573  
C 1.5397471269 -2.4549732482 -1.3100742298  
C 2.0271817734 -0.8146298053 0.5552194811  
H 2.9785717799 -3.6925956837 3.1956449791  
H 4.1433931768 -4.6043110558 2.0490567425  
H 2.5007445413 -5.3629549886 2.4937428596  
B -3.6571593429 -4.7947781678 0.800304459  
H -3.7710143672 -3.5573792099 2.6858214503  
H -2.2889276462 -4.5197984743 2.573760325  
H -0.1518294082 -5.1413089431 0.0403993186  
H -0.9040591478 -5.6142155214 1.5434393536  
H 0.8663792114 -5.739992647 1.377950781  
H 0.6504000749 -2.680198306 3.4979157725  
H 0.7792291934 -4.4591314347 3.6172646015  
H -0.8017856974 -3.6772127691 3.5968586617  
H 0.9359082621 -3.3162619843 -1.6062704483  
H 2.600265125 -2.7137791055 -1.3653065758  
H 1.3340916996 -1.6363660859 -2.0044714091  
H 1.7624022748 -0.5099787584 1.5714548463  
H 1.8447516811 0.0300529394 -0.1140449565  
H 3.0889267258 -1.0738597271 0.5127391154  
F -2.6399816337 -5.1912758954 -0.1080458799  
F -4.6057800371 -4.0143276403 0.1088298945  
F -4.2503132926 -5.9286539408 1.3657550274  
N 4.005779845 -5.4548282731 4.1588712398  
C 5.1983905996 -5.0745884014 4.6242645466  
H 5.7027138763 -4.2846980781 4.0728592786  
C 5.7677423292 -5.653656196 5.752074928  
H 6.7383932967 -5.3209713694 6.1008377304  
C 5.0631794438 -6.6587288998 6.4110100019  
H 5.4783398786 -7.1312837512 7.2950087487  
C 3.8194742221 -7.0489819533 5.9218017237  
H 3.2382469103 -7.8257602055 6.4046660499  
C 3.3250699758 -6.416935974 4.7862549853  
H 2.3590268788 -6.6841682046 4.3638373858

AQ-BF<sub>3</sub>-NO radical anion

C -7.0479733083 0.4162185825 -1.0595347312

C -6.2231323601 1.3871272561 -1.6388365104  
C -4.8571270376 1.3836288224 -1.3831278253  
C -4.3117506757 0.396302826 -0.5587833664  
C -2.84313737 0.3639084261 -0.3011507582  
C -2.2849503874 -0.8691172054 0.3293526807  
C -0.9009829853 -1.0269974103 0.2981992306  
C -0.3707059652 -2.213796039 0.7744915895  
C -1.1864349002 -3.2506192949 1.2360239857  
C -2.5898358928 -3.1276073876 1.2782851996  
C -3.1149620593 -1.8786516462 0.8568410185  
C -4.5696755438 -1.5661025155 0.9887892973  
C -5.1375437591 -0.5641414095 0.0281689737  
C -6.5108060122 -0.5487742412 -0.2148435189  
C -0.3427172652 -4.4421478816 1.6663091592  
N 1.0262213676 -3.8953579403 1.450980796  
C 1.0936137037 -2.5652313706 0.8219328809  
O -5.2815673623 -2.0013532191 1.873112127  
O -2.1263108405 1.2882882256 -0.6533477097  
O 2.0700593312 -4.57793703 1.6738667834  
H -8.1132455771 0.4167423125 -1.2708645224  
H -6.6511301978 2.1420815734 -2.2916957614  
H -4.1925022221 2.1264444892 -1.8128037328  
H -0.2843677753 -0.2309421131 -0.1086312705  
C -3.486965054 -4.2789161244 1.5607027613  
H -7.1264756544 -1.3077378733 0.256459034  
C -0.5024802707 -5.6854823569 0.7842275843  
C -0.4631077735 -4.7871101581 3.1554137912  
C 1.7187024609 -2.6837311435 -0.5725894222  
C 1.9113397672 -1.6219582478 1.7073111665  
B -4.1437506541 -4.8201609188 0.1281770689  
H -4.3095768213 -4.0019667678 2.2181112335  
H -2.9448927263 -5.1089275222 2.0139372015  
H -0.4487095942 -5.4140918779 -0.2728201996  
H -1.471308184 -6.16044801 0.9407448135  
H 0.3036880962 -6.3845928522 1.027456313  
H -0.3607814689 -3.8834691066 3.7639181373  
H 0.3394722963 -5.4832455609 3.4165160206  
H -1.4259935977 -5.2502510586 3.3751335351  
H 1.1215869363 -3.3483703616 -1.2024611707  
H 2.731068145 -3.0884017513 -0.4827058799  
H 1.763690505 -1.6988156711 -1.0475892405  
H 1.4515039436 -1.5339527442 2.6955446381  
H 1.9593773575 -0.6277662805 1.2525839285  
H 2.925389902 -2.0164658705 1.8193728352  
F -3.1133565818 -5.2493385647 -0.7428029902  
F -4.8569294162 -3.7669491053 -0.5029785752  
F -5.0140965179 -5.8935858814 0.3919734009

AQ-BF<sub>3</sub>-NO neutral

C -7.0705673232 0.5130600985 -0.9988480409  
C -6.2345797553 1.4803781838 -1.5663507403  
C -4.8652378677 1.4423879108 -1.3333448248  
C -4.3293801465 0.4231635053 -0.5425749676  
C -2.8659897578 0.3635499719 -0.3072656482

C -2.3151972817 -0.8819912468 0.3288490402  
 C -0.9289184313 -1.0326876551 0.2952193146  
 C -0.407151634 -2.2140496435 0.7833736867  
 C -1.2228599008 -3.2396121732 1.2625334261  
 C -2.6241479806 -3.1285420591 1.295888892  
 C -3.1479474793 -1.8815833009 0.8534245132  
 C -4.6166211037 -1.5848675854 0.9479757441  
 C -5.1662783785 -0.5388833708 0.0313732821  
 C -6.542180454 -0.4869643583 -0.1896226029  
 C -0.4072866059 -4.4281752089 1.7342933839  
 N 0.9920675521 -3.9038650775 1.4870593371  
 C 1.0520831265 -2.5702279592 0.7922153569  
 O -5.3387917071 -2.0986628668 1.7773212065  
 O -2.1175844264 1.2570738315 -0.6627043226  
 O 1.9646129004 -4.4940190045 1.8040953295  
 H -8.1386634044 0.5438384799 -1.1893666158  
 H -6.6564178012 2.2614501245 -2.1906905385  
 H -4.1941759725 2.183642438 -1.7549078335  
 H -0.3197759317 -0.2363333664 -0.1214733262  
 C -3.4840184793 -4.3048846776 1.518647155  
 H -7.1714392691 -1.2406396451 0.2716182245  
 C -0.4918365348 -5.7225343679 0.9026392607  
 C -0.4876661008 -4.6994932207 3.245125846  
 C 1.6190786249 -2.8390526522 -0.6125030125  
 C 1.9510155193 -1.64635493 1.6147242018  
 B -3.8865531194 -4.8469108565 -0.0258729446  
 H -4.407003343 -4.0726016161 2.0416273171  
 H -2.9720064033 -5.1142301488 2.0407698176  
 H -0.3978282146 -5.5133585472 -0.1640137433  
 H -1.4825831106 -6.1551466215 1.0391421579  
 H 0.2758948648 -6.4227399141 1.2434375136  
 H -0.2895748049 -3.7881817123 3.8155132421  
 H 0.2160561524 -5.4846594447 3.5313314705  
 H -1.5028544356 -5.0268421152 3.470791975  
 H 0.9802220061 -3.5300709726 -1.1672784521  
 H 2.6396204271 -3.2258901033 -0.5501045391  
 H 1.6263980074 -1.8838138487 -1.1425561022  
 H 1.5608958964 -1.5212125084 2.6276783406  
 H 1.9502473086 -0.6691375409 1.1267177848  
 H 2.9749303248 -2.0256878793 1.6496123239  
 F -2.6842598401 -5.0449236412 -0.7626288524  
 F -4.64971643 -3.8534736837 -0.6626714932  
 F -4.5795992816 -6.05000902 0.0781494566

## Solvent Phase Structure Cartesian Coordinates and Free Energies

AQ-NO singlet anion

G = -1052.802338 H

C 0.6098448143 1.2475474061 0.1061418982  
 C 0.3080444666 -0.1054217491 0.3152183202  
 C 1.3104260152 -1.0646231621 0.2942455422  
 C 2.6327687223 -0.6660034777 0.061817631  
 C 2.9352071109 0.6919769928 -0.1521474694

C 1.9159048114 1.6521288862 -0.1302279888  
C 4.3324687475 1.1370772493 -0.4036595073  
C 5.4059201764 0.0964093998 -0.425008071  
C 5.1051978599 -1.2560839403 -0.2077403454  
C 3.7009846695 -1.7015395649 0.048481034  
C 6.7254048811 0.4853099949 -0.664111993  
C 7.7397533991 -0.4670651645 -0.6863170547  
C 7.4403472149 -1.8143357834 -0.468685625  
C 6.1269325574 -2.2073793145 -0.2302070886  
O 4.6048362979 2.3133844787 -0.5874221961  
O 3.4494327535 -2.8811615746 0.2404278998  
C -0.6455096581 2.0744526501 0.2219489213  
C -1.1687783622 -0.2659323344 0.5752475286  
H 8.2325901725 -2.5564281382 -0.4857720083  
H 5.8767742593 -3.2494386602 -0.0595261973  
N -1.6947249934 1.0279202763 0.0544973331  
O -2.9220241864 1.3830789552 0.595341511  
C -0.7948294995 3.0984280112 -0.9035704918  
C -0.6918086494 2.8127934394 1.57260953  
C -1.4385865578 -0.5086563204 2.0712853684  
C -1.7977707746 -1.4051000991 -0.2286145728  
H -0.7190098652 2.6078695458 -1.8790332638  
H -0.0349101861 3.886108968 -0.8400153342  
H -1.784039965 3.561556501 -0.8269361803  
H -0.4030320941 2.1706077061 2.4083822034  
H -1.7216609089 3.1439883942 1.7330719602  
H -0.0178658333 3.6770050892 1.5606192769  
H -0.9056463216 0.200012232 2.7097377661  
H -1.1302849976 -1.5214645571 2.3551821071  
H -2.5109924325 -0.3846007656 2.2435603546  
H -1.5634772404 -1.2969997392 -1.292064392  
H -2.8850036985 -1.3553919697 -0.107710591  
H -1.4512522743 -2.3866784405 0.1156716833  
H 1.0971839517 -2.1182819681 0.4535819511  
H 2.1699909626 2.69521462 -0.2984478396  
H 6.9401601785 1.5359720002 -0.8304473097  
H 8.7647154764 -0.1616180729 -0.8726343006

AQ-NO triplet anion

G = -1052.839037 H

C -6.1107577405 1.9926353538 -0.0359244503  
C -6.1057568344 0.5784904141 -0.014791921  
C -4.9081604896 -0.1050430092 0.0114734982  
C -3.6729639909 0.5840049515 0.0177936988  
C -3.6779901832 2.0052992042 -0.0034469776  
C -4.9180273593 2.6850994285 -0.0302218686  
C -2.4401970145 2.780418654 0.0016129758  
C -1.1950916845 2.0157003776 0.0297181383  
C -1.1900576192 0.5921559677 0.0509929058  
C -2.4297215708 -0.181845284 0.0458905536  
C 0.0350601033 2.7154846406 0.0357660137  
C 1.2208557798 2.01985638 0.0620106457  
C 1.2258554682 0.6060493161 0.0831394071  
C 0.0450108517 -0.0984194813 0.0778180206

O -2.4431886708 4.0374612019 -0.0171608547  
O -2.4238218648 -1.4388779786 0.064641305  
C 2.6240120341 2.5781572101 0.0723615089  
N 3.41291867 1.3211274377 0.1014985918  
C 2.6329233041 0.0582422318 0.1100226503  
O 4.6809348438 1.32585482 0.1177924539  
H -7.0543738764 2.5307165766 -0.0566115829  
H -7.0455424144 0.0333724429 -0.019291727  
H -4.8815513207 -1.19052959 0.0279958982  
H -4.8990959935 3.7707559888 -0.0461467528  
H 0.0060117768 3.8020608521 0.0191358017  
H 0.0236479802 -1.1851855862 0.0936695817  
C 2.9292832715 3.4033955071 1.3244096886  
C 2.9628812008 3.3660584073 -1.1949751748  
C 2.9438873166 -0.727031382 1.3861424128  
C 2.9774920228 -0.7647649554 -1.1332363702  
H 2.6924453914 2.8360276135 2.2293614672  
H 2.3294836956 4.3185962922 1.3191943242  
H 3.9888052878 3.6761528481 1.3416034785  
H 2.7502773977 2.77189303 -2.0886819269  
H 4.0225429827 3.6387808965 -1.1918572824  
H 2.3633400251 4.2806438442 -1.2330465736  
H 2.7029424575 -0.1345624296 2.2737585524  
H 4.0053099226 -0.9916528145 1.4113734866  
H 2.3505758401 -1.6461983716 1.4083399519  
H 2.7607821398 -0.199094706 -2.0442789781  
H 2.3844419226 -1.6842992859 -1.1438922263  
H 4.0390569409 -1.0297670146 -1.1220823442

AQ-NO open-shell singlet anion

G = -1052.837980 H

C -6.1107577405 1.9926353538 -0.0359244503  
C -6.1057568344 0.5784904141 -0.014791921  
C -4.9081604896 -0.1050430092 0.0114734982  
C -3.6729639909 0.5840049515 0.0177936988  
C -3.6779901832 2.0052992042 -0.0034469776  
C -4.9180273593 2.6850994285 -0.0302218686  
C -2.4401970145 2.780418654 0.0016129758  
C -1.1950916845 2.0157003776 0.0297181383  
C -1.1900576192 0.5921559677 0.0509929058  
C -2.4297215708 -0.181845284 0.0458905536  
C 0.0350601033 2.7154846406 0.0357660137  
C 1.2208557798 2.01985638 0.0620106457  
C 1.2258554682 0.6060493161 0.0831394071  
C 0.0450108517 -0.0984194813 0.0778180206  
O -2.4431886708 4.0374612019 -0.0171608547  
O -2.4238218648 -1.4388779786 0.064641305  
C 2.6240120341 2.5781572101 0.0723615089  
N 3.41291867 1.3211274377 0.1014985918  
C 2.6329233041 0.0582422318 0.1100226503  
O 4.6809348438 1.32585482 0.1177924539  
H -7.0543738764 2.5307165766 -0.0566115829  
H -7.0455424144 0.0333724429 -0.019291727  
H -4.8815513207 -1.19052959 0.0279958982



H -4.8990959935 3.7707559888 -0.0461467528  
H 0.0060117768 3.8020608521 0.0191358017  
H 0.0236479802 -1.1851855862 0.0936695817  
C 2.9292832715 3.4033955071 1.3244096886  
C 2.9628812008 3.3660584073 -1.1949751748  
C 2.9438873166 -0.727031382 1.3861424128  
C 2.9774920228 -0.7647649554 -1.1332363702  
H 2.6924453914 2.8360276135 2.2293614672  
H 2.3294836956 4.3185962922 1.3191943242  
H 3.9888052878 3.6761528481 1.3416034785  
H 2.7502773977 2.77189303 -2.0886819269  
H 4.0225429827 3.6387808965 -1.1918572824  
H 2.3633400251 4.2806438442 -1.2330465736  
H 2.7029424575 -0.1345624296 2.2737585524  
H 4.0053099226 -0.9916528145 1.4113734866  
H 2.3505758401 -1.6461983716 1.4083399519  
H 2.7607821398 -0.199094706 -2.0442789781  
H 2.3844419226 -1.6842992859 -1.1438922263  
H 4.0390569409 -1.0297670146 -1.1220823442

AQ-NO radical

G = -1052.723378 H  
C -6.130916885 1.9839633626 -0.036369304  
C -6.1259767569 0.5870009713 -0.0154892281  
C -4.919994146 -0.1066477876 0.0113391898  
C -3.7117442562 0.5928713247 0.0174102303  
C -3.7167066898 1.996150113 -0.0035650709  
C -4.9298720535 2.6866142559 -0.0304112368  
C -2.4418119856 2.7713602216 0.0023035891  
C -1.1601682738 2.0069056981 0.0307863183  
C -1.1551973462 0.6012246827 0.0517977045  
C -2.4314006496 -0.1727828868 0.0463144632  
C 0.0434211016 2.7166951351 0.0362246232  
C 1.2381636852 2.0122709164 0.0625645724  
C 1.2431092709 0.6137701921 0.0834683406  
C 0.0533802727 -0.0995568756 0.078319484  
O -2.4455919573 3.990945004 -0.0156212495  
O -2.4265549503 -1.3923549971 0.0648345439  
C 2.6367500354 2.5771038141 0.0726155875  
N 3.425935413 1.3211859413 0.1022921931  
C 2.6456534904 0.0593933792 0.1102501604  
O 4.6922937087 1.3259114038 0.1188358893  
H -7.0724538213 2.5236182971 -0.0572829029  
H -7.0636720413 0.040317955 -0.020165272  
H -4.8993502868 -1.1914600378 0.0278071696  
H -4.9169011331 3.7715529077 -0.0463750204  
H 0.0207436781 3.8027311904 0.01975258  
H 0.0383844246 -1.185733245 0.0943165958  
C 2.9306361587 3.4043735359 1.3255955907  
C 2.9641668262 3.365827497 -1.196819365  
C 2.9452489648 -0.7279564917 1.3873665881  
C 2.9787751863 -0.7645853968 -1.1350773745  
H 2.6945633169 2.8375065538 2.2308769129  
H 2.3310246136 4.3194556141 1.3159022615

H 3.9893768116 3.6779094743 1.3430191766  
H 2.7519348912 2.7715193544 -2.0903272615  
H 4.0231212025 3.6390853367 -1.1944799991  
H 2.3649202178 4.2805668342 -1.2309778689  
H 2.7050808745 -0.1359663799 2.2753248398  
H 4.0058948325 -0.9933591828 1.4128451702  
H 2.3521215678 -1.6471347352 1.4050939114  
H 2.7624473346 -0.1987629614 -2.0459276668  
H 2.3860114799 -1.6841488316 -1.1418199473  
H 4.0396338733 -1.0301611574 -1.1246789182

1,2,5,8-THAQ-NO singlet anion

G = -1353.6269 H

C -3.9193737818 2.7450037137 -0.0302420633  
C -3.9051664937 1.3695737405 0.0126539548  
C -2.6840687691 0.6516215042 0.0408281439  
C -1.4776772014 1.3621857519 0.0041989739  
C -1.4917668093 2.7951932771 -0.0371795815  
C -2.7147472264 3.4859673485 -0.0437869709  
C -0.2460548736 3.5371707889 -0.0623624403  
C 1.0261351567 2.8022586899 -0.0655211825  
C 1.0508719613 1.3895484178 -0.0285941886  
C -0.2151784669 0.6265865597 0.0191320945  
C 2.2333808313 3.5066079745 -0.1063031768  
C 3.4574975196 2.8052785397 -0.1133654975  
C 3.4676688633 1.4196569808 -0.0779223038  
C 2.26363933 0.7134474691 -0.0346479818  
O -0.2315952547 4.7953168953 -0.084161813  
O -0.1891629097 -0.615426067 0.0697925644  
C -5.3384540698 3.2586623462 0.0008708429  
C -5.3131438539 0.8310382636 0.0834245694  
O -2.7301262569 -0.6842154932 0.1076432429  
O -2.7962988354 4.8225452863 -0.0546019874  
O 2.3321656945 4.8481508398 -0.1413874225  
O 4.615781856 3.4961875893 -0.1544736618  
H 4.4215844227 0.9022373134 -0.0843647644  
H 1.4129405084 5.2069084574 -0.1291187475  
H 4.4181132336 4.4461476317 -0.1752712684  
H 2.2637216066 -0.3704988156 -0.0058164776  
H -1.7905876515 -0.9986296391 0.1119794455  
H -1.8785912701 5.1759797433 -0.0659341801  
N -6.0919920333 2.0232001486 -0.3601666615  
O -7.4015226344 2.0265338619 0.0972687244  
C -5.6442994467 4.316313287 -1.0637877618  
C -5.6776538838 3.8306695478 1.3881870929  
C -5.6338601582 0.3501127713 1.5100679146  
C -5.601668492 -0.3047525739 -0.9020569957  
H -5.2754210184 3.9926534072 -2.0426159925  
H -5.2067117985 5.2880836128 -0.819613691  
H -6.7333989642 4.4142101277 -1.1239967075  
H -5.3940508184 3.151163632 2.195904111  
H -6.7606297713 3.9734633679 1.4310255164  
H -5.1650116101 4.7859186421 1.5426414797  
H -5.3400328374 1.0797921493 2.2688624086

H -5.1173816876 -0.5924534057 1.7196663143  
H -6.7162245659 0.208825705 1.5746891762  
H -5.2472852323 -0.0422749899 -1.9041810954  
H -6.6885436883 -0.4320961257 -0.9450060684  
H -5.1386486191 -1.2462582731 -0.5948158867

1,2,5,8-THAQ-NO triplet anion

G = -1353.67933 H

C -3.9058481954 2.7635972747 0.0879188656  
C -3.8950410671 1.3612764979 0.1325061313  
C -2.7032690785 0.6499417208 0.1226091725  
C -1.4771116861 1.3671710978 0.0660132708  
C -1.4888218984 2.7980793045 0.0205480065  
C -2.7299059877 3.4944222923 0.0323276068  
C -0.2569396034 3.5317741949 -0.0367830765  
C 0.9829272799 2.7979516063 -0.0473608115  
C 1.0081473721 1.3767951906 -0.002572525  
C -0.2337894816 0.6270164625 0.0555283545  
C 2.2082508695 3.502466374 -0.1035707245  
C 3.4158564395 2.8124211133 -0.1146716092  
C 3.433110233 1.4116455789 -0.0703096912  
C 2.2441025334 0.7051640735 -0.0150292594  
O -0.2462231528 4.8307356055 -0.0786285456  
O -0.2287189771 -0.6468154321 0.0961541776  
C -5.3117743558 3.3111111428 0.1088241258  
C -5.2901601953 0.7913078115 0.1889690706  
O -2.7133181047 -0.6961207677 0.16600871  
O -2.7783501644 4.8453643684 -0.009528036  
O 2.2645319444 4.8528491821 -0.1483194561  
O 4.5868562984 3.503018445 -0.1689493691  
H 4.3922344307 0.9026907567 -0.080364422  
H 1.3033287166 5.1513567407 -0.1314264854  
H 4.3745272669 4.4490714802 -0.1934161429  
H 2.2448430143 -0.3788502723 0.0196479706  
H -1.7319147466 -0.9548016208 0.1473420385  
H -1.8280395725 5.1465320393 -0.0453231673  
N -6.0850644242 2.0449892345 0.1704833108  
O -7.3523519574 2.035938924 0.2052334443  
C -5.6792621383 4.0721573081 -1.1674564721  
C -5.6105557017 4.1528724876 1.3518880144  
C -5.5745098101 0.0241295811 1.4829006505  
C -5.643473255 -0.0567776727 -1.0356094079  
H -5.4718421282 3.4635014276 -2.0528450519  
H -5.0936544106 4.9930731418 -1.2267825182  
H -6.7440555875 4.3236370605 -1.1514281584  
H -5.3539651955 3.6018739853 2.2618113611  
H -6.6751353664 4.4044383714 1.3778807882  
H -5.0244040965 5.0748060112 1.3200978891  
H -5.3314926982 0.6368409346 2.3563180938  
H -4.9684401502 -0.8850566534 1.5099775355  
H -6.6335578619 -0.2481193478 1.5242235256  
H -5.449436499 0.4981527226 -1.9585008423  
H -6.7027700296 -0.3290326125 -1.0015303736  
H -5.0383488209 -0.9669871653 -1.0372659686

1,2,5,8-THAQ-NO open-shell singlet anion

G = -1353.678270 H

C -3.9058481954 2.7635972747 0.0879188656  
C -3.8950410671 1.3612764979 0.1325061313  
C -2.7032690785 0.6499417208 0.1226091725  
C -1.4771116861 1.3671710978 0.0660132708  
C -1.4888218984 2.7980793045 0.0205480065  
C -2.7299059877 3.4944222923 0.0323276068  
C -0.2569396034 3.5317741949 -0.0367830765  
C 0.9829272799 2.7979516063 -0.0473608115  
C 1.0081473721 1.3767951906 -0.002572525  
C -0.2337894816 0.6270164625 0.0555283545  
C 2.2082508695 3.502466374 -0.1035707245  
C 3.4158564395 2.8124211133 -0.1146716092  
C 3.433110233 1.4116455789 -0.0703096912  
C 2.2441025334 0.7051640735 -0.0150292594  
O -0.2462231528 4.8307356055 -0.0786285456  
O -0.2287189771 -0.6468154321 0.0961541776  
C -5.3117743558 3.3111111428 0.1088241258  
C -5.2901601953 0.7913078115 0.1889690706  
O -2.7133181047 -0.6961207677 0.16600871  
O -2.7783501644 4.8453643684 -0.009528036  
O 2.2645319444 4.8528491821 -0.1483194561  
O 4.5868562984 3.503018445 -0.1689493691  
H 4.3922344307 0.9026907567 -0.080364422  
H 1.3033287166 5.1513567407 -0.1314264854  
H 4.3745272669 4.4490714802 -0.1934161429  
H 2.2448430143 -0.3788502723 0.0196479706  
H -1.7319147466 -0.9548016208 0.1473420385  
H -1.8280395725 5.1465320393 -0.0453231673  
N -6.0850644242 2.0449892345 0.1704833108  
O -7.3523519574 2.035938924 0.2052334443  
C -5.6792621383 4.0721573081 -1.1674564721  
C -5.6105557017 4.1528724876 1.3518880144  
C -5.5745098101 0.0241295811 1.4829006505  
C -5.643473255 -0.0567776727 -1.0356094079  
H -5.4718421282 3.4635014276 -2.0528450519  
H -5.0936544106 4.9930731418 -1.2267825182  
H -6.7440555875 4.3236370605 -1.1514281584  
H -5.3539651955 3.6018739853 2.2618113611  
H -6.6751353664 4.4044383714 1.3778807882  
H -5.0244040965 5.0748060112 1.3200978891  
H -5.3314926982 0.6368409346 2.3563180938  
H -4.9684401502 -0.8850566534 1.5099775355  
H -6.6335578619 -0.2481193478 1.5242235256  
H -5.449436499 0.4981527226 -1.9585008423  
H -6.7027700296 -0.3290326125 -1.0015303736  
H -5.0383488209 -0.9669871653 -1.0372659686

1,2,5,8-THAQ-NO radical

G = -1353.547363 H

C -3.923652785 2.7499316139 0.0887912468  
C -3.9091362856 1.3750207317 0.1324579249

C -2.6944890126 0.6539155381 0.1222445918  
C -1.4935715665 1.3685374397 0.0663992618  
C -1.5076039495 2.7962040785 0.0210196134  
C -2.7243081167 3.4919640785 0.032110455  
C -0.2530089066 3.5403115371 -0.0372722784  
C 1.015248518 2.8046341483 -0.0485196033  
C 1.038587369 1.3903624457 -0.0037900299  
C -0.22416 0.6292199425 0.0552790629  
C 2.2229972706 3.506381561 -0.1041986632  
C 3.4473686931 2.8013972109 -0.1151784846  
C 3.4545945797 1.4163797634 -0.0709291097  
C 2.2495017346 0.7124101859 -0.0152748475  
O -0.2502874571 4.793024336 -0.0774888818  
O -0.2102632281 -0.6101227092 0.0946354956  
C -5.3255361848 3.3078455406 0.1093436793  
C -5.2978573405 0.7898967395 0.1892795956  
O -2.7519345042 -0.6822721955 0.1666340798  
O -2.8188252226 4.8273070071 -0.0080572294  
O 2.3298718797 4.8452518283 -0.1501518445  
O 4.6050767383 3.4872079452 -0.1689721345  
H 4.4070873016 0.8966494523 -0.0803922508  
H 1.4211419131 5.220866346 -0.137316354  
H 4.4155296712 4.4388836303 -0.1942865089  
H 2.2493874562 -0.3713941459 0.0195010458  
H -1.8156301891 -1.0063751331 0.1513045866  
H -1.9056289364 5.1905103487 -0.0447118828  
N -6.095603908 2.0407422696 0.1711455927  
O -7.3607536913 2.0280093533 0.2060339018  
C -5.6884697355 4.0671969111 -1.1692199568  
C -5.6192657612 4.1482014416 1.3545750059  
C -5.571731584 0.0233885955 1.4857616272  
C -5.6409716397 -0.0574270818 -1.0386061982  
H -5.4677536028 3.464600278 -2.0552339837  
H -5.1240073458 5.001041829 -1.2227528608  
H -6.7575734907 4.2972361833 -1.155447495  
H -5.3493393221 3.6031978353 2.2639564799  
H -6.687921445 4.3787760383 1.3846390241  
H -5.0543449935 5.0825534065 1.3172177051  
H -5.3160563861 0.631675023 2.3584213163  
H -4.9834492124 -0.8969257743 1.5071807151  
H -6.6343852266 -0.2311806863 1.531177871  
H -5.4344066883 0.4933067044 -1.9610690821  
H -6.70409166 -0.3124266121 -1.009462152  
H -5.0532037471 -0.9783049801 -1.0332380466

1,4,5-TAAQ-NO singlet anion

G = -1218.792343 H

C -5.3002078319 2.7445603644 -0.0399255825  
C -5.2748728799 1.3612305393 -0.072359345  
C -4.0479964504 0.6572036468 -0.0939385654  
C -2.8369252373 1.4152924992 -0.0491137479  
C -2.9080808394 2.8302937511 0.0026085515  
C -4.1244018096 3.497533217 0.0030134327  
C -1.6735076428 3.6617984847 0.055284845

C -0.366470323 2.9988393386 0.0597915719  
C -0.2926074641 1.5638138213 -0.0080049254  
C -1.5266338973 0.7544255725 -0.0768805208  
C 0.8044393285 3.7754802578 0.1466794106  
C 0.9593707623 0.9230544687 0.0110650219  
C 2.0540580904 3.0950125469 0.1834434322  
C 2.1247567216 1.7357310739 0.1177747667  
O -1.7809282906 4.8937333881 0.1006712151  
O -1.4462652665 -0.4880974063 -0.153583559  
C -6.7225977506 3.242617915 -0.0914593724  
C -6.6900074347 0.8187748793 -0.1352884497  
N -4.0639346648 -0.7060445599 -0.1308215954  
H -4.1380999449 4.581908154 0.0373113357  
N 0.8286134165 5.1403754065 0.1671881637  
H 2.964164594 3.6848296323 0.2580841869  
H 3.0939673158 1.2434688031 0.139594698  
H -0.04506112 5.63398199 0.2825675871  
H 1.691295635 5.5965346208 0.4243216453  
N 1.1588044265 -0.4286037431 -0.103255502  
H -4.9300383297 -1.1704492521 -0.3523381469  
H -3.1916814675 -1.190520233 -0.2831864372  
H 0.3544560387 -1.0310896142 -0.0053145757  
H 2.0621622995 -0.785784847 0.1722646764  
N -7.470753122 2.0205719325 0.2946707052  
O -8.7872357884 2.0087358911 -0.1437559906  
C -7.0559355703 3.7824265668 -1.4940874139  
C -7.0101563142 4.3373626719 0.9380559591  
C -7.0211625742 -0.2798044026 0.8854269111  
C -7.0446186402 0.318834024 -1.5486710463  
H -6.7754803326 3.0799963914 -2.283001542  
H -6.5291338681 4.7265650802 -1.6746220836  
H -8.1356855199 3.944064857 -1.5502057764  
H -6.7121654767 4.0070298395 1.9382713398  
H -8.087165463 4.5361269625 0.9460084108  
H -6.4847402429 5.2696429735 0.6995640867  
H -6.5740932852 -0.0538767198 1.8585552589  
H -6.7085905426 -1.2838030896 0.5765879012  
H -8.1107672593 -0.2842362104 0.9966452023  
H -6.6871349048 0.995487923 -2.3289690594  
H -8.136028753 0.2678375919 -1.6086546673  
H -6.6185523265 -0.6726869985 -1.7427824112

#### 1,4,5-TAAQ-NO triplet anion

G = -1218.820115 H

C -5.285844656 2.7599451957 -0.1417364474  
C -5.266219901 1.3560915972 -0.1702866884  
C -4.0566752433 0.656732372 -0.1311304136  
C -2.8242107245 1.4071438858 -0.0774372033  
C -2.8883109654 2.8274009767 -0.0365843313  
C -4.1287146665 3.4987959471 -0.0674568748  
C -1.6861113519 3.6532207069 0.0457372442  
C -0.3937070575 2.9904596952 0.031693722  
C -0.3167505717 1.5512777076 -0.0404992914  
C -1.528711052 0.7392158306 -0.0841013956

C 0.8059018421 3.7635490499 0.1188384674  
C 0.9683229663 0.920529884 -0.0298630987  
C 2.0304080337 3.1022346021 0.1713361875  
C 2.1079830303 1.7138407675 0.0968615912  
O -1.8154465436 4.9119864274 0.1349865872  
O -1.4576775095 -0.5349775181 -0.1229923717  
C -6.694284167 3.3000169997 -0.189412951  
C -6.6706119428 0.7834595114 -0.2167480362  
N -4.0505370842 -0.7203818083 -0.0940885237  
H -4.1326660983 4.5829415928 -0.032572182  
N 0.7993791046 5.156410302 0.0997411658  
H 2.9415958398 3.6912752409 0.2483974781  
H 3.0805428789 1.227077682 0.1161318065  
H -0.1108043566 5.5600198131 0.3010770348  
H 1.5907365984 5.5873430348 0.5590278998  
N 1.146843815 -0.4525152176 -0.1930258943  
H -4.8453208611 -1.2021023413 -0.4849721636  
H -3.1314498839 -1.1323355169 -0.2366261055  
H 0.307833491 -0.9963770806 -0.0240712005  
H 1.9983058351 -0.8128773701 0.2172589906  
N -7.466670513 2.0385463794 -0.1586128746  
O -8.7337794462 2.0270096553 -0.2035718389  
C -6.9931147172 4.0546153592 -1.4883490518  
C -7.0539722901 4.1511478857 1.0288150055  
C -7.0421200623 -0.0739774968 0.9981055588  
C -7.0214019593 0.0625963478 -1.5256656936  
H -6.7336255101 3.4448809378 -2.359060474  
H -6.4067914449 4.9777180997 -1.5229545836  
H -8.0565912298 4.3083900901 -1.5347707198  
H -6.8471309937 3.606519147 1.954875641  
H -8.1156578023 4.4143465815 0.99878581  
H -6.4629385163 5.0718109295 1.0253265633  
H -6.7980674539 0.4527707454 1.9254032899  
H -6.5040447108 -1.0249055987 0.9890548426  
H -8.1167400195 -0.2799832869 0.9794289727  
H -6.7336991923 0.6690401361 -2.3893428525  
H -8.1009736207 -0.1132421437 -1.5589363936  
H -6.5201093161 -0.9065057378 -1.6007842036

1,4,5-THAQ-NO open-shell singlet anion

G = -1218.819063 H

C -5.285844656 2.7599451957 -0.1417364474  
C -5.266219901 1.3560915972 -0.1702866884  
C -4.0566752433 0.656732372 -0.1311304136  
C -2.8242107245 1.4071438858 -0.0774372033  
C -2.8883109654 2.8274009767 -0.0365843313  
C -4.1287146665 3.4987959471 -0.0674568748  
C -1.6861113519 3.6532207069 0.0457372442  
C -0.3937070575 2.9904596952 0.031693722  
C -0.3167505717 1.5512777076 -0.0404992914  
C -1.528711052 0.7392158306 -0.0841013956  
C 0.8059018421 3.7635490499 0.1188384674  
C 0.9683229663 0.920529884 -0.0298630987  
C 2.0304080337 3.1022346021 0.1713361875

C 2.1079830303 1.7138407675 0.0968615912  
O -1.8154465436 4.9119864274 0.1349865872  
O -1.4576775095 -0.5349775181 -0.1229923717  
C -6.694284167 3.3000169997 -0.189412951  
C -6.6706119428 0.7834595114 -0.2167480362  
N -4.0505370842 -0.7203818083 -0.0940885237  
H -4.1326660983 4.5829415928 -0.032572182  
N 0.7993791046 5.156410302 0.0997411658  
H 2.9415958398 3.6912752409 0.2483974781  
H 3.0805428789 1.227077682 0.1161318065  
H -0.1108043566 5.5600198131 0.3010770348  
H 1.5907365984 5.5873430348 0.5590278998  
N 1.146843815 -0.4525152176 -0.1930258943  
H -4.8453208611 -1.2021023413 -0.4849721636  
H -3.1314498839 -1.1323355169 -0.2366261055  
H 0.307833491 -0.9963770806 -0.0240712005  
H 1.9983058351 -0.8128773701 0.2172589906  
N -7.466670513 2.0385463794 -0.1586128746  
O -8.7337794462 2.0270096553 -0.2035718389  
C -6.9931147172 4.0546153592 -1.4883490518  
C -7.0539722901 4.1511478857 1.0288150055  
C -7.0421200623 -0.0739774968 0.9981055588  
C -7.0214019593 0.0625963478 -1.5256656936  
H -6.7336255101 3.4448809378 -2.359060474  
H -6.4067914449 4.9777180997 -1.5229545836  
H -8.0565912298 4.3083900901 -1.5347707198  
H -6.8471309937 3.606519147 1.954875641  
H -8.1156578023 4.4143465815 0.99878581  
H -6.4629385163 5.0718109295 1.0253265633  
H -6.7980674539 0.4527707454 1.9254032899  
H -6.5040447108 -1.0249055987 0.9890548426  
H -8.1167400195 -0.2799832869 0.9794289727  
H -6.7336991923 0.6690401361 -2.3893428525  
H -8.1009736207 -0.1132421437 -1.5589363936  
H -6.5201093161 -0.9065057378 -1.6007842036

#### 1,4,5-TAAQ-NO radical

G = -1218.716835 H  
C -5.2998378855 2.7404221131 -0.1575389447  
C -5.2803581076 1.3556403032 -0.1949129183  
C -4.0560269226 0.6459905774 -0.1563205025  
C -2.8475308434 1.4083759005 -0.084590252  
C -2.9177350649 2.8193881476 -0.0458676242  
C -4.1306631951 3.4923479144 -0.0808922307  
C -1.6826787169 3.6563000536 0.0380034918  
C -0.3842506897 2.9966002226 0.0648415723  
C -0.3071396967 1.5579907955 0.0029735767  
C -1.5294492632 0.7466001076 -0.0673692706  
C 0.7851920007 3.7763225018 0.1493151823  
C 0.9474038372 0.9213644797 0.0216423206  
C 2.0413902369 3.0975146912 0.1713291813  
C 2.1152279529 1.7416254648 0.1084022787  
O -1.804316857 4.887734757 0.0829071662  
O -1.4520549203 -0.4980260017 -0.1145501184



C -6.7020152437 3.2922658711 -0.1977635857  
C -6.6830996606 0.7783681279 -0.2578555388  
N -4.0592982146 -0.7144474191 -0.1555086045  
H -4.1453766627 4.5761249014 -0.0477183676  
N 0.8023642339 5.1311349038 0.2161609368  
H 2.949898308 3.6905146527 0.2380756285  
H 3.0857839006 1.2520852558 0.1218001747  
H -0.0663574579 5.6444875048 0.1863587304  
H 1.6860908871 5.6155410929 0.2559454926  
N 1.1488008948 -0.4231736749 -0.0630572804  
H -4.9004145331 -1.2169570551 -0.3856519708  
H -3.1704031271 -1.1883082247 -0.2383139305  
H 0.3537911334 -1.0420890408 -0.0112058414  
H 2.0760584733 -0.783251916 0.1060382699  
N -7.474841553 2.0362124939 -0.2887377924  
O -8.7409652437 2.0261534763 -0.3180449162  
C -6.9652021041 4.1533499713 -1.4344963056  
C -7.0751248052 4.0419923277 1.0833868807  
C -7.0827957581 -0.0128920827 0.9933704918  
C -6.9987692888 -0.0062389973 -1.5371303703  
H -6.6937525381 3.6148376668 -2.3472607738  
H -6.3765408393 5.0738731823 -1.3803331739  
H -8.0259087244 4.4168353696 -1.4786034657  
H -6.8852008513 3.4231505578 1.9652818415  
H -8.1356748466 4.3080682288 1.0566750121  
H -6.4838754514 4.9589706467 1.1633356672  
H -6.8749253231 0.5670180952 1.897171416  
H -6.5403720416 -0.9597761875 1.0561016031  
H -8.154012196 -0.2298575303 0.9499492343  
H -6.6391118122 0.5297214731 -2.4201295674  
H -8.0837096454 -0.1244524309 -1.6120244481  
H -6.555841774 -1.0052732688 -1.5279583548
